# Supplementary material
Source: publisher figshare collection journal article supplement (https://sage.figshare.com/ndownloader/files/23166626)
Supplement: Supplementary file 1 [file 23166626]

## Sheet: FAERS-PT
HERB	PREF_TERM	COUNT	PRR	PRR_LCI	PRR_UCI	ROR	ROR_LCI	ROR_UCI
Senna alexandrina	Urinary tract infection	410	3.37	3.06	3.72	3.38	3.06	3.73
Vaccinium macrocarpon	Urinary tract infection	313	10.43	9.29	11.7	10.48	9.33	11.77
Camellia siangensis	HAEMATOCHEZIA	4	37.88	13.62	105.31	37.89	13.63	105.36
Camellia sinensis	HAEMATOCHEZIA	7	3	1.43	6.31	3	1.43	6.31
Papaver somniferum	ABDOMINAL PAIN	5	6.67	2.67	16.65	6.67	2.67	16.65
Chenopodium album	ABDOMINAL PAIN	3	7.23	2.21	23.65	7.23	2.21	23.65
Plantago notata	HAEMORRHOIDS	6	15.06	6.72	33.77	15.07	6.72	33.81
Plantago ovata	HAEMORRHOIDS	6	14.97	6.68	33.56	14.98	6.68	33.6
Passiflora incarnata	ASTHENIA	7	15.57	6.62	36.63	15.57	6.62	36.63
Medicago sativa	ASTHENIA	15	5.35	3.14	9.13	5.35	3.14	9.13
Hypericum perforatum	FATIGUE	97	3.93	3.18	4.86	3.93	3.18	4.86
Silybum marianum	FATIGUE	270	4.71	4.14	5.36	4.71	4.14	5.36
Oenothera biennis	FATIGUE	4	3.44	1.21	9.75	3.44	1.21	9.75
Viscum album	FATIGUE	5	7.42	2.75	19.99	7.42	2.75	19.99
Achillea millefolium	MALAISE	5	3.48	1.4	8.68	3.48	1.4	8.68
Rubia tinctorum	MALAISE	3	3.9	1.19	12.76	3.9	1.19	12.76
Harpagophytum procumbens	PAIN	14	5.98	3.38	10.57	5.98	3.38	10.57
Aloe vera	BURNING SENSATION	10	4.9	2.62	9.16	4.91	2.62	9.18
Medicago sativa	DECREASED APPETITE	5	3.21	1.32	7.83	3.21	1.32	7.83
Zingiber officinale	DECREASED APPETITE	35	3.92	2.79	5.5	3.92	2.79	5.5
Glycyrrhiza glabra	DECREASED APPETITE	62	3.9	3.02	5.03	3.9	3.02	5.03
Ginkgo biloba	FALL	123	3.31	2.76	3.97	3.31	2.76	3.97
Pygeum africanum	FALL	7	8.52	3.84	18.92	8.52	3.84	18.92
Vaccinium macrocarpon	FALL	246	3.63	3.19	4.13	3.64	3.2	4.14
Papaver somniferum	FALL	4	3.76	1.36	10.36	3.76	1.36	10.36
Ginkgo biloba	BLOOD PRESSURE INCREASED	61	3.63	2.81	4.68	3.64	2.82	4.7
Arnica montana	BLOOD PRESSURE INCREASED	3	6.79	2.12	21.72	6.79	2.12	21.72
Aesculus hippocastanum	BLOOD PRESSURE INCREASED	7	7.64	3.56	16.39	7.64	3.56	16.4
Glycyrrhiza glabra	BLOOD CREATINE PHOSPHOKINASE INCREASED	20	5.78	3.72	8.98	5.78	3.72	8.99
Ginkgo biloba	EATING DISORDER	7	3.05	1.45	6.4	3.05	1.45	6.41
Passiflora incarnata	ARTHRALGIA	3	6.01	1.81	19.91	6.01	1.81	19.91
Echinacea purpurea	ARTHRALGIA	8	7.86	3.73	16.56	7.86	3.73	16.56
Centella asiatica	MYALGIA	3	6.21	1.93	19.94	6.21	1.93	19.94
Vaccinium macrocarpon	MUSCLE SPASTICITY	29	8.87	6.16	12.77	8.91	6.18	12.85
Ginkgo biloba	MUSCULAR WEAKNESS	45	3.16	2.35	4.25	3.16	2.35	4.25
Vaccinium macrocarpon	MUSCULAR WEAKNESS	89	3.42	2.77	4.22	3.42	2.77	4.22
Crataegus laevigata	PAIN IN EXTREMITY	4	3.25	1.19	8.91	3.25	1.19	8.91
Ginkgo biloba	CLUMSINESS	4	11.38	4.27	30.3	11.42	4.28	30.51
Hypericum perforatum	TREMOR	43	5.79	4.26	7.88	5.8	4.26	7.89
Cannabis sativa	AGITATION	70	3.95	3.12	5	3.96	3.12	5.02
Papaver somniferum	AGITATION	3	10.21	3.2	32.58	10.21	3.2	32.59
Hypericum perfoliatum	AGITATION	4	6.32	2.34	17.1	6.32	2.34	17.1
Hypericum perforatum	AGITATION	47	13.09	9.75	17.58	13.11	9.76	17.62
Viscum album	AGITATION	3	29.62	8.8	99.68	29.62	8.8	99.68
Hypericum perforatum	HYPERAESTHESIA	4	9.73	3.64	25.98	9.74	3.64	26.03
Camellia siangensis	HYPOAESTHESIA	3	7.18	2.23	23.09	7.18	2.23	23.09
Camellia sinensis	HYPOAESTHESIA	34	3.88	2.76	5.46	3.88	2.76	5.46
Hypericum perfoliatum	PARAESTHESIA	7	5.91	2.76	12.66	5.91	2.76	12.66
Hypericum perforatum	PARAESTHESIA	55	8.08	6.14	10.63	8.09	6.15	10.65
Camellia siangensis	PARAESTHESIA	3	6.72	2.09	21.61	6.72	2.09	21.61
Camellia sinensis	PARAESTHESIA	37	3.96	2.85	5.5	3.96	2.85	5.5
Valeriana officinalis	DEPRESSION	5	3.51	1.43	8.64	3.51	1.43	8.64
Hypericum perfoliatum	DEPRESSION	9	4.74	2.41	9.33	4.74	2.41	9.33
Hypericum perforatum	DEPRESSION	85	8.01	6.39	10.04	8.02	6.4	10.05
Cannabis sativa	DEPRESSION	167	3.11	2.66	3.63	3.11	2.66	3.63
Valeriana officinalis	SLEEP DISORDER	4	14.11	5.18	38.4	14.11	5.18	38.41
Hypericum perforatum	SLEEP DISORDER	22	9.62	6.3	14.7	9.63	6.3	14.72
Ginkgo biloba	ARRHYTHMIA	28	4.42	3.04	6.42	4.43	3.05	6.43
Panax ginseng	ARRHYTHMIA	8	3.63	1.81	7.29	3.63	1.81	7.29
Harpagophytum procumbens	HEADACHE	9	3.15	1.58	6.27	3.15	1.58	6.27
Hedera helix	HEADACHE	7	9.56	4.06	22.49	9.56	4.06	22.49
Plantago major	LOSS OF CONSCIOUSNESS	3	19.41	5.74	65.59	19.41	5.74	65.59
Hypericum perfoliatum	LOSS OF CONSCIOUSNESS	5	4.96	2.03	12.13	4.96	2.03	12.13
Hypericum perforatum	LOSS OF CONSCIOUSNESS	18	3	1.88	4.79	3	1.88	4.79
Cannabis sativa	LOSS OF CONSCIOUSNESS	101	3.58	2.94	4.36	3.59	2.95	4.38
Achillea millefolium	LOSS OF CONSCIOUSNESS	5	10.6	4.25	26.43	10.6	4.25	26.43
Chenopodium album	DIZZINESS	3	3.3	1.01	10.79	3.3	1.01	10.79
Convallaria majalis	DIZZINESS	5	3.1	1.24	7.74	3.1	1.24	7.74
Hypericum perforatum	DIZZINESS	77	3.87	3.06	4.9	3.87	3.06	4.9
Plantago afra	DIZZINESS	7	8.23	3.61	18.79	8.23	3.61	18.79
Plantago caffra	DIZZINESS	7	9.55	4.13	22.08	9.55	4.13	22.08
Valeriana officinalis	DIZZINESS	8	3.14	1.52	6.48	3.14	1.52	6.48
Crataegus laevigata	DIARRHOEA	10	5.27	2.7	10.27	5.27	2.7	10.27
Papaver somniferum	DIARRHOEA	7	4.3	1.96	9.45	4.3	1.96	9.45
Plantago afra	DIARRHOEA	5	5.36	2.08	13.78	5.36	2.08	13.78
Plantago caffra	DIARRHOEA	5	6.15	2.37	15.97	6.15	2.37	15.97
Prunus americana	DIARRHOEA	4	14.76	4.55	47.93	14.76	4.55	47.93
Prunus africana	DIARRHOEA	4	14.76	4.55	47.93	14.76	4.55	47.93
Passiflora incarnata	DIARRHOEA	4	5.53	1.92	15.94	5.53	1.92	15.94
Geranium thunbergii	DIARRHOEA	4	132.83	14.85	1188.46	132.84	14.85	1188.56
Atropa belladonna	DIARRHOEA	47	3.28	2.43	4.43	3.28	2.43	4.43
Ruscus aculeatus	DIARRHOEA	6	9.06	3.67	22.34	9.06	3.67	22.34
Convallaria majalis	DIARRHOEA	9	5.86	2.88	11.9	5.86	2.88	11.9
Camellia siangensis	VOMITING	5	4.2	1.67	10.59	4.2	1.67	10.59
Ruscus aculeatus	VOMITING	7	12.33	5.24	29	12.33	5.24	29
Salsola kali	VOMITING	4	16.44	5.06	53.38	16.44	5.06	53.39
Sorghum halepense	VOMITING	3	3.47	1.06	11.33	3.47	1.06	11.33
Trifolium pratense	VOMITING	6	5.69	2.41	13.44	5.69	2.41	13.44
Valeriana officinalis	FEELING ABNORMAL	5	3.85	1.56	9.47	3.85	1.56	9.47
Aloe vera	FEELING ABNORMAL	24	3.53	2.34	5.32	3.53	2.34	5.32
Achillea millefolium	DEPRESSED LEVEL OF CONSCIOUSNESS	4	29.22	10.62	80.43	29.23	10.62	80.48
Senna alexandrina	DEPRESSED LEVEL OF CONSCIOUSNESS	118	3.45	2.88	4.13	3.47	2.89	4.16
Glycyrrhiza glabra	DEPRESSED LEVEL OF CONSCIOUSNESS	20	5.82	3.74	9.05	5.82	3.74	9.05
Piper methysticum	DEPRESSED LEVEL OF CONSCIOUSNESS	3	26.39	8.23	84.66	26.4	8.23	84.71
Allium salinum	COUGH	6	3.04	1.34	6.87	3.04	1.34	6.87
Arnica montana	COUGH	4	5.81	2.1	16.05	5.81	2.1	16.05
Kochia scoparia	COUGH	4	308.17	34.44	2757.25	308.19	34.44	2757.48
Salsola kali	COUGH	4	34.24	10.54	111.18	34.24	10.54	111.19
Paspalum notatum	COUGH	6	18.49	7.59	45.07	18.49	7.59	45.07
Paspalum nudatum	COUGH	4	20.54	6.82	61.89	20.55	6.82	61.92
Sorghum halepense	COUGH	11	35.31	17.3	72.08	35.32	17.3	72.11
Amaranthus retroflexus	COUGH	9	77.04	30.58	194.08	77.05	30.58	194.11
Plantago lanceolata	COUGH	10	32.1	15.35	67.12	32.1	15.35	67.13
Platanus occidentalis	COUGH	6	51.36	18.28	144.29	51.37	18.28	144.33
Ambrosia artemisiifolia	COUGH	11	17.3	9	33.27	17.3	9	33.27
Solanum lycopersicum	COUGH	4	22.01	7.24	66.87	22.01	7.24	66.87
Juniperus virginiana	COUGH	5	21.4	7.95	57.64	21.4	7.94	57.64
Iris germanica	COUGH	4	38.52	11.6	127.92	38.52	11.6	127.93
Fagus grandifolia	COUGH	4	77.04	19.27	308.04	77.05	19.27	308.09
Populus deltoides	COUGH	4	22.01	7.24	66.87	22.01	7.24	66.87
Juglans nigra	COUGH	4	28.02	8.92	88	28.02	8.92	88
Juglans regia	COUGH	4	308.17	34.44	2757.25	308.19	34.44	2757.48
Carya illinoiensis	COUGH	5	21.4	7.95	57.64	21.4	7.94	57.64
Theobroma cacao	COUGH	4	3.8	1.39	10.37	3.8	1.39	10.37
Carya illinoinensis	COUGH	5	21.4	7.95	57.64	21.4	7.94	57.64
Pygeum africanum	DYSPNOEA	5	3.44	1.37	8.66	3.44	1.37	8.66
Carthamus tinctorius	DYSPNOEA	3	3.52	1.07	11.6	3.52	1.07	11.6
Fraxinus americana	DYSPNOEA	3	7.91	2.23	28.03	7.91	2.23	28.03
Chenopodium album	DYSPNOEA	4	4.22	1.49	11.98	4.22	1.49	11.98
Melaleuca alternifolia	DYSPNOEA	8	5.27	2.49	11.14	5.27	2.49	11.14
Allium salinum	OEDEMA PERIPHERAL	6	3.92	1.73	8.86	3.92	1.73	8.86
Allium sativum	OEDEMA PERIPHERAL	90	3.07	2.49	3.79	3.08	2.5	3.8
Eucalyptus globulus	LOWER RESPIRATORY TRACT INFECTION	5	205.74	74.79	566	205.83	74.79	566.43
Senna alexandrina	LOWER RESPIRATORY TRACT INFECTION	150	6.29	5.36	7.38	6.36	5.41	7.48
Eucalyptus globulus	CHRONIC OBSTRUCTIVE PULMONARY DISEASE	5	106.23	38.61	292.27	106.25	38.61	292.37
Melaleuca alternifolia	CHEST PAIN	9	15.13	7.42	30.87	15.13	7.41	30.87
Arnica montana	CHEST PAIN	4	5.96	2.16	16.47	5.96	2.16	16.47
Pygeum africanum	CONDITION AGGRAVATED	3	5.88	1.83	18.88	5.89	1.83	18.91
Valeriana officinalis	CONDITION AGGRAVATED	6	6.35	2.78	14.51	6.35	2.78	14.52
Glycine max	CONDITION AGGRAVATED	21	3.51	2.27	5.43	3.51	2.27	5.43
Plantago notata	CONDITION AGGRAVATED	11	3.32	1.82	6.06	3.32	1.82	6.06
Plantago ovata	CONDITION AGGRAVATED	11	3.3	1.81	6.02	3.3	1.81	6.02
Viscum album	CONDITION AGGRAVATED	3	14.12	4.2	47.52	14.12	4.2	47.52
Vitis vinifera	BLOOD ALKALINE PHOSPHATASE INCREASED	6	3.21	1.44	7.16	3.21	1.44	7.16
Vitis vinifera	HAEMATOCRIT DECREASED	5	3.58	1.49	8.62	3.58	1.49	8.62
Pygeum africanum	HAEMATOCRIT DECREASED	3	41.82	13.03	134.24	41.83	13.03	134.32
Echinacea angustifolia	ASPARTATE AMINOTRANSFERASE INCREASED	3	33.42	10.03	111.3	33.43	10.04	111.35
Glycyrrhiza glabra	ASPARTATE AMINOTRANSFERASE INCREASED	41	7.19	5.27	9.8	7.2	5.28	9.82
Silybum marianum	ASPARTATE AMINOTRANSFERASE INCREASED	23	3.31	2.19	4.99	3.32	2.2	5.01
Ginkgo biloba	BLOOD ALBUMIN DECREASED	5	4.05	1.68	9.74	4.06	1.69	9.77
Panax ginseng	BLOOD ALBUMIN DECREASED	4	9.37	3.51	25.02	9.37	3.51	25.04
Zingiber officinale	BLOOD ALBUMIN DECREASED	5	10.19	4.23	24.53	10.2	4.23	24.58
Papaver somniferum	HYPOTENSION	3	4.64	1.45	14.81	4.64	1.45	14.81
Centella asiatica	HYPOTENSION	5	9.74	3.87	24.51	9.74	3.87	24.51
Papaver somniferum	DEHYDRATION	4	8.12	2.95	22.38	8.13	2.95	22.41
Senna alexandrina	DEHYDRATION	521	4.21	3.86	4.59	4.23	3.87	4.62
Glycyrrhiza glabra	DEHYDRATION	45	3.58	2.66	4.82	3.58	2.66	4.82
Ruscus aculeatus	DEHYDRATION	5	25.17	9.57	66.2	25.17	9.57	66.21
Vaccinium macrocarpon	MOVEMENT DISORDER	27	3.36	2.3	4.9	3.37	2.31	4.92
Ginkgo biloba	SOMNOLENCE	75	3.25	2.58	4.09	3.25	2.58	4.09
Pygeum africanum	SOMNOLENCE	5	9.59	3.81	24.13	9.59	3.81	24.14
Valeriana officinalis	SOMNOLENCE	7	7.02	3.25	15.16	7.02	3.25	15.16
Hypericum perforatum	SOMNOLENCE	29	3.52	2.43	5.1	3.52	2.43	5.1
Cannabis sativa	HALLUCINATION	43	3.17	2.35	4.28	3.17	2.35	4.28
Olea europaea	HALLUCINATION	12	10.43	5.86	18.57	10.43	5.86	18.58
Plantago afra	DRUG ADMINISTRATION ERROR	3	25.52	7.83	83.21	25.52	7.83	83.22
Plantago caffra	DRUG ADMINISTRATION ERROR	3	29.04	8.85	95.33	29.04	8.85	95.34
Ginkgo biloba	DISORIENTATION	19	3.19	2.03	5.01	3.2	2.04	5.03
Crataegus laevigata	DISORIENTATION	3	15.08	4.75	47.89	15.09	4.75	47.93
Hypericum perfoliatum	MANIA	3	20.57	6.55	64.63	20.58	6.55	64.68
Hypericum perforatum	MANIA	11	12.76	7.04	23.13	12.77	7.04	23.17
Cannabis sativa	MANIA	20	4.87	3.14	7.55	4.88	3.14	7.58
Rhodiola rosea	MANIA	3	136.42	40.38	460.92	136.46	40.37	461.23
Cola nitida	MANIA	3	518.38	123.9	2168.81	518.56	123.91	2170.25
Camellia sinensis	MANIA	4	3.47	1.3	9.26	3.47	1.3	9.27
Withania somnifera	MANIA	3	45.47	14.24	145.16	45.49	14.24	145.28
Panax ginseng	MANIA	7	8.32	3.95	17.51	8.32	3.95	17.52
Hypericum perfoliatum	ABNORMAL BEHAVIOUR	3	7.38	2.35	23.19	7.38	2.35	23.19
Hypericum perforatum	ABNORMAL BEHAVIOUR	14	5.85	3.45	9.92	5.85	3.45	9.93
Cannabis sativa	ABNORMAL BEHAVIOUR	44	3.87	2.88	5.21	3.88	2.88	5.22
Glycine max	CIRCULATORY COLLAPSE	11	15.9	8.76	28.86	15.92	8.76	28.92
Chenopodium album	CHEST DISCOMFORT	3	17.71	5.41	57.93	17.71	5.41	57.93
Juniperus ashei	CHEST DISCOMFORT	4	36.6	12.51	107.08	36.61	12.51	107.11
Paspalum notatum	CHEST DISCOMFORT	5	35.19	13.51	91.64	35.2	13.52	91.67
Paspalum nudatum	CHEST DISCOMFORT	3	34.31	10	117.75	34.32	10	117.79
Liquidambar styraciflua	CHEST DISCOMFORT	3	137.26	30.72	613.28	137.27	30.72	613.36
Ulmus americana	CHEST DISCOMFORT	5	83.19	28.91	239.42	83.2	28.91	239.47
Artemisia vulgaris	CHEST DISCOMFORT	3	14.45	4.46	46.81	14.45	4.46	46.81
Sorghum halepense	CHEST DISCOMFORT	4	23.61	8.33	66.88	23.62	8.34	66.92
Platanus occidentalis	CHEST DISCOMFORT	3	45.75	12.91	162.12	45.76	12.91	162.17
Acer negundo	CHEST DISCOMFORT	5	101.67	34.07	303.36	101.69	34.08	303.45
Ambrosia artemisiifolia	CHEST DISCOMFORT	6	20.33	8.75	47.25	20.34	8.75	47.28
Populus deltoides	CHEST DISCOMFORT	3	36.6	10.6	126.42	36.6	10.6	126.43
Eupatorium capillifolium	CHEST DISCOMFORT	8	3.37	1.67	6.78	3.37	1.67	6.78
Cynodon dactylon	CHEST DISCOMFORT	4	18.3	6.55	51.15	18.3	6.55	51.15
Lolium perenne	CHEST DISCOMFORT	3	78.43	20.28	303.29	78.44	20.28	303.35
Phleum pratense	CHEST DISCOMFORT	5	16.05	6.43	40.04	16.06	6.44	40.07
Melaleuca alternifolia	DRUG INEFFECTIVE	13	5.1	2.74	9.48	5.1	2.74	9.48
Allium salinum	PRURITUS	13	5.58	3.16	9.84	5.58	3.16	9.84
Allium sativum	PRURITUS	141	3.07	2.59	3.64	3.07	2.59	3.64
Aloe vera	PRURITUS	23	3.03	1.99	4.6	3.03	1.99	4.6
Avena sativa	PRURITUS	4	5.93	2.13	16.54	5.93	2.13	16.54
Avena sativa	PRURITUS	3	11.67	3.4	40.05	11.67	3.4	40.05
Amaranthus retroflexus	PRURITUS	6	31.13	11.68	82.94	31.13	11.68	82.95
Salsola kali	PRURITUS	6	53.36	17.93	158.78	53.36	17.93	158.78
Paspalum notatum	PRURITUS	5	11.97	4.6	31.17	11.97	4.6	31.17
Sorghum halepense	PRURITUS	8	18.44	8.38	40.59	18.45	8.38	40.61
Plantago lanceolata	PRURITUS	7	16.14	7.03	37.06	16.14	7.03	37.06
Juniperus virginiana	PRURITUS	3	9.34	2.78	31.43	9.34	2.78	31.43
Platanus occidentalis	PRURITUS	3	15.56	4.39	55.14	15.56	4.39	55.14
Populus deltoides	PRURITUS	5	23.94	8.53	67.15	23.94	8.53	67.15
Ulmus americana	PRURITUS	3	14.37	4.09	50.43	14.37	4.09	50.43
Morus alba	PRURITUS	6	28.73	10.92	75.59	28.73	10.92	75.59
Juglans nigra	PRURITUS	3	15.56	4.39	55.14	15.56	4.39	55.14
Eupatorium capillifolium	PRURITUS	22	3.25	2.12	4.99	3.25	2.12	4.99
Chenopodium album	PRURITUS	7	16.14	7.03	37.06	16.14	7.03	37.06
Carya illinoiensis	PRURITUS	3	9.34	2.78	31.43	9.34	2.78	31.43
Theobroma cacao	PRURITUS	6	4.73	2.06	10.85	4.73	2.06	10.85
Carya illinoinensis	PRURITUS	3	9.34	2.78	31.43	9.34	2.78	31.43
Withania somnifera	PRURITUS	4	4.45	1.61	12.27	4.45	1.61	12.27
Allium salinum	LIP SWELLING	3	10.17	3.24	31.88	10.17	3.24	31.88
Allium sativum	LIP SWELLING	20	3.52	2.27	5.46	3.53	2.27	5.48
Salsola kali	NASAL CONGESTION	3	111.31	30.64	404.43	111.33	30.64	404.56
Zingiber officinale	PALLOR	4	3.08	1.15	8.22	3.08	1.15	8.23
Centella asiatica	CONGESTIVE CARDIOMYOPATHY	5	326.65	129.9	821.38	327.31	129.94	824.44
Ginkgo biloba	CARDIOMEGALY	8	3.43	1.71	6.87	3.43	1.71	6.87
Cannabis sativa	CARDIOMEGALY	12	3.05	1.73	5.37	3.05	1.73	5.38
Paspalum notatum	WHEEZING	3	44.79	13.62	147.32	44.79	13.62	147.34
Sorghum halepense	WHEEZING	3	39.19	12	127.97	39.2	12	128.03
Carya illinoinensis	WHEEZING	3	62.7	18.63	210.98	62.71	18.63	211.06
Rhamnus purshiana	NAUSEA	3	4.15	1.21	14.24	4.15	1.21	14.24
Convallaria majalis	NAUSEA	9	3.9	1.92	7.92	3.9	1.92	7.92
Crataegus laevigata	NAUSEA	9	3.11	1.55	6.25	3.11	1.55	6.25
Fraxinus americana	NAUSEA	3	5.53	1.56	19.6	5.53	1.56	19.6
Salsola kali	NAUSEA	4	9.83	3.03	31.92	9.83	3.03	31.92
Senna alexandrina	SEROTONIN SYNDROME	61	4.12	3.21	5.29	4.14	3.22	5.33
Hypericum perfoliatum	SEROTONIN SYNDROME	7	57.33	26.77	122.76	57.38	26.78	122.95
Hypericum perforatum	SEROTONIN SYNDROME	34	47.05	33.38	66.31	47.26	33.48	66.71
Cannabis sativa	OVERDOSE	155	5.59	4.76	6.56	5.6	4.77	6.58
Hypericum perforatum	OVERDOSE	20	3.34	2.14	5.21	3.34	2.14	5.21
Triticum aestivum	OVERDOSE	43	10.93	8	14.93	10.93	8	14.93
Aloe vera	NERVOUS SYSTEM DISORDER	4	3	1.12	8.02	3	1.12	8.03
Cannabis sativa	PSYCHOTIC DISORDER	44	6.31	4.69	8.49	6.32	4.69	8.51
Hypericum perforatum	PSYCHOTIC DISORDER	11	7.46	4.11	13.53	7.46	4.11	13.53
Cannabis sativa	SUICIDAL BEHAVIOUR	13	13.32	7.74	22.92	13.4	7.76	23.14
Cannabis sativa	ALCOHOL POISONING	21	32.21	21.04	49.3	32.7	21.22	50.39
Cannabis sativa	SUICIDE ATTEMPT	55	4.3	3.3	5.61	4.3	3.29	5.61
Hypericum perforatum	SUICIDE ATTEMPT	19	7.07	4.48	11.15	7.08	4.49	11.17
Silybum marianum	EYE PAIN	15	3.43	2.06	5.7	3.43	2.06	5.7
Amaranthus retroflexus	EYE PRURITUS	4	251.8	82.9	764.82	251.92	82.9	765.5
Juniperus ashei	EYE PRURITUS	3	125.9	37.56	422.01	125.95	37.56	422.34
Paspalum notatum	EYE PRURITUS	3	94.43	28.71	310.55	94.46	28.71	310.77
Fagus grandifolia	EYE PRURITUS	4	881.31	220.44	3523.37	881.73	220.48	3526.22
Sorghum halepense	EYE PRURITUS	3	82.62	25.3	269.76	82.65	25.3	269.96
Platanus occidentalis	EYE PRURITUS	3	220.33	62.19	780.64	220.41	62.19	781.21
Plantago lanceolata	EYE PRURITUS	3	85.29	26.08	278.93	85.32	26.08	279.14
Ambrosia artemisiifolia	EYE PRURITUS	3	46.38	14.53	148.07	46.4	14.53	148.19
Juniperus virginiana	EYE PRURITUS	3	132.2	39.29	444.81	132.24	39.29	445.11
Allium sativum	EYE PRURITUS	12	3.54	2.01	6.24	3.54	2.01	6.24
Amaranthus retroflexus	THROAT IRRITATION	8	340.64	134.46	863	340.8	134.49	863.61
Juniperus ashei	THROAT IRRITATION	4	85.16	29.11	249.13	85.18	29.11	249.24
Quercus rubra	THROAT IRRITATION	4	283.87	80.11	1005.86	283.94	80.12	1006.29
Paspalum notatum	THROAT IRRITATION	6	102.19	41.93	249.07	102.23	41.93	249.23
Paspalum nudatum	THROAT IRRITATION	4	113.55	37.69	342.1	113.57	37.69	342.23
Sorghum halepense	THROAT IRRITATION	11	195.16	95.61	398.34	195.28	95.64	398.71
Platanus occidentalis	THROAT IRRITATION	8	486.63	176.48	1341.83	486.86	176.53	1342.76
Salix nigra	THROAT IRRITATION	4	243.32	71.23	831.13	243.37	71.24	831.45
Carya ovata	THROAT IRRITATION	4	851.61	155.99	4649.3	851.81	156	4651.01
Plantago lanceolata	THROAT IRRITATION	9	153.29	71.56	328.36	153.37	71.58	328.62
Ambrosia artemisiifolia	THROAT IRRITATION	9	75.14	37	152.6	75.18	37.01	152.73
Acer negundo	THROAT IRRITATION	4	170.32	53.42	543.01	170.36	53.42	543.25
Solanum lycopersicum	THROAT IRRITATION	4	121.66	40.05	369.57	121.69	40.05	369.74
Juniperus virginiana	THROAT IRRITATION	4	89.64	30.5	263.47	89.66	30.5	263.58
Iris germanica	THROAT IRRITATION	4	212.9	64.11	706.96	212.95	64.12	707.26
Triticum aestivum	THROAT IRRITATION	5	4.08	1.69	9.84	4.08	1.69	9.84
Fagus grandifolia	THROAT IRRITATION	4	425.8	106.5	1702.44	425.9	106.51	1703.12
Populus deltoides	THROAT IRRITATION	4	121.66	40.05	369.57	121.69	40.05	369.74
Juglans nigra	THROAT IRRITATION	4	154.84	49.31	486.23	154.87	49.31	486.42
Juglans regia	THROAT IRRITATION	4	1703.22	190.37	15238.4	1703.61	190.4	15243.4
Carya illinoiensis	THROAT IRRITATION	4	89.64	30.5	263.47	89.66	30.5	263.58
Theobroma cacao	THROAT IRRITATION	4	21.03	7.71	57.38	21.03	7.71	57.4
Carya illinoinensis	THROAT IRRITATION	4	89.64	30.5	263.47	89.66	30.5	263.58
Vaccinium macrocarpon	MUSCULOSKELETAL PAIN	48	3.23	2.43	4.29	3.24	2.44	4.31
Plantago notata	ABDOMINAL DISTENSION	7	3.88	1.83	8.21	3.88	1.83	8.21
Plantago ovata	ABDOMINAL DISTENSION	7	3.86	1.83	8.16	3.86	1.83	8.16
Aloe vera	ABDOMINAL DISTENSION	9	3.24	1.68	6.26	3.24	1.68	6.27
Plantago notata	FLATULENCE	8	7.98	3.96	16.1	7.98	3.96	16.1
Plantago ovata	FLATULENCE	8	7.93	3.93	15.99	7.93	3.93	16
Aloe vera	FLATULENCE	9	5.81	3.01	11.23	5.81	3	11.24
Panax ginseng	FLATULENCE	8	3.46	1.72	6.94	3.46	1.72	6.95
Camellia sinensis	FLATULENCE	11	3.49	1.93	6.32	3.49	1.93	6.32
Convallaria majalis	FLATULENCE	3	16.53	5.18	52.78	16.53	5.18	52.79
Crataegus laevigata	FLATULENCE	3	13.46	4.24	42.74	13.46	4.24	42.75
Aloe vera	ILL-DEFINED DISORDER	6	7.54	3.37	16.86	7.54	3.37	16.87
Valeriana officinalis	Insomnia	7	4.86	2.25	10.49	4.86	2.25	10.49
Hedera helix	Insomnia	4	10.19	3.54	29.37	10.19	3.54	29.37
Glycine max	Hypoglycaemia	10	5.41	2.9	10.11	5.41	2.89	10.11
Panax ginseng	Ataxia	3	5.4	1.74	16.78	5.41	1.74	16.82
Ginkgo biloba	Balance disorder	49	4.61	3.47	6.12	4.61	3.47	6.12
Vaccinium macrocarpon	Balance disorder	89	4.56	3.7	5.63	4.57	3.7	5.64
Cannabis sativa	Drug dependence	166	21.92	18.77	25.6	22.13	18.92	25.88
Vaccinium macrocarpon	Tricuspid valve incompetence	9	3.78	1.97	7.27	3.78	1.96	7.28
Allium salinum	Swelling face	3	5.12	1.63	16.05	5.12	1.63	16.05
Solanum lycopersicum	Swelling face	3	52.86	15.3	182.58	52.86	15.3	182.6
Plantago lanceolata	Swelling face	3	25.58	7.82	83.67	25.58	7.82	83.68
Senna alexandrina	Hypophagia	90	4.64	3.78	5.7	4.67	3.79	5.75
Atropa belladonna	Urticaria	14	3.3	1.94	5.61	3.3	1.94	5.61
Ambrosia artemisiifolia	Urticaria	17	47.4	27.04	83.1	47.41	27.04	83.13
Paspalum notatum	Urticaria	11	65.94	31.6	137.61	65.95	31.6	137.65
Paspalum nudatum	Urticaria	6	55.33	21.03	145.57	55.34	21.03	145.6
Sorghum halepense	Urticaria	10	47.95	23.03	99.83	47.96	23.03	99.86
Plantago lanceolata	Urticaria	7	31.08	13.54	71.37	31.08	13.53	71.37
Kochia scoparia	Urticaria	3	179.82	30.05	1076.17	179.83	30.05	1076.27
Platanus occidentalis	Urticaria	5	59.94	20.49	175.36	59.95	20.49	175.4
Salix nigra	Urticaria	3	44.96	11.93	169.47	44.96	11.93	169.48
Acer negundo	Urticaria	3	32.7	9.12	117.21	32.7	9.12	117.22
Chenopodium album	Urticaria	6	25.69	10.64	62.04	25.69	10.64	62.05
Lolium perenne	Urticaria	3	51.38	13.29	198.69	51.38	13.29	198.7
Ulmus americana	Urticaria	4	39.96	12.89	123.9	39.96	12.89	123.9
Carya illinoinensis	Urticaria	4	25.24	8.59	74.19	25.24	8.59	74.19
Urtica dioica	Urticaria	3	13.32	4.04	43.91	13.32	4.04	43.91
Morus alba	Urticaria	4	31.97	10.61	96.32	31.97	10.61	96.33
Ginkgo biloba	Blood pressure systolic increased	8	4.69	2.34	9.39	4.7	2.35	9.42
Hypericum perfoliatum	Heart rate increased	3	4.18	1.33	13.13	4.18	1.33	13.14
Hypericum perforatum	Heart rate increased	21	5.01	3.25	7.73	5.01	3.25	7.73
Populus alba	Heart rate increased	3	21.04	6.35	69.68	21.04	6.35	69.69
Aloe vera	Epistaxis	14	6.96	4.09	11.84	6.96	4.09	11.84
Ginkgo biloba	Confusional state	60	3.03	2.34	3.92	3.03	2.34	3.92
Hypericum perfoliatum	Confusional state	6	5.05	2.23	11.46	5.05	2.23	11.46
Hypericum perforatum	Confusional state	30	4.28	2.97	6.17	4.28	2.97	6.17
Plantago afra	Confusional state	3	9.42	2.89	30.71	9.42	2.89	30.72
Plantago caffra	Confusional state	3	10.71	3.26	35.16	10.71	3.26	35.16
Medicago sativa	Confusional state	6	4.44	1.96	10.05	4.44	1.96	10.05
Eleutherococcus senticosus	Confusional state	3	20.71	6	71.54	20.72	6	71.57
Valeriana officinalis	Confusional state	5	5.75	2.34	14.15	5.75	2.34	14.15
Viscum album	Confusional state	5	28.77	10.68	77.49	28.77	10.68	77.49
Cannabis sativa	Suicidal ideation	98	4.78	3.91	5.84	4.79	3.92	5.86
Hypericum perforatum	Suicidal ideation	51	12.23	9.21	16.25	12.25	9.22	16.28
Paspalum notatum	Flushing	4	19.22	6.73	54.93	19.22	6.73	54.93
Paspalum nudatum	Flushing	3	24.33	7.09	83.5	24.33	7.09	83.5
Sorghum halepense	Flushing	4	16.74	5.91	47.42	16.74	5.91	47.42
Plantago lanceolata	Flushing	5	22.37	8.66	57.79	22.37	8.66	57.79
Kochia scoparia	Flushing	3	194.61	32.52	1164.68	194.62	32.52	1164.79
Ambrosia artemisiifolia	Flushing	6	14.42	6.2	33.52	14.42	6.2	33.52
Chenopodium album	Flushing	4	17.3	6.09	49.11	17.3	6.09	49.11
Morus alba	Flushing	3	24.33	7.09	83.5	24.33	7.09	83.5
Curcuma longa	Hepatic necrosis	5	7.19	2.99	17.28	7.21	3	17.36
Camellia siangensis	Hepatic necrosis	3	196.55	61.17	631.54	196.79	61.16	633.17
Camellia sinensis	Hepatic necrosis	5	15.14	6.29	36.42	15.17	6.29	36.56
Pelargonium sidoides	Drug-induced liver injury	4	517.72	162.42	1650.27	518.09	162.44	1652.41
Papaver somniferum	General physical health deterioration	5	16.91	6.77	42.21	16.91	6.77	42.22
Hypericum perfoliatum	General physical health deterioration	4	6.06	2.24	16.4	6.06	2.24	16.4
Hypericum perforatum	Mental disorder	7	3.85	1.83	8.1	3.85	1.83	8.11
Echinacea angustifolia	Alanine aminotransferase increased	3	30.09	9.03	100.21	30.09	9.03	100.22
Glycyrrhiza glabra	Alanine aminotransferase increased	39	6.15	4.48	8.45	6.16	4.48	8.47
Silybum marianum	Alanine aminotransferase increased	26	3.38	2.3	4.98	3.38	2.29	4.98
Scutellaria lateriflora	Alanine aminotransferase increased	4	922.8	103.14	8256.3	922.92	103.15	8257.83
Plantago notata	CONSTIPATION	30	9.98	6.85	14.53	9.98	6.85	14.53
Plantago ovata	CONSTIPATION	30	9.91	6.81	14.43	9.92	6.81	14.44
Senna alexandrina	CONSTIPATION	757	5.23	4.86	5.62	5.28	4.91	5.68
Aloe vera	CONSTIPATION	16	3.25	1.98	5.35	3.25	1.97	5.35
Plantago afra	CONSTIPATION	6	19.5	8.12	46.85	19.5	8.12	46.85
Plantago caffra	CONSTIPATION	5	18.05	6.95	46.87	18.05	6.95	46.87
Vaccinium macrocarpon	CONSTIPATION	119	3.09	2.57	3.71	3.09	2.57	3.71
Convallaria majalis	CONSTIPATION	5	8.86	3.55	22.13	8.86	3.55	22.13
Crataegus laevigata	CONSTIPATION	5	7.17	2.89	17.78	7.17	2.89	17.78
Plantago notata	ABDOMINAL PAIN UPPER	13	3.81	2.19	6.64	3.81	2.19	6.64
Plantago ovata	ABDOMINAL PAIN UPPER	13	3.79	2.18	6.6	3.79	2.18	6.6
Allium salinum	ABDOMINAL PAIN UPPER	7	4.22	1.98	9	4.22	1.98	9
Aloe vera	ABDOMINAL PAIN UPPER	21	4.02	2.6	6.22	4.02	2.6	6.22
Hypericum perforatum	ABDOMINAL PAIN UPPER	27	3.37	2.3	4.95	3.37	2.29	4.95
Tanacetum parthenium	ABDOMINAL PAIN UPPER	6	7.91	3.43	18.22	7.91	3.43	18.22
Trifolium pratense	ABDOMINAL PAIN UPPER	6	13.99	5.92	33.04	13.99	5.92	33.05
Cynodon dactylon	RASH	4	5.01	1.79	14	5.01	1.79	14
Avena sativa	RASH	3	3.5	1.09	11.28	3.5	1.09	11.28
Senna alexandrina	NEUTROPHIL COUNT DECREASED	134	5.01	4.23	5.93	5.05	4.26	5.99
Arnica montana	WHITE BLOOD CELL COUNT DECREASED	4	14.34	5.19	39.62	14.35	5.19	39.65
Atropa belladonna	DYSARTHRIA	8	6.32	3.14	12.7	6.33	3.15	12.73
Cannabis sativa	DYSARTHRIA	27	3.11	2.13	4.54	3.11	2.13	4.54
Ginkgo biloba	TINNITUS	36	6.68	4.81	9.28	6.69	4.81	9.3
Silybum marianum	TINNITUS	20	4.33	2.79	6.73	4.33	2.79	6.73
Vaccinium macrocarpon	SEDATION	19	3.59	2.29	5.63	3.6	2.29	5.65
Senna alexandrina	ODYNOPHAGIA	25	5.06	3.42	7.48	5.11	3.44	7.58
Ginkgo biloba	HYPERKALAEMIA	15	3.61	2.17	6	3.62	2.18	6.02
Senna alexandrina	HYPERKALAEMIA	152	5.22	4.45	6.12	5.27	4.49	6.19
Papaver somniferum	HYPERKALAEMIA	4	35.48	12.88	97.77	35.49	12.88	97.83
Glycine max	HYPERKALAEMIA	4	3.49	1.31	9.33	3.49	1.31	9.33
Senna alexandrina	ANAEMIA	549	3.22	2.96	3.51	3.23	2.97	3.52
Zingiber officinale	ANAEMIA	54	5.73	4.35	7.55	5.74	4.36	7.56
Medicago sativa	ANAEMIA	6	3.59	1.59	8.13	3.59	1.59	8.13
Senna alexandrina	VENTRICULAR EXTRASYSTOLES	49	4.11	3.11	5.43	4.14	3.12	5.49
Glycine max	VENTRICULAR EXTRASYSTOLES	3	6.42	2.07	19.96	6.42	2.06	19.97
Ginkgo biloba	HEART RATE IRREGULAR	11	3.54	1.96	6.4	3.54	1.96	6.4
Cannabis sativa	PUPILLARY REFLEX IMPAIRED	5	9.61	4.01	23.06	9.65	4.01	23.25
Serenoa repens	VISUAL FIELD DEFECT	5	4.65	1.93	11.18	4.66	1.94	11.21
Aloe vera	ERYTHEMA	19	4.48	2.83	7.09	4.48	2.83	7.09
Paspalum notatum	ERYTHEMA	9	46	21.18	99.9	46.01	21.18	99.93
Paspalum nudatum	ERYTHEMA	6	51.9	19.73	136.54	51.9	19.73	136.55
Phleum pratense	ERYTHEMA	5	9.86	3.95	24.6	9.86	3.95	24.6
Salsola kali	ERYTHEMA	3	33.73	9.28	122.56	33.74	9.29	122.6
Sorghum halepense	ERYTHEMA	8	33.32	15.14	73.34	33.32	15.14	73.34
Plantago lanceolata	ERYTHEMA	7	29.15	12.69	66.94	29.16	12.7	66.96
Juniperus ashei	ERYTHEMA	3	16.06	4.79	53.84	16.06	4.79	53.84
Ambrosia artemisiifolia	ERYTHEMA	10	22.49	11.41	44.34	22.49	11.41	44.35
Ginkgo biloba	COLD SWEAT	12	5.08	2.88	8.96	5.09	2.88	8.98
Cannabis sativa	BRAIN DEATH	9	12.56	6.54	24.11	12.63	6.55	24.34
Ginkgo biloba	HAEMORRHAGIC STROKE	5	4.58	1.91	11.01	4.58	1.9	11.02
Cannabis sativa	APNOEA	14	7.08	4.19	11.96	7.1	4.2	12.01
Plantago notata	GASTROOESOPHAGEAL REFLUX DISEASE	5	3.3	1.36	7.98	3.3	1.36	7.98
Plantago ovata	GASTROOESOPHAGEAL REFLUX DISEASE	5	3.28	1.36	7.93	3.28	1.36	7.93
Serenoa repens	SLEEP APNOEA SYNDROME	13	5.84	3.39	10.07	5.85	3.39	10.1
Ginkgo biloba	AMNESIA	30	3.33	2.32	4.77	3.33	2.32	4.78
Medicago sativa	AMNESIA	4	6.51	2.41	17.58	6.51	2.41	17.59
Panax ginseng	AMNESIA	10	3.19	1.71	5.95	3.19	1.71	5.95
Zingiber officinale	AMNESIA	13	3.61	2.09	6.24	3.62	2.09	6.26
Hypericum perforatum	AMNESIA	10	3.1	1.66	5.78	3.1	1.66	5.79
Olea europaea	AMNESIA	5	3.78	1.56	9.15	3.78	1.56	9.15
Melaleuca alternifolia	LUNG DISORDER	3	23.54	7.36	75.32	23.54	7.36	75.34
Ruscus aculeatus	DIABETIC KETOACIDOSIS	5	206.32	78.46	542.56	206.46	78.47	543.21
Hypericum perforatum	VISION BLURRED	36	6.35	4.54	8.87	6.35	4.54	8.88
Camellia sinensis	PANCREATITIS ACUTE	5	3.79	1.57	9.12	3.79	1.57	9.13
Plantago notata	CHOLELITHIASIS	4	5	1.87	13.4	5	1.86	13.41
Plantago ovata	CHOLELITHIASIS	4	4.97	1.85	13.32	4.97	1.85	13.32
Glycine max	HYPERLIPIDAEMIA	4	6.15	2.3	16.44	6.15	2.3	16.45
Linum usitatissimum	JOINT SWELLING	32	3.77	2.66	5.35	3.78	2.66	5.36
Aloe vera	JOINT SWELLING	10	3.94	2.11	7.37	3.94	2.11	7.37
Vaccinium macrocarpon	GROIN PAIN	7	3.37	1.61	7.07	3.37	1.6	7.08
Hypericum perfoliatum	HEPATIC FAILURE	5	19.5	7.98	47.67	19.5	7.97	47.68
Hypericum perforatum	HEPATIC FAILURE	5	3.22	1.34	7.76	3.22	1.34	7.76
Plantago notata	HEPATIC FAILURE	3	4.53	1.45	14.12	4.53	1.45	14.12
Plantago ovata	HEPATIC FAILURE	3	4.5	1.44	14.02	4.51	1.45	14.06
Camellia siangensis	HEPATIC FAILURE	3	31.53	9.81	101.37	31.54	9.81	101.42
Camellia sinensis	HEPATIC FAILURE	8	3.9	1.95	7.82	3.9	1.94	7.82
Passiflora incarnata	HEPATIC FAILURE	3	58.02	17.52	192.15	58.04	17.52	192.25
Punica granatum	GOUT	5	49.56	20.2	121.59	49.59	20.2	121.74
Silybum marianum	NEUROPATHY PERIPHERAL	25	3.43	2.31	5.09	3.43	2.31	5.09
Ginkgo biloba	DISTURBANCE IN ATTENTION	29	4.22	2.93	6.09	4.23	2.93	6.1
Hypericum perfoliatum	DISTURBANCE IN ATTENTION	3	7.22	2.3	22.69	7.22	2.3	22.69
Hypericum perforatum	DISTURBANCE IN ATTENTION	40	16.95	12.33	23.3	16.98	12.35	23.35
Crataegus laevigata	ALOPECIA	4	7.7	2.81	21.1	7.7	2.81	21.1
Convallaria majalis	Therapy cessation	3	55.13	17.27	176	55.16	17.27	176.18
Crataegus laevigata	Therapy cessation	3	44.89	14.14	142.53	44.91	14.14	142.66
Zingiber officinale	Abdominal discomfort	31	5.32	3.72	7.61	5.33	3.72	7.63
Vaccinium macrocarpon	International normalised ratio increased	44	4.16	3.09	5.6	4.17	3.1	5.61
Peumus boldus	International normalised ratio increased	3	67.91	19.79	233.05	67.92	19.79	233.12
Taraxacum officinale	International normalised ratio increased	4	12.71	4.69	34.44	12.71	4.69	34.45
Ginkgo biloba	Prothrombin time prolonged	6	4.75	2.13	10.58	4.75	2.13	10.59
Senna alexandrina	Blood potassium decreased	86	3.26	2.64	4.03	3.27	2.64	4.04
Glycyrrhiza glabra	Blood potassium decreased	8	3	1.5	6.01	3	1.5	6.01
Hypericum perfoliatum	Renal failure	4	4.2	1.55	11.37	4.2	1.55	11.37
Carica papaya	Drug effect decreased	3	3.5	1.12	10.97	3.5	1.12	10.97
Tanacetum parthenium	Drug effect decreased	4	10.32	3.77	28.25	10.32	3.77	28.26
Salsola kali	Product substitution issue	6	306.21	102.92	911.08	306.3	102.93	911.5
Ginkgo biloba	Angina pectoris	15	3.42	2.06	5.68	3.42	2.06	5.68
Ginkgo biloba	Mass	8	4.98	2.49	9.97	4.98	2.49	9.98
Ginkgo biloba	Panic attack	22	4.59	3.02	6.98	4.59	3.01	6.99
Hypericum perforatum	Panic attack	32	19.27	13.53	27.45	19.31	13.55	27.52
Cannabis sativa	Panic attack	28	3.45	2.38	5	3.45	2.38	5.01
Hypericum perforatum	Stress	9	3.34	1.73	6.44	3.34	1.73	6.45
Plantago notata	Stress	4	3.48	1.3	9.33	3.48	1.3	9.33
Plantago ovata	Stress	4	3.46	1.29	9.27	3.46	1.29	9.28
Arnica montana	Cardiac disorder	3	9.24	2.89	29.55	9.24	2.89	29.55
Cannabis sativa	Drug withdrawal syndrome	90	5.43	4.41	6.69	5.44	4.41	6.71
Ginkgo biloba	Memory impairment	47	3.21	2.4	4.29	3.22	2.41	4.3
Peumus boldus	Vaginal haemorrhage	3	65.63	19.12	225.22	65.64	19.12	225.29
Taraxacum officinale	Vaginal haemorrhage	3	9.13	2.9	28.72	9.13	2.9	28.73
Hypericum perfoliatum	Mood swings	3	10.54	3.35	33.12	10.54	3.35	33.12
Hypericum perforatum	Mood swings	30	18.29	12.7	26.34	18.32	12.71	26.4
Cannabis sativa	Cardio-respiratory arrest	118	11.3	9.41	13.57	11.35	9.44	13.64
Solanum dulcamara	Cardio-respiratory arrest	4	440.13	98.51	1966.45	440.21	98.52	1967.04
Ginkgo biloba	Syncope	41	3.22	2.36	4.39	3.23	2.37	4.4
Ginkgo biloba	Drug interaction	82	4.41	3.54	5.5	4.42	3.54	5.51
Ruscus aculeatus	Drug interaction	4	18.22	6.32	52.51	18.22	6.32	52.51
Aloe vera	Drug interaction	17	3.88	2.39	6.29	3.88	2.39	6.29
Hypericum perfoliatum	Drug interaction	21	21.25	13.32	33.91	21.26	13.32	33.93
Hypericum perforatum	Drug interaction	72	11.51	9.03	14.67	11.52	9.04	14.69
Tanacetum parthenium	Drug interaction	7	11.25	5.17	24.49	11.25	5.17	24.49
Valeriana officinalis	Drug interaction	6	7.37	3.22	16.85	7.37	3.22	16.85
Trifolium pratense	Drug interaction	6	16.82	7.12	39.73	16.82	7.12	39.73
Allium salinum	Drug interaction	7	5.07	2.38	10.82	5.07	2.38	10.82
Panax ginseng	Drug interaction	52	8.33	6.28	11.04	8.34	6.29	11.06
Echinacea purpurea	Drug interaction	3	5.86	1.83	18.72	5.86	1.83	18.72
Peumus boldus	Drug interaction	10	121.46	49.36	298.9	121.47	49.36	298.94
Piper methysticum	Drug interaction	16	48.58	26.96	87.54	48.59	26.96	87.56
Camellia siangensis	Drug interaction	3	7.13	2.22	22.92	7.13	2.22	22.93
Camellia sinensis	Drug interaction	34	3.85	2.74	5.42	3.85	2.73	5.42
Glycine max	Drug interaction	20	3.88	2.48	6.06	3.88	2.48	6.06
Cichorium intybus	Drug interaction	3	109.31	22.06	541.59	109.32	22.06	541.66
Atropa belladonna	Disease recurrence	3	4.91	1.58	15.27	4.91	1.58	15.28
Vaccinium macrocarpon	Pollakiuria	38	4.1	2.98	5.64	4.1	2.98	5.65
Vaccinium macrocarpon	Dysuria	31	3.54	2.49	5.04	3.54	2.49	5.04
Ginkgo biloba	Abasia	23	3.36	2.23	5.07	3.36	2.23	5.07
Ginkgo biloba	Visual acuity reduced	23	3.33	2.21	5.02	3.33	2.21	5.02
Aloe vera	Intentional product misuse	7	4.77	2.26	10.06	4.77	2.26	10.06
Vaccinium macrocarpon	Gait disturbance	142	3.45	2.92	4.08	3.46	2.93	4.09
Medicago sativa	Gait disturbance	11	7.39	4	13.66	7.39	4	13.66
Zingiber officinale	Gait disturbance	28	3.11	2.13	4.53	3.11	2.13	4.53
Aesculus hippocastanum	Gait disturbance	5	3.98	1.63	9.75	3.98	1.63	9.75
Vaccinium macrocarpon	Hypersomnia	18	3.03	1.91	4.81	3.03	1.91	4.82
Hypericum perfoliatum	Hepatic enzyme increased	3	7.36	2.34	23.13	7.37	2.35	23.16
Senna alexandrina	Inguinal hernia	16	3.08	1.89	5.02	3.09	1.89	5.05
Panax ginseng	Thrombosis in device	5	19.28	8.01	46.42	19.31	8.01	46.57
Melaleuca alternifolia	Rheumatoid arthritis	3	12.78	3.99	40.9	12.78	3.99	40.9
Amaranthus retroflexus	Rhinorrhoea	3	73.78	21.36	254.84	73.79	21.36	254.91
Juglans nigra	Rhinorrhoea	3	92.22	26.03	326.78	92.23	26.02	326.86
Plantago lanceolata	Rhinorrhoea	4	49.18	17.33	139.59	49.19	17.33	139.64
Ginkgo biloba	Sensory disturbance	9	3.93	2.04	7.56	3.94	2.05	7.59
Sorghum halepense	Anaphylactic reaction	3	36.04	11.04	117.68	36.04	11.04	117.7
Cynodon dactylon	Anaphylactic reaction	4	38.44	13.75	107.43	38.45	13.76	107.48
Phleum pratense	Anaphylactic reaction	9	65.27	32.2	132.29	65.3	32.21	132.39
Aloe vera	Local swelling	4	3.44	1.29	9.2	3.44	1.29	9.2
Chenopodium album	Local reaction	5	4540.06	1770.25	11643.6	4622.89	1776.35	12030.9
Lolium perenne	Local reaction	3	11285.3	2933.14	43420.4	11408	2934.82	44343.9
Paspalum notatum	Local reaction	6	6319.77	2612.78	15286.2	6458.64	2628.8	15868.1
Sorghum halepense	Local reaction	7	6583.09	2899.7	14945.4	6752.48	2924.65	15590.2
Ulmus americana	Local reaction	4	8777.45	2848.18	27050.1	8905.11	2854.4	27782
Carya illinoinensis	Local reaction	5	7314.55	2734.67	19564.6	7448	2745.78	20202.9
Fraxinus americana	Local reaction	4	9575.4	3067.42	29891	9714.67	3074.54	30695.6
Populus deltoides	Local reaction	3	5266.47	1533.13	18090.9	5323.71	1532.58	18492.9
Cynodon dactylon	Local reaction	6	4157.74	1771.77	9756.77	4249.1	1781.67	10133.7
Phleum pratense	Local reaction	3	1338.93	422.23	4245.84	1353.48	421.76	4343.51
Sorghum halepense	Dermatitis allergic	4	237.47	83.86	672.42	237.7	83.87	673.7
Chenopodium album	Dermatitis allergic	4	245.38	86.49	696.2	245.63	86.49	697.55
Vaccinium macrocarpon	FOOD INTERACTION	20	46.79	30.32	72.22	47.94	30.73	74.8
Panax ginseng	FOOD INTERACTION	3	36.99	11.93	114.72	37.13	11.92	115.63
Punica granatum	FOOD INTERACTION	10	929.25	486.4	1775.29	940.78	488.86	1810.46
Plantago notata	RASH ERYTHEMATOUS	3	4.22	1.35	13.15	4.22	1.35	13.16
Plantago ovata	RASH ERYTHEMATOUS	3	4.19	1.34	13.06	4.19	1.34	13.06
Cannabis sativa	ACCIDENTAL OVERDOSE	48	7.39	5.56	9.82	7.41	5.57	9.86
Aloe vera	SKIN DISCOLOURATION	7	5.96	2.83	12.57	5.96	2.83	12.57
Atropa belladonna	SKIN DISCOLOURATION	4	3.21	1.2	8.58	3.21	1.2	8.59
Cannabis sativa	Aspiration	16	6.91	4.23	11.28	6.93	4.24	11.33
Cannabis sativa	Cardiac arrest	186	9.59	8.28	11.11	9.62	8.3	11.15
Solanum dulcamara	Cardiac arrest	3	130.65	29.24	583.75	130.66	29.24	583.83
Cannabis sativa	Mydriasis	18	6.49	4.09	10.31	6.5	4.09	10.34
Valeriana officinalis	Mydriasis	4	56.19	20.65	152.89	56.23	20.65	153.1
Glycine max	Sepsis	15	4.15	2.49	6.93	4.15	2.49	6.93
Humulus lupulus	Sepsis	4	16.15	5.77	45.19	16.15	5.77	45.2
Hypericum perfoliatum	Sepsis	4	5.04	1.86	13.64	5.04	1.86	13.64
Cannabis sativa	Unresponsive to stimuli	32	5.64	3.98	7.98	5.65	3.99	8.01
Serenoa repens	Acne	12	3.5	1.98	6.17	3.51	1.99	6.19
Panax ginseng	MALNUTRITION	3	6.15	1.98	19.11	6.16	1.98	19.15
Zingiber officinale	MALNUTRITION	3	5.35	1.72	16.62	5.35	1.72	16.63
Ginkgo biloba	Bedridden	5	3.09	1.29	7.43	3.1	1.29	7.46
Pygeum africanum	Thrombocytopenia	3	10.38	3.23	33.32	10.38	3.23	33.33
Ginkgo biloba	Dementia	14	5.75	3.4	9.72	5.76	3.4	9.75
Medicago sativa	Dementia	3	18.1	5.77	56.78	18.1	5.77	56.8
Panax ginseng	Dementia	4	4.73	1.77	12.63	4.73	1.77	12.64
Zingiber officinale	Dementia	4	4.11	1.54	10.97	4.11	1.54	10.98
Senna alexandrina	Flank pain	37	4.39	3.18	6.05	4.42	3.2	6.11
Scutellaria lateriflora	Blood calcium increased	4	6762.76	756	60495.9	6768.99	756.39	60576.1
Viscum album	Cerebral haemorrhage	6	161.64	63.74	409.92	161.7	63.75	410.18
Achillea millefolium	Cardiac failure	4	15.32	5.57	42.17	15.32	5.56	42.18
Papaver somniferum	Cardiac failure	3	11.69	3.66	37.31	11.69	3.66	37.31
Centella asiatica	Cardiac failure	7	35.95	16.19	79.81	35.96	16.2	79.84
Oenothera biennis	PANCYTOPENIA	3	29.68	9.09	96.92	29.69	9.09	96.96
Hypericum perforatum	THERAPY NON-RESPONDER	3	7.7	2.48	23.92	7.71	2.48	23.97
Plantago notata	RENAL IMPAIRMENT	6	5.03	2.24	11.28	5.03	2.24	11.28
Plantago ovata	RENAL IMPAIRMENT	6	5	2.23	11.21	5	2.23	11.21
Ginkgo biloba	DERMATITIS EXFOLIATIVE	5	4.55	1.89	10.94	4.55	1.89	10.95
Ginkgo biloba	EOSINOPHILIA	7	3.91	1.86	8.21	3.91	1.86	8.22
Panax ginseng	HEPATIC FUNCTION ABNORMAL	5	3.5	1.45	8.43	3.5	1.45	8.44
Ginkgo biloba	HEPATIC CYST	4	8.35	3.13	22.24	8.36	3.13	22.32
Centella asiatica	INTERSTITIAL LUNG DISEASE	8	79.2	37.24	168.43	79.24	37.25	168.56
Senna alexandrina	PNEUMONIA ASPIRATION	105	5.38	4.44	6.51	5.43	4.48	6.59
Cannabis sativa	DELUSION	20	6.66	4.29	10.33	6.68	4.3	10.37
Aloe vera	INFLUENZA	8	3.69	1.84	7.42	3.69	1.83	7.42
Ginkgo biloba	DELIRIUM	12	3.11	1.76	5.48	3.11	1.76	5.49
Medicago sativa	DELIRIUM	3	11.41	3.64	35.79	11.41	3.64	35.8
Panax ginseng	DELIRIUM	6	4.48	2.01	10	4.48	2.01	10.01
Echinacea purpurea	DELIRIUM	3	29.13	9.12	93.05	29.14	9.12	93.11
Cannabis sativa	FIBRIN D DIMER INCREASED	3	4.23	1.37	13.11	4.24	1.37	13.17
Cannabis sativa	COMPLETED SUICIDE	165	8.7	7.44	10.17	8.73	7.46	10.21
Solanum dulcamara	COMPLETED SUICIDE	6	1076.01	129.54	8937.71	1076.17	129.55	8939.44
Cannabis sativa	APATHY	12	4	2.27	7.05	4	2.27	7.05
Hypericum perforatum	RHABDOMYOLYSIS	8	3.91	1.95	7.85	3.91	1.95	7.85
Hypericum perfoliatum	NEUTROPENIA	3	4.32	1.37	13.57	4.32	1.37	13.58
Glycine max	RESPIRATORY FAILURE	11	4.23	2.33	7.68	4.23	2.33	7.68
Senna alexandrina	ATRIOVENTRICULAR BLOCK FIRST DEGREE	19	3.98	2.54	6.23	4.01	2.55	6.3
Ginkgo biloba	ATRIOVENTRICULAR BLOCK FIRST DEGREE	3	4.42	1.43	13.71	4.43	1.43	13.76
Aloe vera	ULCER HAEMORRHAGE	3	13.2	4.24	41.05	13.21	4.24	41.12
Senna alexandrina	CARDIOACTIVE DRUG LEVEL INCREASED	11	5.69	3.16	10.24	5.74	3.17	10.4
Vitis vinifera	RED BLOOD CELL COUNT DECREASED	5	3.66	1.52	8.81	3.66	1.52	8.82
Senna alexandrina	WHITE BLOOD CELL COUNT INCREASED	200	5.14	4.47	5.91	5.19	4.51	5.97
Viscum album	OEDEMA	5	84.28	31.29	226.99	84.3	31.3	227.08
Glycyrrhiza glabra	BLOOD LACTATE DEHYDROGENASE INCREASED	22	11.77	7.73	17.92	11.79	7.74	17.97
Ginkgo biloba	PAROSMIA	6	6.51	2.92	14.5	6.52	2.92	14.54
Allium sativum	UPPER GASTROINTESTINAL HAEMORRHAGE	9	3.24	1.68	6.23	3.24	1.68	6.24
Cannabis sativa	ROAD TRAFFIC ACCIDENT	66	7.15	5.61	9.12	7.17	5.62	9.15
Hypericum perforatum	ROAD TRAFFIC ACCIDENT	7	3.54	1.68	7.45	3.54	1.68	7.45
Ginkgo biloba	PROTEIN TOTAL DECREASED	3	5.37	1.73	16.65	5.37	1.73	16.68
Panax ginseng	PROTEIN TOTAL DECREASED	5	25.89	10.76	62.32	25.95	10.76	62.6
Zingiber officinale	PROTEIN TOTAL DECREASED	7	31.57	15.02	66.34	31.68	15.04	66.75
Serenoa repens	ATELECTASIS	6	3.68	1.65	8.2	3.68	1.65	8.2
Plantago notata	Gastritis	6	10.84	4.83	24.31	10.84	4.83	24.32
Plantago ovata	Gastritis	6	10.77	4.8	24.15	10.78	4.81	24.18
Atropa belladonna	Gastritis	6	6.65	2.97	14.87	6.65	2.97	14.87
Senna alexandrina	Oral candidiasis	44	4.25	3.17	5.71	4.28	3.18	5.76
Hypericum perforatum	Pruritus generalised	10	6.41	3.44	11.96	6.41	3.43	11.97
Ginkgo biloba	Jaundice cholestatic	5	9.78	4.07	23.49	9.81	4.07	23.62
Cannabis sativa	INTENTIONAL OVERDOSE	33	3.46	2.46	4.87	3.47	2.46	4.89
Cannabis sativa	Drug abuse	284	24.69	21.88	27.85	24.95	22.09	28.18
Cannabis sativa	Poisoning	74	21.27	16.91	26.75	21.48	17.04	27.07
Solanum dulcamara	Poisoning	3	752.74	168.5	3362.77	753.05	168.51	3365.33
Cannabis sativa	Respiratory arrest	169	20.73	17.78	24.18	20.92	17.91	24.43
Solanum dulcamara	Respiratory arrest	3	312.48	69.94	1396.11	312.53	69.94	1396.53
Cannabis sativa	Toxicity to various agents	168	8.81	7.55	10.28	8.84	7.57	10.32
Trifolium pratense	Toxicity to various agents	3	12.73	3.95	41.07	12.73	3.95	41.07
Cannabis sativa	CYANOSIS	15	3.78	2.28	6.27	3.78	2.28	6.28
Solanum lycopersicum	EYELID OEDEMA	3	206.82	59.89	714.26	206.9	59.88	714.85
Theobroma cacao	EYELID OEDEMA	3	37.83	11.96	119.7	37.85	11.96	119.82
Cannabis sativa	Hallucination, auditory	28	8.27	5.71	11.99	8.3	5.72	12.05
Camellia sinensis	LIVER INJURY	4	5.24	1.96	13.98	5.24	1.96	13.99
Plantago notata	RECTAL HAEMORRHAGE	4	4.58	1.71	12.28	4.58	1.71	12.28
Plantago ovata	RECTAL HAEMORRHAGE	4	4.55	1.7	12.2	4.55	1.7	12.2
Senna alexandrina	REFUSAL OF TREATMENT BY PATIENT	35	4.62	3.32	6.43	4.66	3.34	6.5
Cannabis sativa	REFUSAL OF TREATMENT BY PATIENT	6	3.3	1.48	7.35	3.3	1.48	7.36
Cannabis sativa	ANGER	36	4.34	3.13	6.02	4.35	3.13	6.04
Ginkgo biloba	Sinus disorder	9	4.32	2.25	8.31	4.32	2.24	8.32
Glycyrrhiza glabra	Stevens-Johnson syndrome	11	4.24	2.34	7.67	4.24	2.34	7.67
Aloe vera	Stevens-Johnson syndrome	3	3.5	1.13	10.89	3.5	1.12	10.89
Hypericum perforatum	Mental impairment	10	9.12	4.89	17.02	9.13	4.89	17.04
Cannabis sativa	Laceration	12	3.2	1.82	5.64	3.2	1.81	5.64
Hypericum perfoliatum	METRORRHAGIA	4	16.82	6.22	45.51	16.82	6.21	45.53
Hypericum perforatum	METRORRHAGIA	11	7.76	4.28	14.07	7.76	4.28	14.08
Aloe vera	Rash generalised	4	3.12	1.17	8.35	3.12	1.17	8.35
Vaccinium macrocarpon	MULTIPLE SCLEROSIS	42	4.06	3	5.5	4.07	3	5.52
Hypericum perforatum	DYSTONIA	6	4.78	2.14	10.67	4.78	2.14	10.68
Vaccinium macrocarpon	URINARY INCONTINENCE	29	4.02	2.79	5.79	4.03	2.8	5.81
Ginkgo biloba	HALLUCINATION, VISUAL	7	3.04	1.45	6.38	3.04	1.45	6.39
Hypericum perfoliatum	HALLUCINATION, VISUAL	4	29.22	10.8	79.06	29.23	10.8	79.12
Hypericum perforatum	HALLUCINATION, VISUAL	11	13.48	7.44	24.44	13.5	7.44	24.49
Cannabis sativa	PHOTOPHOBIA	10	3	1.61	5.58	3	1.61	5.58
Cannabis sativa	Drug withdrawal syndrome neonatal	15	10.21	6.16	16.93	10.26	6.17	17.06
Cannabis sativa	Small for dates baby	4	3.6	1.35	9.59	3.61	1.35	9.63
Ginkgo biloba	Back disorder	8	4.1	2.05	8.21	4.1	2.05	8.21
Senna alexandrina	Diverticulum	38	4.23	3.08	5.81	4.25	3.09	5.85
Vaccinium macrocarpon	Osteopenia	9	3.1	1.61	5.96	3.1	1.61	5.97
Ginkgo biloba	Nail disorder	5	6.12	2.55	14.71	6.13	2.55	14.75
Ginkgo biloba	SELF-MEDICATION	4	6.23	2.34	16.6	6.24	2.34	16.66
Cannabis sativa	SELF-MEDICATION	10	9.24	4.97	17.16	9.27	4.98	17.27
Cannabis sativa	ELECTROENCEPHALOGRAM ABNORMAL	4	3.87	1.45	10.31	3.87	1.45	10.33
Cannabis sativa	SINUS TACHYCARDIA	23	6.9	4.58	10.39	6.92	4.59	10.43
Ginkgo biloba	SINUS TACHYCARDIA	7	3.53	1.68	7.41	3.54	1.68	7.44
Eleutherococcus senticosus	SINUS TACHYCARDIA	3	212.7	61.59	734.56	212.79	61.59	735.2
Medicago sativa	SINUS TACHYCARDIA	3	22.31	7.11	69.98	22.32	7.11	70.05
Panax ginseng	SINUS TACHYCARDIA	9	13.2	6.84	25.46	13.22	6.85	25.52
Zingiber officinale	SINUS TACHYCARDIA	4	5.06	1.9	13.51	5.07	1.9	13.54
Cannabis sativa	LEFT VENTRICULAR HYPERTROPHY	4	3.56	1.34	9.48	3.57	1.34	9.53
Vaccinium macrocarpon	DYSLIPIDAEMIA	7	5.55	2.65	11.64	5.57	2.65	11.7
Vaccinium macrocarpon	DEVICE OCCLUSION	4	3.49	1.31	9.3	3.5	1.31	9.34
Ginkgo biloba	Gallbladder disorder	11	3.46	1.91	6.26	3.46	1.91	6.26
Ginkgo biloba	Hypertonia	4	3.73	1.4	9.94	3.74	1.4	9.98
Vaccinium macrocarpon	Hypertonia	6	3.06	1.37	6.81	3.06	1.37	6.82
Ginkgo biloba	Hyperventilation	7	8.2	3.91	17.21	8.22	3.91	17.28
Atropa belladonna	Hyperventilation	3	14.23	4.58	44.24	14.25	4.58	44.35
Glycine max	Disseminated intravascular coagulation	17	27.5	16.98	44.53	27.55	17	44.65
Ginkgo biloba	Aphasia	18	4.64	2.92	7.38	4.64	2.92	7.38
Cannabis sativa	RESPIRATORY RATE INCREASED	10	5.13	2.76	9.54	5.14	2.76	9.57
Ginkgo biloba	COGNITIVE DISORDER	22	4.32	2.84	6.57	4.33	2.84	6.59
Vaccinium macrocarpon	COGNITIVE DISORDER	34	3.64	2.6	5.1	3.65	2.6	5.12
Camellia sinensis	Hepatocellular injury	5	9.02	3.75	21.71	9.02	3.74	21.73
Linum usitatissimum	Contusion	29	3.33	2.31	4.81	3.33	2.31	4.81
Plantago notata	Hiatus hernia	3	9.93	3.19	30.95	9.94	3.19	30.99
Plantago ovata	Hiatus hernia	3	9.87	3.17	30.76	9.87	3.17	30.77
Camellia sinensis	ABDOMINAL PAIN LOWER	6	3.81	1.71	8.5	3.81	1.71	8.5
Ginkgo biloba	BLOOD CHLORIDE DECREASED	3	6.25	2.02	19.37	6.26	2.02	19.45
Glycyrrhiza glabra	BLOOD CHLORIDE DECREASED	7	20.59	9.81	43.2	20.68	9.83	43.52
Vaccinium macrocarpon	SPINAL COLUMN STENOSIS	7	3.37	1.61	7.07	3.37	1.6	7.08
Viscum album	Hemiparesis	4	178.96	60.89	525.94	179.04	60.9	526.39
Hypericum perfoliatum	Aggression	3	6.46	2.06	20.3	6.46	2.06	20.3
Hypericum perforatum	Aggression	25	9.28	6.23	13.82	9.29	6.23	13.84
Cannabis sativa	Aggression	92	7.19	5.85	8.84	7.21	5.86	8.87
Cannabis sativa	Exposure during pregnancy	29	3.53	2.45	5.09	3.53	2.45	5.09
Humulus lupulus	Exposure during pregnancy	3	32.27	9.98	104.3	32.27	9.98	104.32
Senna alexandrina	Granulocytopenia	36	5.05	3.65	6.99	5.09	3.66	7.07
Cannabis sativa	Maternal drugs affecting foetus	11	3.26	1.8	5.89	3.26	1.8	5.89
Valeriana officinalis	Premature baby	4	27.88	10.24	75.87	27.88	10.24	75.9
Ginkgo biloba	Spinal pain	8	8.69	4.34	17.38	8.71	4.35	17.45
Silybum marianum	JAUNDICE	14	3.8	2.25	6.43	3.8	2.25	6.43
Hypericum perforatum	Mood altered	6	4.82	2.16	10.76	4.83	2.16	10.79
Cannabis sativa	BLOOD CALCIUM DECREASED	8	3.43	1.71	6.86	3.43	1.71	6.87
Ginkgo biloba	HAEMATURIA	18	4.01	2.52	6.38	4.01	2.52	6.38
Senna alexandrina	HAEMATURIA	104	3.29	2.71	3.99	3.3	2.72	4
Cannabis sativa	FOETAL EXPOSURE DURING PREGNANCY	65	5.69	4.45	7.27	5.7	4.46	7.29
Ginkgo biloba	RASH PUSTULAR	4	3.39	1.27	9.04	3.39	1.27	9.05
Plantago notata	LEUKOCYTOSIS	3	8.34	2.68	25.99	8.34	2.68	26
Plantago ovata	LEUKOCYTOSIS	3	8.29	2.66	25.83	8.29	2.66	25.85
Camellia sinensis	LEUKOCYTOSIS	6	5.37	2.41	11.98	5.37	2.41	11.99
Hypericum perforatum	LEUKOCYTOSIS	4	4.73	1.77	12.63	4.73	1.77	12.64
Ginkgo biloba	PSYCHOMOTOR SKILLS IMPAIRED	3	10.89	3.52	33.73	10.92	3.51	33.95
Ginkgo biloba	HEAD INJURY	14	3.73	2.21	6.31	3.73	2.2	6.31
Ginkgo biloba	CHOLESTASIS	7	3.5	1.67	7.35	3.5	1.67	7.35
Camellia sinensis	CHOLESTASIS	3	3.17	1.02	9.84	3.17	1.02	9.85
Senna alexandrina	RENAL CYST	35	4.49	3.23	6.25	4.52	3.24	6.31
Atropa belladonna	RENAL CYST	3	10.97	3.53	34.11	10.98	3.53	34.17
Vaccinium macrocarpon	RENAL CYST	10	4.92	2.65	9.14	4.93	2.65	9.18
Piper methysticum	ATRIAL FLUTTER	6	251.2	107.35	587.81	251.59	107.39	589.42
Glycine max	HYPERTHERMIA	4	15.25	5.71	40.75	15.27	5.71	40.85
Ginkgo biloba	PURPURA	6	4.7	2.11	10.47	4.7	2.11	10.48
Glycine max	METABOLIC ACIDOSIS	4	4.47	1.67	11.95	4.47	1.67	11.95
Cannabis sativa	Substance abuse	342	241.93	217.6	268.98	270.56	240.61	304.23
Cannabis sativa	Logorrhoea	3	3.19	1.03	9.89	3.19	1.03	9.9
Cannabis sativa	Euphoric mood	67	27.44	21.58	34.89	27.79	21.79	35.44
Cannabis sativa	DRUG ABUSER	155	58.51	49.92	68.58	60.11	51.06	70.76
Cannabis sativa	DRUG SCREEN POSITIVE	75	33.15	26.42	41.6	33.66	26.73	42.39
Hypericum perfoliatum	ACIDOSIS	3	47.63	15.16	149.61	47.67	15.16	149.87
Hypericum perforatum	ACIDOSIS	3	7.97	2.57	24.76	7.98	2.57	24.81
Aloe vera	PETECHIAE	3	9.91	3.19	30.82	9.91	3.18	30.84
Ginkgo biloba	PETECHIAE	6	4.64	2.08	10.33	4.64	2.08	10.35
Glycine max	SHOCK	16	20.61	12.54	33.86	20.64	12.55	33.94
Atropa belladonna	SHOCK	3	4.22	1.36	13.13	4.22	1.36	13.13
Cannabis sativa	POISONING DELIBERATE	11	20.26	11.24	36.51	20.45	11.28	37.07
Cannabis sativa	HOMICIDE	22	45.88	30.31	69.45	46.89	30.69	71.64
Cannabis sativa	TROPONIN INCREASED	8	6.46	3.23	12.91	6.47	3.23	12.96
Cannabis sativa	BLOOD BICARBONATE DECREASED	8	14.83	7.43	29.6	14.93	7.44	29.95
Cannabis sativa	BLOOD PH DECREASED	14	22.83	13.55	38.48	23.08	13.62	39.12
Cannabis sativa	PCO2 INCREASED	5	21.45	8.96	51.33	21.66	8.97	52.31
Valeriana officinalis	THINKING ABNORMAL	3	24.79	7.85	78.27	24.8	7.85	78.33
Cannabis sativa	THINKING ABNORMAL	18	3.86	2.43	6.13	3.86	2.43	6.14
Ginkgo biloba	GASTRITIS EROSIVE	4	5.71	2.14	15.22	5.72	2.14	15.27
Cannabis sativa	PULSE ABSENT	10	7.52	4.05	13.97	7.55	4.05	14.06
Cannabis sativa	Exposure via ingestion	13	11.74	6.82	20.21	11.8	6.83	20.37
Pelargonium sidoides	Hepatotoxicity	3	293.96	82.03	1053.47	294.09	82.03	1054.4
Cannabis sativa	Respiratory acidosis	3	3.93	1.27	12.18	3.93	1.27	12.2
Cannabis sativa	Miosis	8	5.81	2.91	11.62	5.82	2.91	11.66
Ginkgo biloba	Altered state of consciousness	7	3.18	1.51	6.68	3.18	1.51	6.68
Hypericum perfoliatum	Lactic acidosis	3	18.53	5.9	58.22	18.53	5.9	58.24
Hypericum perforatum	Lactic acidosis	3	3.1	1	9.63	3.1	1	9.64
Senna alexandrina	Dextrocardia	8	29.32	14.97	57.43	31.1	15.22	63.55
Silybum marianum	Head discomfort	4	3.27	1.23	8.72	3.27	1.23	8.73
Camellia siangensis	Colitis ischaemic	3	150.33	46.78	483.11	150.47	46.77	484.06
Camellia sinensis	Colitis ischaemic	11	25.64	14.17	46.4	25.72	14.18	46.64
Linum usitatissimum	Sensory loss	5	6	2.5	14.43	6.01	2.5	14.47
Panax ginseng	Potentiating drug interaction	3	27.71	8.93	85.98	27.78	8.92	86.47
Cannabis sativa	Monoplegia	6	6.13	2.76	13.64	6.14	2.75	13.69
Cannabis sativa	Ventricular fibrillation	11	3.81	2.11	6.88	3.81	2.11	6.89
Senna alexandrina	Clostridium difficile colitis	71	8.08	6.41	10.18	8.2	6.48	10.37
Ginkgo biloba	Subdural haematoma	7	3.78	1.8	7.94	3.79	1.8	7.96
Hypericum perforatum	MOUTH ULCERATION	4	4.87	1.82	13.01	4.87	1.82	13.01
Cannabis sativa	FEAR	26	3.11	2.12	4.57	3.12	2.12	4.59
Serenoa repens	Intraocular pressure increased	7	4.42	2.11	9.28	4.42	2.1	9.29
Cannabis sativa	Exposure during breast feeding	7	5	2.38	10.49	5.01	2.38	10.53
Ginkgo biloba	Eyelid ptosis	6	5.15	2.31	11.47	5.15	2.31	11.48
Cannabis sativa	Eyelid disorder	3	6.29	2.03	19.48	6.3	2.03	19.58
Hypericum perforatum	Yellow skin	3	13.6	4.38	42.23	13.62	4.38	42.36
Senna alexandrina	Impaired gastric emptying	27	4.51	3.1	6.57	4.54	3.11	6.63
Ginkgo biloba	Diplopia	12	3.69	2.09	6.51	3.69	2.09	6.51
Cannabis sativa	Screaming	7	4.32	2.06	9.06	4.32	2.06	9.08
Silybum marianum	Mitochondrial toxicity	3	42.27	13.7	130.42	42.7	13.68	133.31
Allium salinum	POST PROCEDURAL HAEMORRHAGE	4	33.09	12.27	89.26	33.12	12.27	89.4
Allium sativum	POST PROCEDURAL HAEMORRHAGE	12	5.11	2.9	9	5.12	2.9	9.03
Ginkgo biloba	POST PROCEDURAL HAEMORRHAGE	8	4.84	2.42	9.69	4.85	2.42	9.72
Zingiber officinale	POST PROCEDURAL HAEMORRHAGE	9	13.73	7.12	26.47	13.75	7.13	26.53
Cannabis sativa	METABOLIC DISORDER	5	3.68	1.53	8.84	3.68	1.53	8.85
Cannabis sativa	Paranoia	30	6.93	4.84	9.92	6.95	4.85	9.96
Hypericum perforatum	Paranoia	13	14.29	8.26	24.72	14.31	8.27	24.77
Panax ginseng	Paranoia	3	3.35	1.08	10.41	3.35	1.08	10.41
Hedera helix	HYPOTHERMIA	3	208.6	63.01	690.64	208.75	63	691.66
Melaleuca alternifolia	Pneumonitis	3	53.17	16.62	170.12	53.19	16.62	170.25
Nicotiana tabacum	TENSION	4	59.5	22.07	160.39	59.58	22.07	160.81
Hypericum perforatum	TENSION	3	9.42	3.03	29.26	9.43	3.03	29.32
Ginkgo biloba	CEREBRAL ATROPHY	13	18.8	10.91	32.38	18.9	10.94	32.65
Panax ginseng	CEREBRAL ATROPHY	4	16.64	6.23	44.42	16.67	6.23	44.57
Zingiber officinale	CEREBRAL ATROPHY	4	14.46	5.42	38.59	14.49	5.42	38.73
Ginkgo biloba	DEVICE FAILURE	8	5.02	2.51	10.05	5.03	2.51	10.08
Vaccinium macrocarpon	SPONDYLOLISTHESIS	5	8.26	3.44	19.82	8.3	3.45	19.99
Vaccinium macrocarpon	ORTHOSTATIC HYPOTENSION	21	5.67	3.69	8.7	5.69	3.7	8.74
Ginkgo biloba	AMMONIA INCREASED	4	5.65	2.12	15.06	5.66	2.12	15.11
Hypericum perfoliatum	LABORATORY TEST ABNORMAL	5	38.2	15.63	93.37	38.22	15.63	93.47
Hypericum perforatum	LABORATORY TEST ABNORMAL	5	6.31	2.62	15.2	6.31	2.62	15.21
Camellia sinensis	Autoimmune hepatitis	3	9.2	2.96	28.55	9.21	2.96	28.63
Plantago notata	Drug reaction with eosinophilia and systemic symptoms	4	15.23	5.68	40.82	15.24	5.68	40.87
Plantago ovata	Drug reaction with eosinophilia and systemic symptoms	4	15.13	5.65	40.55	15.14	5.65	40.6
Panax ginseng	Drug reaction with eosinophilia and systemic symptoms	19	32.27	20.48	50.86	32.37	20.51	51.09
Passiflora incarnata	Drug reaction with eosinophilia and systemic symptoms	6	331.2	134.34	816.54	331.52	134.37	817.91
Ginkgo biloba	Feeling of despair	6	11.19	5.03	24.9	11.22	5.03	25.04
Cannabis sativa	Feeling of despair	9	9.94	5.18	19.09	9.98	5.18	19.23
Cannabis sativa	Somnambulism	11	6.54	3.62	11.81	6.55	3.62	11.85
Vaccinium macrocarpon	Snoring	10	12.1	6.52	22.46	12.17	6.53	22.68
Hypericum perforatum	TOXIC EPIDERMAL NECROLYSIS	6	9.03	4.05	20.16	9.04	4.05	20.19
Hypericum perforatum	AGRANULOCYTOSIS	3	4.59	1.48	14.26	4.59	1.48	14.27
Plantago notata	PERICARDIAL EFFUSION	3	7.37	2.36	22.97	7.38	2.37	23.01
Plantago ovata	PERICARDIAL EFFUSION	3	7.33	2.35	22.84	7.33	2.35	22.85
Ginkgo biloba	Metastases to bone	8	5.33	2.66	10.67	5.34	2.67	10.7
Curcuma longa	Splenomegaly	6	4.28	1.92	9.53	4.29	1.92	9.56
Senna alexandrina	Bronchiectasis	13	3.66	2.13	6.29	3.68	2.13	6.35
Ginkgo biloba	Cerebral haematoma	5	12.24	5.1	29.39	12.27	5.09	29.56
Vitis vinifera	Phlebitis	3	8.29	2.67	25.74	8.3	2.67	25.8
Vaccinium macrocarpon	Lumbar spinal stenosis	10	10.48	5.64	19.46	10.53	5.65	19.62
Ginkgo biloba	Cerebral ischaemia	10	11.31	6.08	21.03	11.34	6.09	21.13
Cannabis sativa	Occult blood positive	3	5.02	1.62	15.55	5.03	1.62	15.63
Ginkgo biloba	Prostatic specific antigen increased	7	5.11	2.43	10.73	5.12	2.44	10.76
Serenoa repens	Jaw disorder	3	3.18	1.03	9.86	3.18	1.02	9.87
Hypericum perforatum	Major depression	3	9.41	3.03	29.23	9.42	3.03	29.29
Ginkgo biloba	Bladder prolapse	3	14.31	4.62	44.3	14.36	4.62	44.66
Linum usitatissimum	Akinesia	3	15.82	5.11	49	15.87	5.1	49.36
Ginkgo biloba	Eschar	4	36.1	13.61	95.79	36.47	13.61	97.76
Hypericum perforatum	Personality change	6	11.96	5.36	26.69	11.97	5.36	26.74
Valeriana officinalis	Caesarean section	3	29.3	9.28	92.51	29.31	9.28	92.58
Cannabis sativa	Foetal growth restriction	6	6.58	2.96	14.64	6.6	2.96	14.72
Cannabis sativa	DRUG TOLERANCE	6	6.7	3.01	14.9	6.72	3.01	14.99
Silybum marianum	BIPOLAR DISORDER	8	5.47	2.73	10.95	5.48	2.74	10.98
Silybum marianum	DRUG LEVEL BELOW THERAPEUTIC	4	14.06	5.28	37.44	14.1	5.28	37.67
Cannabis sativa	BLOOD SODIUM INCREASED	4	6.3	2.37	16.77	6.32	2.37	16.87
Ginkgo biloba	ATRIOVENTRICULAR BLOCK COMPLETE	14	15.64	9.26	26.42	15.71	9.28	26.6
Ginkgo biloba	MYOCARDIAL ISCHAEMIA	9	4.01	2.08	7.71	4.02	2.09	7.74
Ginkgo biloba	FAECES PALE	3	10.34	3.34	32.03	10.37	3.34	32.23
Cannabis sativa	NYSTAGMUS	5	3.73	1.55	8.96	3.74	1.55	9
Senna alexandrina	TUBULOINTERSTITIAL NEPHRITIS	48	5.49	4.14	7.28	5.54	4.17	7.37
Ginkgo biloba	TUBULOINTERSTITIAL NEPHRITIS	4	3.21	1.2	8.56	3.22	1.21	8.59
Ginkgo biloba	RENAL INJURY	4	3.24	1.22	8.64	3.24	1.21	8.64
Ginkgo biloba	INTERNATIONAL NORMALISED RATIO DECREASED	7	8.05	3.84	16.89	8.06	3.83	16.94
Aloe vera	INTERNATIONAL NORMALISED RATIO DECREASED	3	14.73	4.74	45.8	14.75	4.74	45.92
Serenoa repens	INTERNATIONAL NORMALISED RATIO DECREASED	5	5.95	2.48	14.3	5.96	2.48	14.35
Cannabis sativa	OPISTHOTONUS	5	27	11.3	64.54	27.35	11.31	66.13
Cannabis sativa	SELF-INJURIOUS IDEATION	10	10.5	5.65	19.5	10.55	5.66	19.66
Ginkgo biloba	PRIAPISM	3	5.89	1.9	18.26	5.9	1.9	18.33
Camellia sinensis	HEPATITIS ACUTE	7	18.03	8.58	37.88	18.07	8.58	38.04
Hypericum perforatum	HEPATITIS ACUTE	3	10.19	3.28	31.65	10.2	3.28	31.72
Ginkgo biloba	GASTRIC ULCER HAEMORRHAGE	4	4.62	1.73	12.31	4.63	1.73	12.36
Senna alexandrina	CLOSTRIDIAL INFECTION	25	4.24	2.87	6.27	4.26	2.87	6.32
Vaccinium macrocarpon	PERICARDIAL HAEMORRHAGE	3	5.63	1.82	17.43	5.64	1.82	17.52
Scutellaria lateriflora	BLOOD MAGNESIUM INCREASED	4	78996.1	8849.93	705134	79854.7	8903.83	716184
Silybum marianum	BLOOD MAGNESIUM INCREASED	3	32.95	10.67	101.8	33.21	10.65	103.54
Senna alexandrina	NON-HODGKIN'S LYMPHOMA	22	4.54	2.99	6.88	4.57	3	6.96
Senna alexandrina	DIZZINESS POSTURAL	24	3.98	2.67	5.93	4	2.68	5.98
Valeriana officinalis	NEONATAL DISORDER	3	173.45	54.99	547.08	173.82	54.98	549.57
Nicotiana tabacum	NEONATAL DISORDER	3	99.73	31.87	312.13	99.95	31.86	313.58
Cannabis sativa	NEONATAL DISORDER	4	5.97	2.24	15.89	5.99	2.24	15.99
Scutellaria lateriflora	BLOOD PHOSPHORUS INCREASED	4	29237.8	3270.65	261370	29354.7	3277.98	262874
Cannabis sativa	HEAD BANGING	4	30	11.33	79.41	30.43	11.33	81.71
Senna alexandrina	BLADDER TRABECULATION	4	54.95	21.81	138.45	61.7	21.82	174.49
Cannabis sativa	POST-TRAUMATIC STRESS DISORDER	8	7.65	3.83	15.29	7.68	3.83	15.39
Cannabis sativa	OBSESSIVE THOUGHTS	4	8.22	3.09	21.87	8.25	3.09	22.04
Cannabis sativa	CONVERSION DISORDER	3	5.3	1.71	16.42	5.31	1.71	16.5
Senna alexandrina	CLUBBING	5	14.72	6.21	34.91	15.14	6.22	36.87
Senna alexandrina	MECHANICAL VENTILATION	12	5.74	3.27	10.08	5.79	3.28	10.23
Zingiber officinale	IRON DEFICIENCY	4	28.03	10.51	74.74	28.12	10.51	75.22
Panax ginseng	ACUTE CORONARY SYNDROME	3	6.48	2.09	20.13	6.48	2.08	20.15
Avena sativa	ACUTE CORONARY SYNDROME	3	110.16	34.19	354.96	110.23	34.19	355.43
Tribulus terrestris	ACUTE CORONARY SYNDROME	3	1184.25	265.12	5289.95	1185.02	265.14	5296.31
Avena sativa	ACUTE CORONARY SYNDROME	3	296.06	86.29	1015.73	296.25	86.29	1017.07
Ginkgo biloba	DRUG LEVEL DECREASED	3	4.06	1.31	12.59	4.06	1.31	12.61
Ruscus aculeatus	NEUTROPHILIA	4	1316.5	457.68	3786.89	1322.18	457.86	3818.13
Medicago sativa	VITAMIN B12 DEFICIENCY	4	133.32	49.42	359.68	133.66	49.42	361.5
Panax ginseng	VITAMIN B12 DEFICIENCY	5	32.46	13.49	78.11	32.56	13.49	78.57
Zingiber officinale	VITAMIN B12 DEFICIENCY	5	28.21	11.73	67.86	28.29	11.73	68.24
Ginkgo biloba	VITAMIN B12 DEFICIENCY	4	8.98	3.37	23.92	9	3.37	24.03
Cannabis sativa	TACHYPHRENIA	4	5.01	1.88	13.34	5.02	1.88	13.4
Ginkgo biloba	BLOOD BLISTER	4	9.99	3.75	26.61	10.01	3.75	26.73
Ginkgo biloba	LOSS OF PROPRIOCEPTION	3	64.88	21.13	199.21	66.09	21.07	207.29
Cannabis sativa	ANTIPSYCHOTIC DRUG LEVEL INCREASED	6	10.04	4.52	22.32	10.09	4.52	22.52
Senna alexandrina	SCHIZOAFFECTIVE DISORDER	9	7.14	3.73	13.66	7.22	3.74	13.95
Ginkgo biloba	EXTENSOR PLANTAR RESPONSE	4	22.99	8.65	61.11	23.14	8.65	61.91
Senna alexandrina	COMA SCALE ABNORMAL	33	16.25	11.61	22.74	16.77	11.85	23.73
Senna alexandrina	CLEFT LIP AND PALATE	16	10.66	6.56	17.31	10.87	6.62	17.84
Senna alexandrina	TERATOGENICITY	11	61.85	35.58	107.53	70.54	37.5	132.71
Ginkgo biloba	SLUGGISHNESS	4	3.34	1.25	8.9	3.34	1.25	8.91
Cannabis sativa	AKATHISIA	11	3.64	2.02	6.58	3.64	2.01	6.58
Cannabis sativa	SEXUALLY INAPPROPRIATE BEHAVIOUR	7	101.05	49.03	208.27	106.2	49.65	227.16
Cannabis sativa	PHYSICAL ASSAULT	6	9.3	4.18	20.68	9.34	4.19	20.84
Ginkgo biloba	DYSGRAPHIA	6	7.3	3.28	16.25	7.31	3.28	16.3
Ginkgo biloba	QUADRIPARESIS	4	24.06	9.05	63.95	24.23	9.05	64.84
Cannabis sativa	ACCIDENTAL DEATH	15	30.75	18.59	50.87	31.2	18.72	52.01
Serenoa repens	PROSTATITIS	11	27.63	15.31	49.86	27.83	15.35	50.45
Ginkgo biloba	Faeces soft	3	10.8	3.49	33.45	10.83	3.48	33.67
Cannabis sativa	Blood prolactin increased	5	4.72	1.97	11.34	4.73	1.97	11.38
Ginkgo biloba	Immune thrombocytopenic purpura	7	21.47	10.25	44.99	21.6	10.26	45.47
Cannabis sativa	Developmental delay	10	10.15	5.46	18.85	10.2	5.47	19
Viscum album	Convulsive threshold lowered	5	10465.5	3924.55	27908.3	10740.9	3947.5	29225.5
Cannabis sativa	Premature delivery	8	5.21	2.61	10.42	5.22	2.61	10.46
Cannabis sativa	Staring	5	7.89	3.29	18.94	7.92	3.29	19.07
Allium sativum	Bleeding time prolonged	5	19.06	7.95	45.67	19.2	7.96	46.32
Cannabis sativa	Emotional poverty	3	16.24	5.26	50.15	16.36	5.25	50.98
Senna alexandrina	Foetal alcohol syndrome	8	54.21	28.18	104.27	60.76	29.15	126.66
Hypericum perforatum	UNINTENDED PREGNANCY	3	5.43	1.75	16.87	5.44	1.75	16.91
Cannabis sativa	MYOGLOBIN BLOOD INCREASED	5	11.68	4.87	28.01	11.74	4.87	28.29
Cannabis sativa	Drug diversion	31	45.72	32.23	64.86	46.72	32.68	66.8
Cannabis sativa	Dreamy state	3	31.89	10.37	98.06	32.37	10.34	101.31
Ginkgo biloba	Acquired haemophilia	5	72.01	30.21	171.62	73.51	30.29	178.43
Cannabis sativa	POLYDACTYLY	5	18.32	7.65	43.87	18.48	7.66	44.6
Ginkgo biloba	Virologic failure	4	13.73	5.16	36.55	13.78	5.16	36.82
Cannabis sativa	GUN SHOT WOUND	17	26.12	16.27	41.94	26.44	16.37	42.71
Cannabis sativa	TOXICOLOGIC TEST ABNORMAL	5	29.31	12.27	70.02	29.71	12.28	71.87
Cannabis sativa	Drug screen negative	8	21.99	11.03	43.84	22.22	11.06	44.63
Cannabis sativa	THEFT	4	29.78	11.25	78.83	30.21	11.25	81.12
Cannabis sativa	GRANDIOSITY	4	37.67	14.26	99.53	38.35	14.26	103.17
Serenoa repens	CHOROIDAL DETACHMENT	4	74.44	28.2	196.53	75.98	28.2	204.73
Ginkgo biloba	COAGULATION FACTOR VIII LEVEL DECREASED	3	102.41	33.56	312.51	105.48	33.42	332.93
Cannabis sativa	BLOOD CANNABINOIDS INCREASED	3	363.89	130.24	1016.67	441.65	126.86	1537.51
Cannabis sativa	VICTIM OF SEXUAL ABUSE	5	46.89	19.7	111.6	47.96	19.75	116.47
Cannabis sativa	CLEFT PALATE	3	5.11	1.65	15.83	5.12	1.65	15.91

## Sheet: FAERS-SOC
HERB	SOC	COUNT	PRR	PRR_LCI	PRR_UCI	ROR	ROR_LCI	ROR_UCI
Eucalyptus globulus	Infections and infestations	8	5.13	2.1	12.55	5.13	2.1	12.55
Eucalyptus globulus	Respiratory, thoracic and mediastinal disorders	8	3.5	1.43	8.56	3.5	1.43	8.56
Solanum dulcamara	Cardiac disorders	6	32.44	3.91	269.46	32.44	3.91	269.46
Solanum dulcamara	General disorders and administration site conditions	6	9.08	1.09	75.42	9.08	1.09	75.42
Solanum dulcamara	Injury, poisoning and procedural complications	5	8.34	1.62	42.99	8.34	1.62	42.99
Solanum dulcamara	Psychiatric disorders	6	34.05	4.1	282.84	34.05	4.1	282.84
Solanum dulcamara	Respiratory, thoracic and mediastinal disorders	6	31.5	3.79	261.66	31.5	3.79	261.66
Solanum lycopersicum	Eye disorders	3	4.13	1.2	14.27	4.13	1.2	14.27
Solanum lycopersicum	Gastrointestinal disorders	10	5.07	2	12.85	5.07	2	12.85
Solanum lycopersicum	Respiratory, thoracic and mediastinal disorders	8	4.2	1.66	10.64	4.2	1.66	10.64
Geranium thunbergii	Immune system disorders	3	15.35	2.56	91.87	15.35	2.56	91.87
Senna alexandrina	Blood and lymphatic system disorders	2360	3.26	3.12	3.41	3.27	3.13	3.42
Arachis hypogaea	Gastrointestinal disorders	11	4.46	1.89	10.5	4.46	1.89	10.5
Arachis hypogaea	Skin and subcutaneous tissue disorders	8	3.34	1.38	8.06	3.34	1.38	8.06
Trifolium pratense	Gastrointestinal disorders	23	4.24	2.36	7.61	4.24	2.36	7.61
Melilotus officinalis	Vascular disorders	18	3.6	1.89	6.86	3.6	1.89	6.86
Glycyrrhiza glabra	Metabolism and nutrition disorders	349	3.15	2.79	3.55	3.15	2.79	3.55
Glycine max	Blood and lymphatic system disorders	110	4.01	3.26	4.93	4.01	3.26	4.93
Glycine max	Investigations	207	3.42	2.89	4.05	3.42	2.89	4.05
Glycine max	Metabolism and nutrition disorders	139	3.25	2.69	3.93	3.25	2.69	3.93
Chenopodium album	Gastrointestinal disorders	15	3.2	1.63	6.3	3.2	1.63	6.3
Chenopodium album	General disorders and administration site conditions	23	3.16	1.54	6.48	3.16	1.54	6.48
Chenopodium album	Immune system disorders	13	6.34	3.17	12.66	6.34	3.17	12.66
Chenopodium album	Respiratory, thoracic and mediastinal disorders	20	7.5	3.79	14.85	7.5	3.79	14.85
Chenopodium album	Skin and subcutaneous tissue disorders	19	6.88	3.5	13.54	6.88	3.5	13.54
Amaranthus hybridus	Immune system disorders	7	3.58	1.51	8.47	3.58	1.51	8.47
Amaranthus hybridus	Skin and subcutaneous tissue disorders	13	5.05	2.37	10.74	5.05	2.37	10.74
Amaranthus retroflexus	Eye disorders	4	5.9	1.94	17.92	5.9	1.94	17.92
Amaranthus retroflexus	Gastrointestinal disorders	11	6.37	2.47	16.43	6.37	2.47	16.43
Amaranthus retroflexus	Respiratory, thoracic and mediastinal disorders	13	13.65	4.87	38.29	13.65	4.87	38.29
Amaranthus retroflexus	Skin and subcutaneous tissue disorders	7	3.46	1.34	8.93	3.46	1.34	8.93
Salsola kali	Eye disorders	5	12.91	4.22	39.46	12.92	4.23	39.49
Salsola kali	Gastrointestinal disorders	7	4.73	1.59	14.07	4.73	1.59	14.07
Salsola kali	Immune system disorders	6	8.77	2.95	26.1	8.77	2.95	26.1
Salsola kali	Respiratory, thoracic and mediastinal disorders	9	11.81	3.64	38.35	11.81	3.64	38.35
Salsola kali	Skin and subcutaneous tissue disorders	9	12.23	3.77	39.71	12.23	3.77	39.71
Salsola kali	Vascular disorders	7	4.44	1.49	13.21	4.44	1.49	13.21
Salsola kali	Product issues	6	25.96	8.72	77.25	25.96	8.72	77.25
Juniperus virginiana	Eye disorders	4	4.35	1.48	12.79	4.35	1.48	12.79
Juniperus virginiana	Gastrointestinal disorders	12	4.42	1.95	10.02	4.42	1.95	10.02
Juniperus virginiana	Immune system disorders	6	3.61	1.42	9.16	3.61	1.42	9.16
Juniperus virginiana	Respiratory, thoracic and mediastinal disorders	11	4.81	2.12	10.9	4.81	2.12	10.9
Juniperus ashei	Cardiac disorders	10	3.86	1.71	8.69	3.86	1.71	8.69
Juniperus ashei	Eye disorders	4	4.13	1.41	12.08	4.13	1.41	12.08
Juniperus ashei	Immune system disorders	7	4.21	1.75	10.15	4.21	1.75	10.15
Juniperus ashei	Respiratory, thoracic and mediastinal disorders	14	7.35	3.26	16.55	7.35	3.26	16.55
Juniperus ashei	Skin and subcutaneous tissue disorders	9	3.26	1.43	7.45	3.26	1.43	7.45
Taxodium distichum	Cardiac disorders	18	4.87	2.58	9.21	4.87	2.58	9.21
Melissa officinalis	Immune system disorders	3	6.14	1.47	25.69	6.14	1.47	25.69
Mentha piperita	Injury, poisoning and procedural complications	3	10	1.04	96.14	10	1.04	96.14
Panax notoginseng	Blood and lymphatic system disorders	6	103.57	12.47	860.31	103.57	12.47	860.31
Phyllanthus emblica	Hepatobiliary disorders	3	97.28	10.12	935.24	97.28	10.12	935.25
Phyllanthus emblica	Investigations	3	18.68	1.94	179.59	18.68	1.94	179.59
Quercus rubra	Gastrointestinal disorders	5	4.05	1.17	13.99	4.05	1.17	13.99
Quercus rubra	Immune system disorders	5	10.24	2.96	35.37	10.24	2.96	35.37
Quercus rubra	Respiratory, thoracic and mediastinal disorders	6	7.87	2.22	27.89	7.87	2.22	27.89
Quercus rubra	Skin and subcutaneous tissue disorders	7	12.68	3.28	49.04	12.68	3.28	49.04
Quercus velutina	Immune system disorders	5	17.06	4.08	71.39	17.06	4.08	71.39
Rosmarinus officinalis	Injury, poisoning and procedural complications	7	3.33	1.17	9.49	3.33	1.17	9.49
Rosmarinus officinalis	Skin and subcutaneous tissue disorders	7	5.43	1.9	15.48	5.43	1.9	15.48
Salvia officinalis	Cardiac disorders	4	3.6	1.02	12.76	3.6	1.02	12.76
Salvia officinalis	Metabolism and nutrition disorders	3	4.46	1.15	17.25	4.46	1.15	17.25
Salvia officinalis	Vascular disorders	5	3.8	1.1	13.13	3.8	1.1	13.13
Scutellaria lateriflora	Investigations	4	24.91	2.78	222.88	24.91	2.78	222.88
Uncaria tomentosa	Gastrointestinal disorders	4	4.05	1.01	16.19	4.05	1.01	16.19
Uncaria tomentosa	Infections and infestations	3	4.62	1.1	19.33	4.62	1.1	19.33
Dioscorea villosa	Vascular disorders	8	5.07	1.76	14.61	5.07	1.76	14.61
Ruscus aculeatus	Blood and lymphatic system disorders	7	5.75	2.44	13.53	5.75	2.44	13.53
Ruscus aculeatus	Endocrine disorders	8	12.17	5.36	27.63	12.17	5.36	27.63
Ruscus aculeatus	Gastrointestinal disorders	15	4.68	2.23	9.84	4.68	2.23	9.84
Ruscus aculeatus	Metabolism and nutrition disorders	13	9.01	4.29	18.94	9.01	4.29	18.94
Aloe bargalensis	Immune system disorders	4	3.72	1.18	11.68	3.72	1.18	11.68
Convallaria majalis	Gastrointestinal disorders	28	3.55	2.14	5.9	3.55	2.14	5.9
Iris germanica	Eye disorders	3	6.89	1.87	25.45	6.89	1.87	25.45
Iris germanica	Gastrointestinal disorders	7	5.67	1.8	17.87	5.67	1.8	17.87
Iris germanica	Immune system disorders	4	5.12	1.54	17	5.12	1.54	17
Iris germanica	Respiratory, thoracic and mediastinal disorders	9	15.75	4.26	58.18	15.75	4.26	58.18
Ginkgo biloba	Ear and labyrinth disorders	108	4.13	3.4	5.01	4.14	3.41	5.02
Fraxinus americana	General disorders and administration site conditions	13	9.84	2.22	43.61	9.84	2.22	43.61
Fraxinus americana	Immune system disorders	4	3.72	1.18	11.68	3.72	1.18	11.68
Fraxinus americana	Skin and subcutaneous tissue disorders	8	6.21	2.25	17.13	6.21	2.25	17.13
Avena sativa	Immune system disorders	13	4.03	2.12	7.66	4.03	2.12	7.66
Avena sativa	Skin and subcutaneous tissue disorders	22	4.98	2.79	8.88	4.98	2.79	8.88
Avena sativa	Product issues	5	3.69	1.46	9.34	3.69	1.46	9.34
Cynodon dactylon	Immune system disorders	18	7.09	3.89	12.93	7.09	3.89	12.93
Cynodon dactylon	Respiratory, thoracic and mediastinal disorders	22	5.25	2.91	9.48	5.25	2.91	9.48
Cynodon dactylon	Skin and subcutaneous tissue disorders	26	7.85	4.3	14.32	7.85	4.3	14.32
Digitaria purpurea	Blood and lymphatic system disorders	5	6.64	2.37	18.63	6.64	2.37	18.63
Digitaria purpurea	Cardiac disorders	11	8.5	3.3	21.93	8.5	3.3	21.93
Digitaria purpurea	Endocrine disorders	4	8.69	2.86	26.4	8.69	2.86	26.4
Digitaria purpurea	Metabolism and nutrition disorders	6	5.2	1.95	13.86	5.2	1.95	13.86
Digitaria purpurea	Pregnancy, puerperium and perinatal conditions	5	19.75	7.04	55.4	19.75	7.04	55.4
Digitaria purpurea	Surgical and medical procedures	4	8.79	2.89	26.7	8.79	2.89	26.7
Digitaria purpurea	Vascular disorders	9	3.8	1.51	9.57	3.8	1.51	9.57
Lolium perenne	Immune system disorders	6	15.35	4.33	54.4	15.35	4.33	54.4
Lolium perenne	Respiratory, thoracic and mediastinal disorders	9	47.25	5.99	372.96	47.25	5.99	372.96
Lolium perenne	Skin and subcutaneous tissue disorders	7	12.68	3.28	49.04	12.68	3.28	49.04
Paspalum notatum	Eye disorders	5	3.97	1.52	10.34	3.97	1.52	10.34
Paspalum notatum	Immune system disorders	16	10.92	5.4	22.09	10.92	5.4	22.09
Paspalum notatum	Respiratory, thoracic and mediastinal disorders	16	5.6	2.77	11.33	5.6	2.77	11.33
Paspalum notatum	Skin and subcutaneous tissue disorders	23	15.62	6.99	34.92	15.62	6.99	34.92
Paspalum nudatum	Eye disorders	3	3.87	1.13	13.28	3.87	1.13	13.28
Paspalum nudatum	Immune system disorders	10	11.37	4.62	27.98	11.37	4.62	27.98
Paspalum nudatum	Respiratory, thoracic and mediastinal disorders	10	5.83	2.37	14.35	5.83	2.37	14.35
Paspalum nudatum	Skin and subcutaneous tissue disorders	13	11.77	4.47	30.97	11.78	4.48	30.99
Phleum pratense	Immune system disorders	35	13.27	8.03	21.92	13.27	8.03	21.92
Phleum pratense	Respiratory, thoracic and mediastinal disorders	27	4.05	2.45	6.69	4.05	2.45	6.69
Phleum pratense	Skin and subcutaneous tissue disorders	35	7.04	4.26	11.63	7.05	4.27	11.65
Sorghum halepense	Eye disorders	6	4.28	1.78	10.31	4.28	1.78	10.31
Sorghum halepense	Gastrointestinal disorders	16	3.41	1.75	6.63	3.41	1.75	6.63
Sorghum halepense	Immune system disorders	20	13.65	6.99	26.66	13.65	6.99	26.66
Sorghum halepense	Respiratory, thoracic and mediastinal disorders	22	8.88	4.47	17.63	8.88	4.47	17.63
Sorghum halepense	Skin and subcutaneous tissue disorders	25	13.59	6.53	28.3	13.59	6.53	28.3
Triticum aestivum	Gastrointestinal disorders	265	4.1	3.46	4.86	4.1	3.46	4.86
Triticum aestivum	Injury, poisoning and procedural complications	266	3.4	2.87	4.03	3.4	2.87	4.03
Eleutherococcus senticosus	Cardiac disorders	9	5.41	2.15	13.63	5.41	2.15	13.63
Eleutherococcus senticosus	Metabolism and nutrition disorders	5	4	1.43	11.22	4	1.43	11.22
Eleutherococcus senticosus	Psychiatric disorders	11	8.92	3.46	23.01	8.92	3.46	23.01
Eleutherococcus senticosus	Vascular disorders	8	3.04	1.2	7.7	3.04	1.2	7.7
Fagus grandifolia	Eye disorders	4	20.66	5.17	82.61	20.66	5.17	82.61
Fagus grandifolia	Gastrointestinal disorders	4	4.05	1.01	16.19	4.05	1.01	16.19
Fagus grandifolia	Respiratory, thoracic and mediastinal disorders	6	15.75	3.18	78.04	15.75	3.18	78.04
Hedera helix	Infections and infestations	12	5.77	2.73	12.2	5.77	2.73	12.2
Hedera helix	Investigations	10	3.46	1.6	7.5	3.46	1.6	7.5
Melaleuca alternifolia	General disorders and administration site conditions	40	3.78	2.12	6.75	3.78	2.12	6.75
Melaleuca viridiflora	Renal and urinary disorders	3	5.98	1.59	22.54	5.98	1.59	22.54
Lycopodium clavatum	Gastrointestinal disorders	4	16.21	1.81	145.03	16.21	1.81	145.04
Equisetum arvense	Immune system disorders	12	4.55	2.31	8.98	4.55	2.31	8.98
Equisetum arvense	Renal and urinary disorders	7	3.49	1.54	7.91	3.49	1.54	7.91
Peumus boldus	General disorders and administration site conditions	15	5.68	1.89	17.11	5.68	1.89	17.11
Peumus boldus	Investigations	11	8.56	3.44	21.28	8.56	3.44	21.28
Peumus boldus	Reproductive system and breast disorders	4	5.65	1.88	17.02	5.65	1.88	17.02
Persea americana	Metabolism and nutrition disorders	13	4.83	2.5	9.32	4.83	2.5	9.32
Myristica fragrans	Cardiac disorders	3	5.41	1.09	26.8	5.41	1.09	26.8
Myristica fragrans	Psychiatric disorders	3	5.68	1.15	28.14	5.68	1.15	28.14
Myristica fragrans	Respiratory, thoracic and mediastinal disorders	3	5.25	1.06	26.01	5.25	1.06	26.01
Aconitum napellus	Respiratory, thoracic and mediastinal disorders	4	4.2	1.13	15.64	4.2	1.13	15.64
Papaver somniferum	Metabolism and nutrition disorders	16	3.7	2.09	6.55	3.7	2.09	6.55
Chelidonium majus	Metabolism and nutrition disorders	9	3.34	1.58	7.08	3.34	1.58	7.08
Platanus occidentalis	Eye disorders	5	10.33	3.53	30.22	10.33	3.53	30.22
Platanus occidentalis	Gastrointestinal disorders	9	6.08	2.16	17.08	6.08	2.16	17.08
Platanus occidentalis	Immune system disorders	9	15.35	5.46	43.13	15.35	5.46	43.13
Platanus occidentalis	Respiratory, thoracic and mediastinal disorders	13	34.12	7.7	151.2	34.12	7.7	151.2
Platanus occidentalis	Skin and subcutaneous tissue disorders	12	21.74	6.13	77.04	21.74	6.13	77.04
Paeonia lactiflora	Investigations	4	12.45	2.28	67.97	12.45	2.28	67.97
Paeonia lactiflora	Metabolism and nutrition disorders	3	10.4	2.1	51.53	10.4	2.1	51.53
Liquidambar styraciflua	Eye disorders	3	15.5	3.47	69.26	15.5	3.47	69.26
Liquidambar styraciflua	Immune system disorders	3	7.68	1.72	34.32	7.68	1.72	34.32
Liquidambar styraciflua	Skin and subcutaneous tissue disorders	5	13.59	2.64	70.05	13.59	2.64	70.05
Rhodiola rosea	Psychiatric disorders	9	3.93	1.68	9.19	3.93	1.68	9.19
Rhodiola rosea	Skin and subcutaneous tissue disorders	9	3.76	1.61	8.8	3.76	1.61	8.8
Tribulus terrestris	Cardiac disorders	5	13.52	2.62	69.69	13.52	2.62	69.69
Tribulus terrestris	Vascular disorders	4	5.07	1.13	22.65	5.07	1.13	22.65
Salix nigra	Eye disorders	3	7.75	2.06	29.21	7.75	2.06	29.21
Salix nigra	General disorders and administration site conditions	8	4.04	1.07	15.23	4.04	1.07	15.23
Salix nigra	Immune system disorders	5	8.53	2.6	27.95	8.53	2.6	27.95
Salix nigra	Respiratory, thoracic and mediastinal disorders	6	6.3	1.92	20.64	6.3	1.92	20.64
Salix nigra	Skin and subcutaneous tissue disorders	7	9.51	2.78	32.49	9.51	2.78	32.49
Populus alba	Immune system disorders	9	4.85	2.19	10.72	4.85	2.19	10.72
Populus alba	Skin and subcutaneous tissue disorders	10	3.02	1.39	6.54	3.02	1.39	6.54
Populus deltoides	Eye disorders	3	4.13	1.2	14.27	4.13	1.2	14.27
Populus deltoides	Immune system disorders	5	3.94	1.4	11.05	3.94	1.4	11.05
Populus deltoides	Respiratory, thoracic and mediastinal disorders	7	3.34	1.29	8.62	3.34	1.29	8.62
Populus deltoides	Skin and subcutaneous tissue disorders	10	6.79	2.68	17.2	6.79	2.68	17.2
Passiflora incarnata	Gastrointestinal disorders	12	3.04	1.44	6.43	3.04	1.44	6.43
Passiflora incarnata	Hepatobiliary disorders	6	8.84	3.58	21.8	8.84	3.58	21.8
Passiflora incarnata	Immune system disorders	8	4.09	1.8	9.29	4.09	1.8	9.29
Passiflora incarnata	Renal and urinary disorders	5	3.47	1.32	9.13	3.47	1.32	9.13
Passiflora incarnata	Skin and subcutaneous tissue disorders	13	4.71	2.24	9.9	4.71	2.24	9.9
Hypericum perforatum	Nervous system disorders	382	3.04	2.64	3.51	3.04	2.64	3.51
Hypericum perforatum	Psychiatric disorders	322	4.21	3.64	4.86	4.21	3.64	4.86
Prunus americana	Vascular disorders	6	3.26	1.1	9.7	3.26	1.1	9.7
Pygeum africanum	Eye disorders	9	4.43	2.16	9.1	4.43	2.16	9.1
Crataegus laevigata	Gastrointestinal disorders	32	3.16	1.99	5.02	3.16	1.99	5.02
Ulmus americana	Eye disorders	3	4.77	1.36	16.74	4.77	1.36	16.74
Ulmus americana	General disorders and administration site conditions	14	10.59	2.41	46.6	10.59	2.41	46.6
Ulmus americana	Immune system disorders	4	3.41	1.1	10.57	3.41	1.1	10.57
Ulmus americana	Respiratory, thoracic and mediastinal disorders	7	4.08	1.52	10.96	4.08	1.52	10.96
Ulmus americana	Skin and subcutaneous tissue disorders	10	9.06	3.29	24.93	9.06	3.29	24.93
Humulus lupulus	Cardiac disorders	16	3.2	1.72	5.94	3.2	1.72	5.94
Humulus lupulus	Congenital, familial and genetic disorders	3	10.4	3.22	33.62	10.4	3.22	33.62
Humulus lupulus	Endocrine disorders	6	4.93	2.08	11.68	4.93	2.08	11.68
Humulus lupulus	Investigations	15	3.34	1.78	6.25	3.34	1.78	6.25
Humulus lupulus	Metabolism and nutrition disorders	13	4.51	2.35	8.65	4.51	2.35	8.65
Humulus lupulus	Pregnancy, puerperium and perinatal conditions	6	8.33	3.52	19.74	8.33	3.52	19.74
Humulus lupulus	Renal and urinary disorders	11	5.48	2.76	10.87	5.48	2.76	10.87
Cannabis sativa	Psychiatric disorders	1629	4.77	4.47	5.09	4.78	4.48	5.11
Cannabis sativa	Social circumstances	381	8.2	7.37	9.12	8.22	7.39	9.14
Morus alba	Cardiac disorders	8	3.93	1.58	9.77	3.93	1.58	9.77
Morus alba	Eye disorders	5	7.38	2.66	20.49	7.38	2.66	20.49
Morus alba	Immune system disorders	10	11.37	4.62	27.98	11.37	4.62	27.98
Morus alba	Respiratory, thoracic and mediastinal disorders	14	14.7	5.29	40.81	14.7	5.29	40.81
Morus alba	Skin and subcutaneous tissue disorders	12	9.32	3.67	23.67	9.32	3.67	23.67
Morus alba	Vascular disorders	11	5.23	2.1	13	5.23	2.1	13
Urtica dioica	Eye disorders	4	3.18	1.11	9.11	3.18	1.11	9.11
Urtica dioica	Nervous system disorders	16	3.4	1.66	6.97	3.4	1.66	6.97
Morella cerifera	Respiratory, thoracic and mediastinal disorders	3	7.87	1.31	47.1	7.87	1.31	47.1
Morella cerifera	Skin and subcutaneous tissue disorders	3	8.15	1.36	48.78	8.15	1.36	48.78
Juglans nigra	Eye disorders	3	5.17	1.46	18.32	5.17	1.46	18.32
Juglans nigra	Gastrointestinal disorders	7	3.55	1.29	9.79	3.55	1.29	9.79
Juglans nigra	Respiratory, thoracic and mediastinal disorders	8	6	2.18	16.55	6	2.18	16.55
Juglans regia	Gastrointestinal disorders	4	16.21	1.81	145.03	16.21	1.81	145.04
Juglans regia	Respiratory, thoracic and mediastinal disorders	4	21	2.35	187.89	21	2.35	187.89
Carya illinoiensis	Eye disorders	6	7.29	2.87	18.49	7.29	2.87	18.49
Carya illinoiensis	Immune system disorders	11	9.38	4.14	21.26	9.38	4.14	21.26
Carya illinoiensis	Respiratory, thoracic and mediastinal disorders	9	3.37	1.46	7.79	3.37	1.46	7.79
Carya illinoiensis	Skin and subcutaneous tissue disorders	13	7.06	3.1	16.1	7.07	3.1	16.12
Carya ovata	Gastrointestinal disorders	4	8.11	1.49	44.28	8.11	1.49	44.28
Carya ovata	Immune system disorders	4	20.47	3.75	111.76	20.47	3.75	111.76
Carya ovata	Respiratory, thoracic and mediastinal disorders	5	26.25	3.07	224.69	26.25	3.07	224.69
Carya ovata	Skin and subcutaneous tissue disorders	5	27.17	3.17	232.57	27.17	3.17	232.57
Pelargonium sidoides	Hepatobiliary disorders	11	118.9	33.17	426.2	118.91	33.17	426.24
Pelargonium sidoides	Injury, poisoning and procedural complications	10	8.34	2.62	26.59	8.34	2.62	26.59
Oenothera biennis	Blood and lymphatic system disorders	6	3.57	1.48	8.6	3.57	1.48	8.6
Oenothera biennis	Neoplasms benign, malignant and unspecified (incl cysts and polyps)	5	3.11	1.21	8.02	3.11	1.21	8.02
Oenothera biennis	Nervous system disorders	22	5.04	2.54	10	5.04	2.54	10
Punica granatum	Musculoskeletal and connective tissue disorders	37	3.28	2.2	4.89	3.28	2.2	4.89
Boswellia sacra	General disorders and administration site conditions	14	3.53	1.36	9.19	3.53	1.36	9.19
Acer negundo	Cardiac disorders	5	3	1.01	8.95	3	1.01	8.95
Acer negundo	General disorders and administration site conditions	10	3.78	1.19	12.05	3.78	1.19	12.05
Acer negundo	Immune system disorders	5	5.69	1.91	16.98	5.69	1.91	16.98
Acer negundo	Respiratory, thoracic and mediastinal disorders	9	9.45	3.17	28.2	9.45	3.17	28.2
Acer negundo	Skin and subcutaneous tissue disorders	10	13.59	4.26	43.33	13.59	4.26	43.33
Aesculus hippocastanum	Investigations	43	3.52	2.42	5.12	3.52	2.42	5.12
Aesculus hippocastanum	Musculoskeletal and connective tissue disorders	45	3.78	2.61	5.48	3.78	2.61	5.48
Theobroma cacao	Gastrointestinal disorders	40	3.6	2.35	5.51	3.6	2.35	5.51
Viscum album	Metabolism and nutrition disorders	6	3.67	1.45	9.31	3.67	1.45	9.31
Viscum album	Vascular disorders	12	4.15	1.83	9.41	4.15	1.83	9.41
Rheum palmatum	Blood and lymphatic system disorders	3	4.71	1.31	16.88	4.71	1.31	16.88
Rheum palmatum	Cardiac disorders	5	3	1.01	8.95	3	1.01	8.95
Rheum palmatum	Immune system disorders	6	7.68	2.66	22.13	7.68	2.66	22.13
Rheum palmatum	Investigations	6	4.67	1.62	13.46	4.67	1.62	13.46
Rheum palmatum	Skin and subcutaneous tissue disorders	7	5.43	1.9	15.48	5.43	1.9	15.48
Rheum palmatum	Vascular disorders	8	5.07	1.76	14.61	5.07	1.76	14.61
Rumex acetosella	Injury, poisoning and procedural complications	4	13.34	1.49	119.36	13.34	1.49	119.36
Camellia siangensis	Blood and lymphatic system disorders	8	3.37	1.58	7.19	3.37	1.58	7.19
Camellia siangensis	Ear and labyrinth disorders	3	5	1.56	16.08	5	1.56	16.08
Camellia siangensis	Hepatobiliary disorders	10	8.31	4.15	16.65	8.32	4.15	16.67
Catharanthus roseus	Hepatobiliary disorders	3	6.95	2	24.18	6.95	2	24.18
Rauvolfia serpentina	Cardiac disorders	3	8.11	1.36	48.54	8.11	1.36	48.54
Rauvolfia serpentina	Gastrointestinal disorders	3	6.08	1.02	36.39	6.08	1.02	36.39
Hoodia gordonii	Cardiac disorders	4	4.33	1.16	16.13	4.33	1.16	16.13
Hoodia gordonii	Psychiatric disorders	4	4.54	1.22	16.91	4.54	1.22	16.91
Digitalis purpurea	Blood and lymphatic system disorders	5	6.64	2.37	18.63	6.64	2.37	18.63
Digitalis purpurea	Cardiac disorders	11	8.5	3.3	21.93	8.5	3.3	21.93
Digitalis purpurea	Endocrine disorders	4	8.69	2.86	26.4	8.69	2.86	26.4
Digitalis purpurea	Metabolism and nutrition disorders	6	5.2	1.95	13.86	5.2	1.95	13.86
Digitalis purpurea	Pregnancy, puerperium and perinatal conditions	5	19.75	7.04	55.4	19.75	7.04	55.4
Digitalis purpurea	Surgical and medical procedures	4	8.79	2.89	26.7	8.79	2.89	26.7
Digitalis purpurea	Vascular disorders	9	3.8	1.51	9.57	3.8	1.51	9.57
Plantago afra	Cardiac disorders	16	4.33	2.24	8.36	4.33	2.24	8.36
Plantago afra	Gastrointestinal disorders	16	3.24	1.68	6.25	3.24	1.68	6.25
Plantago afra	Investigations	15	4.45	2.29	8.63	4.45	2.29	8.63
Plantago afra	Metabolism and nutrition disorders	9	3.47	1.63	7.38	3.47	1.63	7.38
Plantago afra	Vascular disorders	19	4.25	2.21	8.18	4.25	2.21	8.18
Plantago caffra	Cardiac disorders	16	5.41	2.71	10.82	5.41	2.71	10.82
Plantago caffra	Investigations	13	4.26	2.1	8.63	4.26	2.1	8.63
Plantago caffra	Metabolism and nutrition disorders	9	4.07	1.88	8.8	4.07	1.88	8.8
Plantago caffra	Vascular disorders	18	4.89	2.43	9.83	4.89	2.43	9.83
Plantago lanceolata	Immune system disorders	17	10.24	5.23	20.06	10.24	5.23	20.06
Plantago lanceolata	Respiratory, thoracic and mediastinal disorders	17	5.25	2.68	10.28	5.25	2.68	10.28
Plantago lanceolata	Skin and subcutaneous tissue disorders	19	6.88	3.5	13.54	6.88	3.5	13.54
Plantago major	Immune system disorders	6	3.84	1.5	9.81	3.84	1.5	9.81
Plantago major	Nervous system disorders	14	5.21	2.19	12.42	5.21	2.19	12.42
Nicotiana tabacum	Pregnancy, puerperium and perinatal conditions	59	29.13	21.17	40.09	29.14	21.17	40.11
Atropa belladonna	Hepatobiliary disorders	69	4.93	3.83	6.35	4.93	3.83	6.35
Withania somnifera	Psychiatric disorders	22	3.29	1.95	5.56	3.29	1.95	5.56
Ilex paraguariensis	Investigations	5	7.78	2.09	28.97	7.78	2.09	28.97
Centella asiatica	Immune system disorders	12	3.15	1.65	6.02	3.15	1.65	6.02
Centella asiatica	Respiratory, thoracic and mediastinal disorders	19	3.12	1.77	5.5	3.12	1.77	5.5
Conium maculatum	Injury, poisoning and procedural complications	3	10	1.04	96.14	10	1.04	96.14
Sambucus nigra	Gastrointestinal disorders	37	3.41	2.2	5.28	3.41	2.2	5.28
Valeriana officinalis	Hepatobiliary disorders	9	3.39	1.71	6.74	3.39	1.71	6.74
Valeriana officinalis	Psychiatric disorders	35	3.31	2.18	5.02	3.31	2.18	5.02
Atractylodes lancea	Gastrointestinal disorders	8	4.05	1.52	10.79	4.05	1.52	10.79
Cynara scolymus	Cardiac disorders	4	5.41	1.35	21.63	5.41	1.35	21.63
Cynara scolymus	Vascular disorders	5	6.34	1.52	26.53	6.34	1.52	26.53
Silybum marianum	Hepatobiliary disorders	173	3.45	2.95	4.04	3.45	2.95	4.04
Carthamus tinctorius	Cardiac disorders	12	3.6	1.73	7.47	3.6	1.73	7.47
Carthamus tinctorius	Respiratory, thoracic and mediastinal disorders	11	3.04	1.45	6.39	3.04	1.45	6.39
Cichorium intybus	Investigations	5	31.14	3.64	266.55	31.14	3.64	266.55
Taraxacum officinale	Investigations	49	4.42	3.06	6.37	4.42	3.06	6.37
Artemisia tridentata	General disorders and administration site conditions	9	6.81	1.47	31.52	6.81	1.47	31.52
Artemisia tridentata	Immune system disorders	3	3.84	1.02	14.47	3.84	1.02	14.47
Artemisia tridentata	Injury, poisoning and procedural complications	6	4	1.22	13.11	4	1.22	13.11
Artemisia tridentata	Skin and subcutaneous tissue disorders	7	9.51	2.78	32.49	9.51	2.78	32.49
Achillea millefolium	Cardiac disorders	24	3.33	2	5.54	3.33	2	5.54
Achillea millefolium	Immune system disorders	15	3.2	1.79	5.71	3.2	1.79	5.71
Tanacetum cinerariifolium	Skin and subcutaneous tissue disorders	4	7.25	1.62	32.39	7.25	1.62	32.39
Ambrosia artemisiifolia	Ear and labyrinth disorders	3	4.04	1.27	12.9	4.04	1.27	12.9
Ambrosia artemisiifolia	Immune system disorders	28	8.96	5.4	14.88	8.96	5.4	14.88
Ambrosia artemisiifolia	Respiratory, thoracic and mediastinal disorders	28	4.59	2.76	7.62	4.59	2.76	7.62
Ambrosia artemisiifolia	Skin and subcutaneous tissue disorders	36	8.15	4.86	13.66	8.15	4.86	13.66
Iva annua	Skin and subcutaneous tissue disorders	3	16.3	1.7	156.71	16.3	1.7	156.71
Xanthium strumarium	Skin and subcutaneous tissue disorders	4	21.74	2.43	194.51	21.74	2.43	194.51
Helianthus annuus	Immune system disorders	5	8.53	2.6	27.95	8.53	2.6	27.95
Helianthus annuus	Skin and subcutaneous tissue disorders	6	6.52	1.99	21.36	6.52	1.99	21.36
Echinacea angustifolia	Hepatobiliary disorders	3	4.23	1.27	14.09	4.23	1.27	14.09
Echinacea angustifolia	Investigations	11	4.57	2.1	9.95	4.57	2.1	9.95
Echinacea purpurea	Hepatobiliary disorders	5	3	1.2	7.5	3	1.2	7.5
Echinacea purpurea	Musculoskeletal and connective tissue disorders	21	3.43	2.01	5.84	3.43	2.01	5.84
Echinacea purpurea	Reproductive system and breast disorders	10	4.32	2.19	8.53	4.32	2.19	8.53
Arnica montana	Investigations	20	3.37	1.96	5.81	3.37	1.96	5.81
Arnica montana	Surgical and medical procedures	6	3.62	1.55	8.44	3.62	1.55	8.44
Vaccinium macrocarpon	Renal and urinary disorders	666	3.31	3.05	3.6	3.32	3.05	3.61
Rhamnus purshiana	Investigations	8	4.53	1.82	11.26	4.53	1.82	11.26
Rhamnus purshiana	Renal and urinary disorders	4	4.25	1.41	12.81	4.25	1.41	12.81
Piper methysticum	General disorders and administration site conditions	39	4.54	2.42	8.5	4.54	2.42	8.5
Piper methysticum	Psychiatric disorders	23	4.5	2.6	7.78	4.5	2.6	7.78
Prunus africana	Vascular disorders	6	3.26	1.1	9.7	3.26	1.1	9.7
Acacia senegal	Nervous system disorders	5	14.89	1.74	127.45	14.89	1.74	127.45
Acacia senegal	Psychiatric disorders	4	11.35	2.08	61.97	11.35	2.08	61.97
Kochia scoparia	Immune system disorders	3	15.35	2.56	91.87	15.35	2.56	91.87
Kochia scoparia	Respiratory, thoracic and mediastinal disorders	4	21	2.35	187.89	21	2.35	187.89
Kochia scoparia	Skin and subcutaneous tissue disorders	3	8.15	1.36	48.78	8.15	1.36	48.78
Chlorella vulgaris	Eye disorders	6	4.77	1.96	11.59	4.77	1.96	11.59
Carya illinoinensis	Eye disorders	6	7.29	2.87	18.49	7.29	2.87	18.49
Carya illinoinensis	Immune system disorders	11	9.38	4.14	21.26	9.38	4.14	21.26
Carya illinoinensis	Respiratory, thoracic and mediastinal disorders	9	3.37	1.46	7.79	3.37	1.46	7.79
Carya illinoinensis	Skin and subcutaneous tissue disorders	13	7.06	3.1	16.1	7.07	3.1	16.12
Avena sativa	Immune system disorders	9	9.21	3.74	22.67	9.21	3.74	22.67
Avena sativa	Skin and subcutaneous tissue disorders	12	9.32	3.67	23.67	9.32	3.67	23.67
Avena sativa	Product issues	4	8.08	2.68	24.35	8.08	2.68	24.35
Triticum aestivum	Gastrointestinal disorders	5	3.38	1.03	11.08	3.38	1.03	11.08
Triticum aestivum	Immune system disorders	4	5.85	1.71	19.98	5.85	1.71	19.98
Triticum aestivum	Respiratory, thoracic and mediastinal disorders	5	4.37	1.33	14.32	4.37	1.33	14.32

## Sheet: CVAR-PT
HERB	PREF_TERM	COUNT	PRR	PRR_LCI	PRR_UCI	ROR	ROR_LCI	ROR_UCI
Ricinus communis	Rash	8	3.12	1.47	6.6	3.12	1.47	6.6
Cinnamomum camphora	Rash	4	3.18	1.1	9.19	3.19	1.1	9.22
Atropa belladonna	Rash	36	3.42	2.4	4.88	3.42	2.4	4.88
Avena sativa	Rash	77	7.31	5.61	9.52	7.32	5.62	9.54
Avena sativa	Rash	77	7.42	5.7	9.67	7.44	5.71	9.7
Hamamelis virginiana	Rash	6	4.07	1.68	9.86	4.07	1.68	9.86
Triticum aestivum	Rash	12	3.43	1.85	6.35	3.43	1.85	6.36
Triticum aestivum	Rash	12	3.54	1.91	6.57	3.55	1.91	6.59
Styrax paralleloneurum	Rash	7	7.12	2.97	17.05	7.12	2.97	17.05
Drimia maritima	Rash	6	15.7	5.28	46.71	15.7	5.28	46.72
Lavandula angustifolia	Rash	4	4.31	1.45	12.81	4.31	1.45	12.81
Commiphora wightii	Rash	6	4.23	1.74	10.28	4.23	1.74	10.28
Citrus sinensis	Rash	8	3.26	1.54	6.91	3.26	1.54	6.92
Solanum dulcamara	Rash	37	3.46	2.44	4.92	3.46	2.43	4.92
Juniperus sabina	Rash	4	5.23	1.72	15.89	5.23	1.72	15.89
Glycine soja	Chills	10	6.33	3.33	12.04	6.34	3.33	12.07
Carthamus tinctorius	Chills	3	4.18	1.31	13.33	4.19	1.31	13.37
Matricaria chamomilla	Chills	5	5.56	2.25	13.75	5.56	2.25	13.76
Oenothera biennis	Chills	6	4.66	2.05	10.6	4.66	2.05	10.61
Salvia officinalis	Chills	3	10.73	3.22	35.73	10.74	3.22	35.78
Passiflora incarnata	Chills	4	3.78	1.39	10.3	3.79	1.39	10.33
Angelica archangelica	Chills	3	13.71	4.04	46.53	13.72	4.04	46.59
Equisetum arvense	Chills	3	6.33	1.96	20.48	6.33	1.96	20.49
Carthamus tinctorius	Pyrexia	7	3.32	1.51	7.29	3.32	1.51	7.29
Brassica oleracea	Pyrexia	6	3.26	1.4	7.62	3.26	1.4	7.62
Spinacia oleracea	Pyrexia	5	5.67	2.16	14.91	5.67	2.16	14.92
Dioscorea villosa	Pyrexia	4	3.6	1.27	10.24	3.6	1.27	10.24
Aristotelia chilensis	Pyrexia	3	6.02	1.72	21.12	6.02	1.72	21.13
Cynara cardunculus	Diarrhoea	7	3.54	1.61	7.77	3.54	1.61	7.77
Achillea millefolium	Diarrhoea	5	4.8	1.86	12.4	4.8	1.86	12.4
Bryonia alba	Diarrhoea	3	3.48	1.05	11.56	3.48	1.05	11.56
Citrullus lanatus	Diarrhoea	3	10.44	2.77	39.35	10.44	2.77	39.36
Aloe succotrina	Diarrhoea	11	3.56	1.9	6.67	3.56	1.9	6.67
Petroselinum crispum	Diarrhoea	6	3.63	1.55	8.5	3.63	1.55	8.5
Glycyrrhiza uralensis	Diarrhoea	4	6.55	2.2	19.46	6.55	2.2	19.47
Arctium lappa	Diarrhoea	10	3.35	1.74	6.46	3.35	1.74	6.46
Schizonepeta tenuifolia	Diarrhoea	3	6.96	1.96	24.66	6.96	1.96	24.67
Arabis vochinensis	Diarrhoea	5	3.57	1.41	9.06	3.57	1.41	9.06
Brassica oleracea	Diarrhoea	13	8.82	4.73	16.46	8.83	4.73	16.48
Medicago sativa	Diarrhoea	17	5.03	3	8.43	5.04	3.01	8.45
Aralia chinensis	Diarrhoea	5	3.57	1.41	9.06	3.57	1.41	9.06
Salvia officinalis	Diarrhoea	3	3.63	1.09	12.09	3.63	1.09	12.09
Zea mays	Diarrhoea	6	3.27	1.4	7.62	3.27	1.4	7.62
Fumaria officinalis	Diarrhoea	3	83.49	8.68	802.63	83.5	8.68	802.8
Arctostaphylos uva-ursi	Diarrhoea	6	3.88	1.65	9.11	3.88	1.65	9.12
Centella asiatica	Diarrhoea	3	3.8	1.14	12.7	3.8	1.14	12.7
Angelica sinensis	Diarrhoea	4	3.09	1.1	8.68	3.09	1.1	8.68
Acacia chiapensis	Diarrhoea	5	3.57	1.41	9.06	3.57	1.41	9.06
Astragalus membranaceus	Diarrhoea	8	3.48	1.67	7.26	3.48	1.67	7.26
Linum usitatissimum	Diarrhoea	23	3.15	2.05	4.85	3.16	2.05	4.86
Bacopa monnieri	Diarrhoea	6	3.8	1.62	8.92	3.8	1.62	8.92
Withania somnifera	Diarrhoea	15	4.22	2.45	7.26	4.22	2.45	7.27
Equisetum hyemale	Diarrhoea	4	4.64	1.61	13.37	4.64	1.61	13.37
Berberis vulgaris	Diarrhoea	3	3.98	1.19	13.34	3.98	1.19	13.34
Gentiana lutea	Diarrhoea	3	6.96	1.96	24.66	6.96	1.96	24.67
Sambucus nigra	Diarrhoea	3	3.48	1.05	11.56	3.48	1.05	11.56
Lepidium meyenii	Diarrhoea	20	6.55	4.03	10.66	6.55	4.02	10.66
Piper nigrum	Diarrhoea	7	4.24	1.91	9.39	4.24	1.91	9.39
Theobroma cacao	Diarrhoea	8	3.98	1.9	8.35	3.98	1.9	8.35
Trifolium pratense	Diarrhoea	5	3.03	1.2	7.62	3.03	1.2	7.63
Lavandula angustifolia	Diarrhoea	5	8.7	3.19	23.75	8.7	3.19	23.75
Aralia elata	Diarrhoea	5	3.57	1.41	9.06	3.57	1.41	9.06
Chlorella vulgaris	Diarrhoea	14	12.99	6.89	24.49	13	6.89	24.52
Chlorella pyrenoidosa	Diarrhoea	14	12.99	6.89	24.49	13	6.89	24.52
Chlorella sp	Diarrhoea	14	12.99	6.89	24.49	13	6.89	24.52
Punica granatum	Diarrhoea	11	5.37	2.82	10.24	5.37	2.82	10.24
Lycium chinense	Diarrhoea	13	5.93	3.26	10.79	5.93	3.26	10.79
Ziziphus jujuba	Diarrhoea	3	4.64	1.37	15.75	4.64	1.37	15.75
Spinacia oleracea	Diarrhoea	10	15.46	7.14	33.49	15.47	7.14	33.52
Salvia hispanica	Diarrhoea	7	9.74	4.12	23.03	9.74	4.12	23.04
Euterpe oleracea	Diarrhoea	11	12.76	6.25	26.04	12.76	6.25	26.05
Garcinia mangostana	Diarrhoea	9	13.92	6.25	30.98	13.92	6.25	30.99
Lycium barbarum	Diarrhoea	12	6.42	3.43	12.02	6.43	3.43	12.05
Oryza sativa	Diarrhoea	16	7.42	4.28	12.88	7.43	4.28	12.9
Malpighia glabra	Diarrhoea	4	4.12	1.44	11.77	4.12	1.44	11.78
Palmaria palmata	Diarrhoea	3	3.98	1.19	13.34	3.98	1.19	13.34
Aristotelia chilensis	Diarrhoea	3	6.42	1.83	22.53	6.42	1.83	22.53
Phyllanthus emblica	Diarrhoea	5	3.09	1.23	7.78	3.09	1.23	7.79
Cinnamomum cassia	Diarrhoea	4	4.12	1.44	11.77	4.12	1.44	11.78
Rhododendron luteum	Diarrhoea	3	4.91	1.44	16.75	4.91	1.44	16.76
Rhododendron aureum	Diarrhoea	3	4.91	1.44	16.75	4.91	1.44	16.76
Cinnamomum aromaticum	Diarrhoea	4	4.12	1.44	11.77	4.12	1.44	11.78
Rheum palmatum	Diarrhoea	4	4.64	1.61	13.37	4.64	1.61	13.37
Terminalia bellirica	Diarrhoea	5	3.03	1.2	7.62	3.03	1.2	7.63
Astragalus propinquus	Diarrhoea	8	3.48	1.67	7.26	3.48	1.67	7.26
Plantago afra	Diarrhoea	3	9.28	2.51	34.28	9.28	2.51	34.28
Rhamnus purshiana	Pruritus	48	4.07	2.98	5.55	4.08	2.99	5.57
Avena sativa	Pruritus	96	10.72	8.36	13.75	10.75	8.38	13.8
Avena sp	Pruritus	93	14.34	10.97	18.74	14.39	11	18.82
Avena sativa	Pruritus	96	10.91	8.5	14	10.94	8.52	14.05
Styrax paralleloneurum	Pruritus	4	3.7	1.27	10.78	3.7	1.27	10.78
Ambrosia artemisiifolia	Pruritus	8	5.18	2.37	11.3	5.18	2.37	11.3
Berberis vulgaris	Pruritus	4	3.89	1.33	11.38	3.89	1.33	11.38
Citrus grandis	Pruritus	35	6.07	4.15	8.87	6.08	4.16	8.89
Citrus aurantium	Pruritus	41	3.54	2.54	4.94	3.54	2.54	4.94
Juniperus oxycedrus	Pruritus	4	7.77	2.44	24.77	7.77	2.44	24.78
Frangula purshiana	Pruritus	48	4.07	2.98	5.55	4.08	2.99	5.57
Commiphora wightii	Pruritus	6	4.48	1.84	10.88	4.48	1.84	10.89
Raphanus sativus	Pruritus	3	3.89	1.13	13.44	3.89	1.13	13.44
Rheum palmatum	Pruritus	6	5.3	2.15	13.07	5.3	2.15	13.07
Dactylis glomerata	Pruritus	4	5.55	1.83	16.86	5.55	1.83	16.86
Poa pratensis	Pruritus	3	4.86	1.37	17.22	4.86	1.37	17.22
Carex fructus	Pruritus	4	11.1	3.25	37.92	11.1	3.25	37.92
Carum carvi	Pruritus	4	9.71	2.92	32.24	9.71	2.92	32.25
Citrus sinensis	Pruritus	31	27.37	15.85	47.26	27.4	15.86	47.33
Lycopodium clavatum	Pruritus	3	5.3	1.48	19	5.3	1.48	19
Chelidonium majus	Pruritus	3	4.86	1.37	17.22	4.86	1.37	17.22
Citrus reticulata	Pruritus	34	6.17	4.2	9.07	6.18	4.2	9.09
Citrus nobilis	Pruritus	34	6.41	4.35	9.44	6.42	4.36	9.46
Lomatium dissectum	Pruritus	3	19.43	3.92	96.26	19.43	3.92	96.27
Bacopa monnieri	Pruritus	7	3.16	1.42	7.02	3.16	1.42	7.03
Citrus limon	Pruritus	39	4.12	2.92	5.82	4.12	2.92	5.82
Citrus aurantiifolia	Pruritus	34	6.12	4.16	9	6.12	4.16	9
Rhamnus purshiana	Rash maculo-papular	16	5.3	3.2	8.77	5.31	3.2	8.8
Plantago asiatica	Rash maculo-papular	79	3.93	3.14	4.92	3.97	3.16	4.98
Atropa belladonna	Rash maculo-papular	11	4.36	2.38	7.99	4.37	2.38	8.01
Ricinus communis	Rash maculo-papular	5	8.64	3.45	21.66	8.65	3.45	21.7
Citrus aurantium	Rash maculo-papular	21	7.41	4.75	11.56	7.43	4.75	11.61
Citrus sinensis	Rash maculo-papular	21	56.73	32.73	98.31	56.92	32.81	98.76
Strychnos toxifera	Rash erythematous	4	7.7	2.75	21.6	7.71	2.75	21.64
Plantago asiatica	Rash erythematous	91	3.76	3.05	4.64	3.79	3.07	4.69
Rhamnus purshiana	Rash erythematous	21	5.84	3.74	9.11	5.86	3.75	9.15
Atropa belladonna	Rash erythematous	13	4.29	2.45	7.5	4.29	2.45	7.51
Avena sativa	Rash erythematous	33	9.92	6.9	14.27	9.96	6.91	14.35
Avena sp	Rash erythematous	32	12.19	8.38	17.72	12.24	8.41	17.82
Avena sativa	Rash erythematous	33	10.05	6.99	14.46	10.09	7	14.54
Styrax paralleloneurum	Rash erythematous	3	9.71	2.91	32.43	9.72	2.91	32.48
Citrus sinensis	Rash erythematous	3	4.27	1.33	13.69	4.28	1.33	13.73
Ambrosia artemisiifolia	Oedema	4	12.18	4.32	34.31	12.19	4.32	34.36
Attalea racemosa	Oedema	3	4.14	1.31	13.12	4.14	1.31	13.13
Actaea cimicifuga	Oedema	3	4.14	1.31	13.12	4.14	1.31	13.13
Actaea racemosa	Oedema	3	4.14	1.31	13.12	4.14	1.31	13.13
Ginkgo biloba	Dyspepsia	5	3.04	1.25	7.37	3.05	1.26	7.4
Curcuma longa	Dyspepsia	4	3.6	1.33	9.71	3.61	1.34	9.75
Serenoa repens	Dyspepsia	5	7.06	2.88	17.34	7.07	2.88	17.38
Vaccinium macrocarpon	Dyspepsia	5	3.1	1.28	7.52	3.1	1.28	7.53
Plantago notata	Dyspepsia	3	4.72	1.49	14.91	4.72	1.49	14.93
Plantago ovata	Dyspepsia	3	4.72	1.49	14.91	4.72	1.49	14.93
Olea europaea	Dyspepsia	3	6.73	2.11	21.44	6.74	2.11	21.49
Cannabis sativa	Amnesia	11	3.04	1.68	5.5	3.05	1.68	5.53
Valeriana officinalis	Amnesia	5	15.22	6.19	37.43	15.25	6.19	37.58
Borago officinalis	Amnesia	3	3.4	1.09	10.61	3.4	1.09	10.63
Linum usitatissimum	Amnesia	4	4.88	1.82	13.1	4.89	1.82	13.16
Equisetum arvense	Amnesia	3	20.83	6.44	67.35	20.86	6.44	67.56
Strychnos toxifera	Urticaria	6	4.2	1.77	9.98	4.2	1.77	9.99
Avena sp	Urticaria	28	3.59	2.42	5.34	3.59	2.41	5.34
Lomatium dissectum	Urticaria	5	122.48	14.31	1048.35	122.51	14.31	1048.7
Yucca schidigera	Urticaria	7	4.51	2.01	10.1	4.51	2.01	10.1
Arctium lappa	Urticaria	12	3.63	1.98	6.65	3.63	1.98	6.66
Foeniculum vulgare	Urticaria	12	3.54	1.93	6.48	3.54	1.93	6.49
Dactylis glomerata	Urticaria	5	9.42	3.36	26.42	9.42	3.36	26.43
Poa pratensis	Urticaria	4	8.91	2.84	27.98	8.91	2.84	27.98
Citrus aurantium	Urticaria	33	3.47	2.41	5	3.47	2.41	5
Citrus sinensis	Urticaria	29	29.6	17.24	50.83	29.64	17.25	50.92
Juniperus sabina	Urticaria	3	4.9	1.42	16.92	4.9	1.42	16.93
Lycopodium clavatum	Urticaria	3	6.68	1.86	23.94	6.68	1.86	23.95
Jateorhiza palmata	Urticaria	3	36.74	6.14	219.87	36.75	6.14	219.95
Achillea millefolium	Urticaria	5	4.22	1.63	10.9	4.22	1.63	10.9
Rhodiola rosea	Urticaria	13	4.25	2.36	7.66	4.25	2.36	7.66
Ligusticum porteri	Urticaria	3	73.49	7.64	706.5	73.5	7.64	706.65
Citrus limon	Urticaria	36	4.72	3.3	6.74	4.72	3.3	6.74
Bacopa monnieri	Urticaria	8	4.67	2.19	9.95	4.67	2.19	9.95
Angelica archangelica	Urticaria	4	5.76	1.94	17.12	5.76	1.94	17.12
Sedum griseum	Urticaria	12	4.14	2.25	7.63	4.14	2.25	7.63
Rumex crispus	Urticaria	11	9.98	4.95	20.12	9.98	4.95	20.12
Rumex crassus	Urticaria	11	9.98	4.95	20.12	9.98	4.95	20.12
Phyllanthus emblica	Urticaria	8	4.67	2.19	9.95	4.67	2.19	9.95
Terminalia chebula	Urticaria	8	4.78	2.24	10.19	4.78	2.24	10.2
Terminalia bellirica	Urticaria	8	4.56	2.14	9.7	4.56	2.14	9.7
Cinnamomum verum	Urticaria	10	3.36	1.74	6.51	3.36	1.73	6.51
Tribulus terrestris	Urticaria	7	3.43	1.56	7.56	3.43	1.55	7.57
Lycium barbarum	Urticaria	7	3.01	1.37	6.6	3.01	1.37	6.6
Mucuna pruriens	Urticaria	6	5.07	2.11	12.21	5.07	2.1	12.21
Hyssopus officinalis	Urticaria	5	4.54	1.75	11.79	4.54	1.75	11.79
Vaccinium corymbosum	Urticaria	7	7.46	3.2	17.38	7.46	3.2	17.39
Olea europaea	Urticaria	7	3.01	1.37	6.6	3.01	1.37	6.6
Helianthus annuus	Urticaria	4	5.44	1.84	16.07	5.44	1.84	16.08
Phleum pratense	Urticaria	4	4.26	1.47	12.32	4.26	1.47	12.32
Magnolia officinalis	Urticaria	3	6.68	1.86	23.94	6.68	1.86	23.95
Rhododendron luteum	Urticaria	5	8.17	2.97	22.48	8.17	2.97	22.48
Rhododendron aureum	Urticaria	5	8.17	2.97	22.48	8.17	2.97	22.48
Cinnamomum cassia	Urticaria	6	5.88	2.41	14.33	5.88	2.41	14.33
Cinnamomum aromaticum	Urticaria	6	5.88	2.41	14.33	5.88	2.41	14.33
Robinia pseudoacacia	Urticaria	5	4.9	1.88	12.8	4.9	1.88	12.8
Ambrosia artemisiifolia	Angioedema	3	21.22	6.53	68.94	21.25	6.53	69.15
Plantago asiatica	Face oedema	33	3.16	2.24	4.45	3.19	2.26	4.51
Atropa belladonna	Face oedema	6	4.6	2.05	10.34	4.6	2.04	10.36
Eucalyptus globulus	Face oedema	3	4.13	1.31	12.97	4.14	1.32	13.02
Hydrastis canadensis	Face oedema	3	16.02	4.91	52.29	16.03	4.91	52.38
Harpagophytum procumbens	Arthralgia	4	3.79	1.37	10.52	3.79	1.37	10.52
Boswellia serrata	Arthralgia	4	4.04	1.45	11.24	4.05	1.45	11.27
Equisetum arvense	Arthralgia	3	3.42	1.06	11.07	3.42	1.06	11.07
Bacopa monnieri	Arthralgia	4	3.87	1.39	10.75	3.87	1.39	10.75
Hypericum perfoliatum	Irritability	6	6.94	3.07	15.71	6.95	3.07	15.76
Hypericum perforatum	Irritability	6	6.94	3.07	15.71	6.95	3.07	15.76
Carthamus tinctorius	Somnolence	3	3.44	1.08	10.97	3.44	1.08	10.98
Passiflora incarnata	Somnolence	7	5.64	2.61	12.19	5.65	2.61	12.22
Humulus lupulus	Somnolence	6	13.11	5.47	31.41	13.11	5.47	31.43
Matricaria chamomilla	Somnolence	4	3.61	1.32	9.87	3.61	1.32	9.87
Valeriana officinalis	Somnolence	9	7.17	3.61	14.25	7.18	3.61	14.28
Garcinia gummi-gutta	Somnolence	4	3.22	1.18	8.78	3.23	1.18	8.81
Melissa officinalis	Somnolence	4	7.52	2.68	21.12	7.53	2.68	21.16
Curcuma longa	Somnolence	9	4.15	2.12	8.13	4.15	2.12	8.14
Melaleuca alternifolia	Somnolence	4	3.71	1.36	10.15	3.71	1.36	10.15
Melaleuca lutea	Somnolence	3	3.5	1.1	11.17	3.5	1.1	11.17
Tanacetum parthenium	Myalgia	3	6.43	1.99	20.8	6.43	1.99	20.81
Raphanus sativus	Myalgia	3	16.72	4.84	57.74	16.73	4.84	57.8
Cynara scolymus	Myalgia	4	5.77	2.1	15.89	5.77	2.09	15.9
Tribulus terrestris	Myalgia	3	4.64	1.45	14.84	4.65	1.45	14.88
Echinacea angustifolia	Myalgia	13	5.38	3.07	9.42	5.39	3.07	9.45
Panax quinquefolius	Myalgia	8	3.43	1.69	6.95	3.43	1.69	6.96
Hypericum perfoliatum	Paraesthesia	11	6.56	3.55	12.13	6.56	3.54	12.14
Hypericum perforatum	Paraesthesia	11	6.56	3.55	12.13	6.56	3.54	12.14
Allium salinum	Paraesthesia	13	3.76	2.16	6.56	3.76	2.15	6.56
Allium sativum	Paraesthesia	13	3.57	2.05	6.22	3.58	2.05	6.25
Helianthus annuus	Paraesthesia	3	12.23	3.62	41.32	12.24	3.62	41.37
Cinnamomum verum	Paraesthesia	4	3.92	1.44	10.7	3.92	1.44	10.71
Tribulus terrestris	Paraesthesia	3	4.3	1.34	13.75	4.31	1.35	13.79
Angelica archangelica	Paraesthesia	3	12.91	3.8	43.82	12.92	3.8	43.87
Schisandra chinensis	Paraesthesia	3	3.37	1.06	10.7	3.37	1.06	10.71
Attalea racemosa	Paraesthesia	5	5.31	2.15	13.14	5.31	2.15	13.14
Actaea cimicifuga	Paraesthesia	5	5.31	2.15	13.14	5.31	2.15	13.14
Actaea racemosa	Paraesthesia	5	5.31	2.15	13.14	5.31	2.15	13.14
Calendula officinalis	Paraesthesia	3	6.64	2.04	21.58	6.64	2.04	21.59
Malus sp	Paraesthesia	3	6.46	1.99	20.97	6.46	1.99	20.98
Hyssopus officinalis	Paraesthesia	3	8.01	2.44	26.29	8.02	2.44	26.33
Malus domestica	Paraesthesia	5	4.67	1.89	11.51	4.67	1.89	11.52
Ricinus communis	Abdominal discomfort	3	5.41	1.69	17.32	5.42	1.69	17.36
Aloe africana	Abdominal discomfort	5	5.94	2.41	14.66	5.94	2.4	14.67
Aloe bargalensis	Abdominal discomfort	5	4.79	1.95	11.76	4.79	1.95	11.77
Aloe succotrina	Abdominal discomfort	5	5.1	2.07	12.54	5.1	2.07	12.55
Aloe vallaris	Abdominal discomfort	5	5.94	2.41	14.66	5.94	2.4	14.67
Aloe vera	Abdominal discomfort	5	4.23	1.73	10.36	4.23	1.73	10.37
Arabis vochinensis	Abdominal discomfort	5	12.03	4.74	30.51	12.04	4.74	30.56
Aralia chinensis	Abdominal discomfort	5	12.03	4.74	30.51	12.04	4.74	30.56
Ginkgo biloba	Abdominal discomfort	8	3.38	1.67	6.84	3.39	1.67	6.87
Eleutherococcus senticosus	Abdominal discomfort	8	3.77	1.86	7.64	3.78	1.86	7.67
Linum usitatissimum	Abdominal discomfort	13	5.73	3.28	10.02	5.74	3.28	10.05
Withania somnifera	Abdominal discomfort	7	6.14	2.86	13.18	6.15	2.86	13.22
Angelica sinensis	Abdominal discomfort	4	10.43	3.71	29.29	10.43	3.71	29.31
Acacia chiapensis	Abdominal discomfort	5	12.03	4.74	30.51	12.04	4.74	30.56
Serenoa repens	Abdominal discomfort	6	5.87	2.57	13.39	5.87	2.57	13.4
Cola acuminata	Abdominal discomfort	3	4.77	1.5	15.21	4.77	1.49	15.22
Calea acuminata	Abdominal discomfort	3	4.77	1.5	15.21	4.77	1.49	15.22
Hydrastis canadensis	Abdominal discomfort	3	8.8	2.7	28.73	8.8	2.69	28.75
Foeniculum vulgare	Abdominal discomfort	4	4.13	1.52	11.24	4.13	1.52	11.25
Silybum marianum	Abdominal discomfort	7	3.14	1.48	6.67	3.15	1.48	6.69
Lepidium meyenii	Abdominal discomfort	5	4.69	1.91	11.51	4.7	1.91	11.54
Piper nigrum	Abdominal discomfort	3	5.63	1.76	18.05	5.63	1.76	18.06
Paullinia cupana	Abdominal discomfort	4	3.15	1.16	8.53	3.16	1.17	8.56
Theobroma cacao	Abdominal discomfort	4	6.26	2.28	17.22	6.26	2.27	17.23
Camellia siangensis	Abdominal discomfort	13	3.92	2.25	6.82	3.93	2.26	6.85
Camellia sinensis	Abdominal discomfort	17	3.82	2.35	6.2	3.83	2.36	6.22
Schisandra chinensis	Abdominal discomfort	3	4.08	1.28	12.96	4.08	1.28	12.97
Ananas comosus	Abdominal discomfort	6	6.12	2.68	13.97	6.13	2.68	14.01
Arctium lappa	Abdominal discomfort	4	4.22	1.55	11.49	4.22	1.55	11.5
Attalea racemosa	Abdominal discomfort	3	3.75	1.18	11.89	3.76	1.19	11.93
Actaea cimicifuga	Abdominal discomfort	3	3.75	1.18	11.89	3.76	1.19	11.93
Actaea racemosa	Abdominal discomfort	3	3.75	1.18	11.89	3.76	1.19	11.93
Passiflora incarnata	Abdominal discomfort	3	3.2	1.01	10.11	3.2	1.01	10.12
Borago officinalis	Abdominal discomfort	10	4.05	2.15	7.62	4.05	2.15	7.63
Aralia elata	Abdominal discomfort	5	12.03	4.74	30.51	12.04	4.74	30.56
Curcuma longa	Abdominal discomfort	7	4.41	2.07	9.41	4.41	2.07	9.42
Cinnamomum verum	Abdominal discomfort	6	7.31	3.19	16.77	7.32	3.19	16.81
Vaccinium macrocarpon	Abdominal discomfort	10	4.34	2.3	8.18	4.35	2.31	8.2
Glycyrrhiza uralensis	Abdominal discomfort	3	15.64	4.61	53.08	15.65	4.61	53.15
Morus alba	Abdominal discomfort	5	46.92	16.04	137.23	46.96	16.05	137.43
Punica granatum	Abdominal discomfort	7	10.77	4.93	23.54	10.78	4.93	23.58
Malpighia glabra	Abdominal discomfort	3	10.06	3.06	33.08	10.06	3.06	33.1
Coffea canephora	Abdominal discomfort	3	6.12	1.9	19.67	6.12	1.9	19.68
Medicago sativa	Abdominal discomfort	7	6.32	2.94	13.58	6.32	2.94	13.59
Oryza sativa	Abdominal discomfort	4	5.21	1.9	14.25	5.22	1.91	14.29
Chlorella vulgaris	Abdominal discomfort	5	12.03	4.74	30.51	12.04	4.74	30.56
Chlorella pyrenoidosa	Abdominal discomfort	5	12.03	4.74	30.51	12.04	4.74	30.56
Chlorella sp	Abdominal discomfort	5	12.03	4.74	30.51	12.04	4.74	30.56
Plantago notata	Abdominal discomfort	4	4.37	1.6	11.9	4.37	1.6	11.91
Plantago ovata	Abdominal discomfort	4	4.37	1.6	11.9	4.37	1.6	11.91
Brassica oleracea	Abdominal discomfort	3	5.52	1.72	17.68	5.52	1.72	17.69
Spinacia oleracea	Abdominal discomfort	3	11.26	3.4	37.28	11.27	3.4	37.34
Salvia hispanica	Abdominal discomfort	3	11.73	3.53	38.94	11.74	3.53	39
Euterpe oleracea	Abdominal discomfort	3	8.8	2.7	28.73	8.8	2.69	28.75
Garcinia mangostana	Abdominal discomfort	3	11.73	3.53	38.94	11.74	3.53	39
Lycium barbarum	Abdominal discomfort	4	6.26	2.28	17.22	6.26	2.27	17.23
Rhodiola rosea	Abdominal discomfort	3	3.31	1.05	10.47	3.31	1.05	10.47
Sedum griseum	Abdominal discomfort	3	3.52	1.11	11.14	3.52	1.11	11.15
Olea europaea	Abdominal discomfort	4	6.26	2.28	17.22	6.26	2.27	17.23
Oenothera biennis	Alopecia	3	5.11	1.62	16.08	5.11	1.62	16.1
Althaea officinalis	Alopecia	3	3.16	1.01	9.89	3.17	1.01	9.93
Linum usitatissimum	Alopecia	7	5.93	2.8	12.57	5.94	2.8	12.62
Prunus americana	Alopecia	3	15.46	4.76	50.17	15.48	4.76	50.3
Boswellia serrata	Alopecia	3	12.37	3.85	39.78	12.38	3.85	39.86
Vaccinium macrocarpon	Alopecia	4	3.34	1.24	8.97	3.35	1.25	9.01
Salvia alba	Accidental overdose	3	8.35	2.67	26.14	8.36	2.66	26.24
Salix alba	Accidental overdose	3	8.35	2.67	26.14	8.36	2.66	26.24
Cannabis sativa	Accidental overdose	9	3.95	2.05	7.6	3.97	2.05	7.67
Teucrium scorodonia	Nausea	3	12.83	2.87	57.32	12.83	2.87	57.33
Aloe africana	Nausea	14	3.42	1.93	6.07	3.42	1.93	6.07
Aloe bargalensis	Nausea	17	3.38	2.01	5.69	3.38	2.01	5.69
Aloe succotrina	Nausea	18	3.9	2.34	6.51	3.9	2.34	6.51
Aloe vallaris	Nausea	14	3.42	1.93	6.07	3.42	1.93	6.07
Aloe vera	Nausea	21	3.78	2.36	6.06	3.78	2.36	6.06
Althaea officinalis	Nausea	33	3.87	2.65	5.65	3.87	2.65	5.65
Zingiber officinale	Nausea	36	3.31	2.32	4.73	3.31	2.32	4.73
Salvia alba	Nausea	29	3.84	2.57	5.74	3.85	2.57	5.76
Salix alba	Nausea	29	3.84	2.57	5.74	3.85	2.57	5.76
Sida cordifolia	Nausea	3	4.66	1.3	16.7	4.66	1.3	16.7
Ephedra sinica	Nausea	16	3.8	2.21	6.53	3.8	2.21	6.53
Paullinia cupana	Nausea	23	3.93	2.5	6.18	3.94	2.5	6.2
Centella asiatica	Nausea	4	3.26	1.12	9.5	3.26	1.12	9.5
Ephedra sp	Nausea	16	3.8	2.21	6.53	3.8	2.21	6.53
Astragalus membranaceus	Nausea	12	3.42	1.84	6.36	3.42	1.84	6.36
Malus sp	Nausea	7	3.74	1.65	8.47	3.74	1.65	8.47
Cynara scolymus	Nausea	10	3.29	1.67	6.47	3.29	1.67	6.47
Medicago sativa	Nausea	17	3.09	1.84	5.18	3.09	1.84	5.18
Cola acuminata	Nausea	13	4.54	2.46	8.37	4.54	2.46	8.37
Calea acuminata	Nausea	13	4.54	2.46	8.37	4.54	2.46	8.37
Beta vulgaris	Nausea	9	5.13	2.44	10.8	5.13	2.44	10.81
Elymus repens	Nausea	4	5.26	1.72	16.13	5.26	1.71	16.13
Hordeum vulgare	Nausea	6	4.28	1.75	10.47	4.28	1.75	10.47
Oryza sativa	Nausea	17	4.93	2.87	8.45	4.93	2.87	8.46
Camellia siangensis	Nausea	57	3.65	2.74	4.86	3.66	2.75	4.87
Camellia sinensis	Nausea	65	3	2.31	3.9	3.01	2.31	3.92
Salvia purpurea	Nausea	5	7.13	2.51	20.24	7.13	2.51	20.24
Sabia purpurea	Nausea	5	7.13	2.51	20.24	7.13	2.51	20.24
Salix purpurea	Nausea	5	7.13	2.51	20.24	7.13	2.51	20.24
Garcinia gummi-gutta	Nausea	15	3.51	2.01	6.12	3.52	2.02	6.14
Lythrum salicaria	Nausea	5	7.13	2.51	20.24	7.13	2.51	20.24
Brassica oleracea	Nausea	12	4.89	2.57	9.29	4.89	2.57	9.29
Fumaria officinalis	Nausea	3	51.3	5.34	493.18	51.31	5.34	493.31
Carica papaya	Nausea	8	4.56	2.09	9.95	4.56	2.09	9.95
Ilex paraguariensis	Nausea	17	5.29	3.07	9.11	5.29	3.07	9.11
Taraxacum sp	Nausea	15	3.05	1.76	5.28	3.05	1.76	5.28
Cynara cardunculus	Nausea	10	3.29	1.67	6.47	3.29	1.67	6.47
Gymnema sylvestre	Nausea	9	3.95	1.91	8.15	3.95	1.91	8.15
Plectranthus barbatus	Nausea	7	4.6	2	10.6	4.6	2	10.6
Trifolium pratense	Nausea	9	3.66	1.78	7.52	3.67	1.79	7.54
Berberis vulgaris	Nausea	4	3.42	1.17	10.01	3.42	1.17	10.01
Arctium lappa	Nausea	15	3.29	1.89	5.72	3.29	1.89	5.72
Ziziphus sp	Nausea	3	3.95	1.13	13.86	3.95	1.13	13.86
Piper nigrum	Nausea	11	4.48	2.31	8.7	4.48	2.31	8.7
Commiphora wightii	Nausea	7	4.79	2.07	11.07	4.79	2.07	11.08
Theobroma cacao	Nausea	17	6.19	3.55	10.78	6.19	3.55	10.78
Lycopodium clavatum	Nausea	3	4.66	1.3	16.7	4.66	1.3	16.7
Urtica ardens	Nausea	3	17.1	3.45	84.72	17.1	3.45	84.73
Urtica urens	Nausea	3	17.1	3.45	84.72	17.1	3.45	84.73
Gentiana lutea	Nausea	6	11.4	4.06	32.03	11.4	4.06	32.03
Phyllanthus emblica	Nausea	10	4.28	2.14	8.56	4.28	2.14	8.56
Terminalia celebica	Nausea	4	6.22	1.98	19.53	6.22	1.98	19.54
Terminalia bellirica	Nausea	9	3.66	1.78	7.52	3.67	1.79	7.54
Withania somnifera	Nausea	19	3.42	2.09	5.6	3.42	2.09	5.6
Angelica archangelica	Nausea	4	4.02	1.35	11.95	4.02	1.35	11.95
Inula helenium	Nausea	3	8.55	2.14	34.19	8.55	2.14	34.19
Lepidium meyenii	Nausea	20	4.02	2.47	6.54	4.03	2.48	6.56
Schizonepeta tenuifolia	Nausea	3	4.28	1.21	15.17	4.28	1.21	15.17
Sambucus canadensis	Nausea	6	4.89	1.97	12.11	4.89	1.97	12.12
Sambucus nigra	Nausea	6	4.89	1.97	12.11	4.89	1.97	12.12
Bupleurum chinense	Nausea	3	10.26	2.45	42.93	10.26	2.45	42.93
Bupleurum eginense	Nausea	3	10.26	2.45	42.93	10.26	2.45	42.93
Coffea arabica	Nausea	8	4.15	1.92	8.98	4.15	1.92	8.99
Ulmus rubra	Nausea	6	4.46	1.82	10.95	4.46	1.82	10.95
Opuntia streptacantha	Nausea	3	7.33	1.9	28.35	7.33	1.9	28.35
Rhodiola rosea	Nausea	14	3.24	1.83	5.74	3.24	1.83	5.74
Sedum griseum	Nausea	14	3.47	1.95	6.16	3.47	1.95	6.16
Schisandra chinensis	Nausea	12	3.42	1.84	6.36	3.42	1.84	6.36
Azadirachta indica	Nausea	4	6.22	1.98	19.53	6.22	1.98	19.54
Malus domestica	Nausea	14	3.24	1.83	5.74	3.24	1.83	5.74
Rheum palmatum	Nausea	5	3.72	1.41	9.78	3.72	1.41	9.79
Verbascum thapsus	Nausea	5	5.03	1.86	13.63	5.03	1.86	13.63
Brassica rapa	Nausea	13	5.29	2.84	9.85	5.29	2.84	9.86
Terminalia catappa	Nausea	9	3.66	1.78	7.52	3.67	1.79	7.54
Rumex crispus	Nausea	7	3.86	1.7	8.77	3.86	1.7	8.77
Rumex crassus	Nausea	7	3.86	1.7	8.77	3.86	1.7	8.77
Salvia sclarea	Nausea	3	12.83	2.87	57.32	12.83	2.87	57.33
Terminalia chebula	Nausea	8	3.34	1.57	7.12	3.34	1.57	7.13
Hyssopus officinalis	Nausea	7	4.79	2.07	11.07	4.79	2.07	11.08
Citrus grandis	Nausea	22	3.01	1.91	4.73	3.01	1.91	4.74
Garcinia mangostana	Nausea	10	10.06	4.61	21.97	10.06	4.61	21.97
Astragalus propinquus	Nausea	12	3.42	1.84	6.36	3.42	1.84	6.36
Cichorium intybus	Nausea	3	3.66	1.05	12.74	3.66	1.05	12.74
Punica granatum	Nausea	12	3.66	1.96	6.83	3.67	1.97	6.85
Chlorella vulgaris	Nausea	13	7.17	3.75	13.7	7.17	3.75	13.7
Chlorella pyrenoidosa	Nausea	13	7.17	3.75	13.7	7.17	3.75	13.7
Chlorella sp	Nausea	13	7.17	3.75	13.7	7.17	3.75	13.7
Lycium barbarum	Nausea	15	5.23	2.93	9.32	5.24	2.94	9.34
Malpighia glabra	Nausea	6	4.1	1.68	9.99	4.1	1.68	10
Palmaria palmata	Nausea	5	4.5	1.68	12.05	4.5	1.68	12.05
Coffea canephora	Nausea	10	4.38	2.19	8.77	4.39	2.19	8.79
Spinacia oleracea	Nausea	8	6.84	3.01	15.53	6.84	3.01	15.53
Euterpe oleracea	Nausea	9	5.92	2.77	12.63	5.92	2.77	12.63
Nepeta cataria	Nausea	4	4.89	1.61	14.86	4.89	1.61	14.86
Hebanthe eriantha	Nausea	6	6.84	2.65	17.63	6.84	2.65	17.63
Salvia hispanica	Nausea	7	5.99	2.53	14.16	5.99	2.53	14.17
Aristotelia chilensis	Nausea	6	10.26	3.73	28.23	10.26	3.73	28.23
Cinnamomum cassia	Nausea	6	4.1	1.68	9.99	4.1	1.68	10
Cinnamomum aromaticum	Nausea	6	4.1	1.68	9.99	4.1	1.68	10
Achillea millefolium	Vomiting	5	4.49	1.74	11.6	4.49	1.74	11.6
Althaea officinalis	Vomiting	28	4.83	3.23	7.23	4.83	3.23	7.23
Salvia purpurea	Vomiting	4	8.01	2.61	24.56	8.01	2.61	24.57
Ephedra sinica	Vomiting	14	4.92	2.78	8.71	4.93	2.78	8.73
Salvia alba	Vomiting	26	5.13	3.37	7.81	5.13	3.37	7.81
Sabia purpurea	Vomiting	4	8.01	2.61	24.56	8.01	2.61	24.57
Salix alba	Vomiting	26	5.13	3.37	7.81	5.13	3.37	7.81
Salix purpurea	Vomiting	4	8.01	2.61	24.56	8.01	2.61	24.57
Lythrum salicaria	Vomiting	4	8.01	2.61	24.56	8.01	2.61	24.57
Paullinia cupana	Vomiting	20	5.05	3.13	8.15	5.06	3.13	8.17
Ephedra sp	Vomiting	14	4.92	2.78	8.71	4.93	2.78	8.73
Aloe bargalensis	Vomiting	11	3.11	1.66	5.81	3.11	1.66	5.81
Aloe vera	Vomiting	13	3.29	1.85	5.86	3.29	1.85	5.86
Cola acuminata	Vomiting	9	4.42	2.18	8.96	4.42	2.18	8.96
Calea acuminata	Vomiting	9	4.42	2.18	8.96	4.42	2.18	8.96
Raphanus sativus	Vomiting	3	5.21	1.51	18	5.21	1.51	18
Peumus boldus	Vomiting	5	9.3	3.35	25.82	9.3	3.35	25.82
Cynara scolymus	Vomiting	12	6.25	3.33	11.73	6.25	3.33	11.74
Taraxacum officinale	Vomiting	15	4.15	2.41	7.16	4.16	2.41	7.18
Zingiber officinale	Vomiting	32	4.38	3.01	6.37	4.39	3.02	6.39
Eleutherococcus senticosus	Vomiting	27	3.9	2.6	5.84	3.91	2.61	5.86
Centella asiatica	Vomiting	3	3.55	1.06	11.86	3.55	1.06	11.86
Astragalus membranaceus	Vomiting	11	4.69	2.47	8.91	4.7	2.47	8.93
Piper methysticum	Vomiting	5	6.51	2.44	17.34	6.51	2.44	17.35
Petroselinum crispum	Vomiting	6	3.39	1.45	7.94	3.4	1.45	7.96
Medicago sativa	Vomiting	24	7.18	4.57	11.28	7.19	4.57	11.3
Brassica oleracea	Vomiting	19	14.13	8.08	24.7	14.14	8.09	24.72
Fumaria officinalis	Vomiting	3	78.08	8.12	750.62	78.09	8.12	750.78
Carica papaya	Vomiting	5	3.94	1.54	10.09	3.94	1.54	10.09
Camellia siangensis	Vomiting	39	3.56	2.55	4.97	3.57	2.55	4.99
Camellia sinensis	Vomiting	46	3.08	2.27	4.18	3.08	2.27	4.18
Ilex paraguariensis	Vomiting	13	5.73	3.14	10.44	5.74	3.15	10.47
Daucus carota	Vomiting	3	13.01	3.25	52.02	13.02	3.26	52.06
Foeniculum vulgare	Vomiting	14	4.5	2.55	7.93	4.5	2.55	7.94
Taraxacum sp	Vomiting	11	3.25	1.74	6.08	3.25	1.74	6.08
Cynara cardunculus	Vomiting	12	6.25	3.33	11.73	6.25	3.33	11.74
Carapichea ipecacuanha	Vomiting	4	3.72	1.3	10.6	3.72	1.3	10.61
Bryonia alba	Vomiting	5	5.92	2.24	15.63	5.92	2.24	15.63
Rumex crispus	Vomiting	9	8.08	3.83	17.07	8.08	3.82	17.07
Rumex crassus	Vomiting	9	8.08	3.83	17.07	8.08	3.82	17.07
Gymnema sylvestre	Vomiting	5	3.03	1.2	7.65	3.03	1.2	7.65
Calendula officinalis	Vomiting	5	3.94	1.54	10.09	3.94	1.54	10.09
Capsicum annuum	Vomiting	24	3.27	2.14	5	3.27	2.14	5
Berberis vulgaris	Vomiting	3	3.72	1.11	12.47	3.72	1.11	12.47
Arctium lappa	Vomiting	13	4.23	2.35	7.6	4.23	2.35	7.6
Plectranthus barbatus	Vomiting	5	4.65	1.8	12.04	4.65	1.8	12.04
Saccharum officinarum	Vomiting	3	4.88	1.42	16.75	4.88	1.42	16.75
Beta vulgaris	Vomiting	5	3.83	1.5	9.79	3.83	1.5	9.79
Elymus repens	Vomiting	3	5.58	1.6	19.42	5.58	1.6	19.42
Oryza sativa	Vomiting	22	10.6	6.46	17.4	10.61	6.46	17.42
Vaccinium myrtillus	Vomiting	12	3.59	1.96	6.56	3.59	1.96	6.57
Piper nigrum	Vomiting	6	3.32	1.42	7.76	3.32	1.42	7.77
Theobroma cacao	Vomiting	16	8.68	4.93	15.28	8.68	4.93	15.29
Smilax aspera	Vomiting	3	4.11	1.22	13.89	4.11	1.22	13.89
Smilax officinalis	Vomiting	3	3.9	1.16	13.12	3.9	1.16	13.13
Citrullus lanatus	Vomiting	4	14.87	4.35	50.79	14.88	4.36	50.84
Gentiana lutea	Vomiting	3	6.51	1.84	23.07	6.51	1.84	23.07
Phyllanthus emblica	Vomiting	8	4.96	2.33	10.56	4.96	2.33	10.57
Cinnamomum verum	Vomiting	14	5.28	2.97	9.38	5.28	2.97	9.38
Tribulus terrestris	Vomiting	6	3.06	1.31	7.13	3.06	1.31	7.13
Terminalia celebica	Vomiting	3	6.51	1.84	23.07	6.51	1.84	23.07
Terminalia bellirica	Vomiting	9	5.58	2.72	11.46	5.58	2.72	11.46
Withania somnifera	Vomiting	23	6.58	4.17	10.39	6.58	4.16	10.4
Linum usitatissimum	Vomiting	27	3.53	2.36	5.28	3.53	2.36	5.28
Mentha piperita	Vomiting	10	3.83	1.97	7.44	3.83	1.97	7.44
Allium cepa	Vomiting	3	6.01	1.71	21.09	6.01	1.71	21.09
Aconitum napellus	Vomiting	4	5.78	1.96	17.08	5.78	1.96	17.08
Arnica montana	Vomiting	4	4	1.4	11.46	4	1.4	11.46
Senna occidentalis	Vomiting	5	18.59	5.9	58.57	18.6	5.9	58.61
Terminalia chebula	Vomiting	8	5.08	2.38	10.83	5.08	2.38	10.84
Capsicum baccatum	Vomiting	24	3.27	2.14	5	3.27	2.14	5
Capsicum frutescens	Vomiting	24	3.27	2.14	5	3.27	2.14	5
Rhodiola rosea	Vomiting	13	4.51	2.5	8.13	4.51	2.5	8.13
Sedum griseum	Vomiting	12	4.4	2.39	8.11	4.4	2.39	8.11
Origanum vulgare	Vomiting	6	3.19	1.37	7.45	3.19	1.37	7.45
Lepidium meyenii	Vomiting	25	8.13	5.19	12.74	8.14	5.19	12.76
Glycyrrhiza glabra	Vomiting	21	3.9	2.47	6.17	3.91	2.47	6.19
Citrus reticulata	Vomiting	15	3.1	1.82	5.29	3.1	1.81	5.3
Citrus nobilis	Vomiting	15	3.2	1.87	5.47	3.2	1.87	5.47
Mucuna pruriens	Vomiting	5	4.34	1.68	11.18	4.34	1.68	11.19
Vaccinium corymbosum	Vomiting	6	6.51	2.66	15.92	6.51	2.66	15.93
Bacopa monnieri	Vomiting	7	4.24	1.91	9.42	4.24	1.91	9.43
Lycium chinense	Vomiting	20	9.64	5.77	16.1	9.65	5.78	16.12
Coffea arabica	Vomiting	7	5.36	2.38	12.09	5.36	2.38	12.09
Euterpe oleracea	Vomiting	16	21.92	11.27	42.62	21.93	11.28	42.65
Terminalia catappa	Vomiting	9	5.58	2.72	11.46	5.58	2.72	11.46
Chlorella vulgaris	Vomiting	20	21.69	11.98	39.26	21.71	11.99	39.31
Chlorella pyrenoidosa	Vomiting	20	21.69	11.98	39.26	21.71	11.99	39.31
Chlorella sp	Vomiting	20	21.69	11.98	39.26	21.71	11.99	39.31
Hyssopus officinalis	Vomiting	7	7.29	3.15	16.85	7.29	3.15	16.86
Spinacia oleracea	Vomiting	16	34.7	16.42	73.34	34.73	16.43	73.42
Salvia hispanica	Vomiting	13	24.17	11.36	51.41	24.18	11.36	51.45
Garcinia mangostana	Vomiting	15	32.53	15.23	69.49	32.56	15.24	69.57
Punica granatum	Vomiting	20	10.84	6.44	18.26	10.85	6.44	18.28
Lycium barbarum	Vomiting	19	10.99	6.43	18.78	11	6.43	18.81
Coffea canephora	Vomiting	9	5.86	2.84	12.07	5.86	2.84	12.08
Melaleuca alternifolia	Vomiting	8	3.02	1.45	6.28	3.02	1.45	6.28
Olea europaea	Vomiting	9	4.26	2.11	8.62	4.26	2.11	8.62
Cinnamomum cassia	Vomiting	9	10.65	4.9	23.13	10.65	4.9	23.13
Cinnamomum aromaticum	Vomiting	9	10.65	4.9	23.13	10.65	4.9	23.13
Aristotelia chilensis	Vomiting	8	26.03	9.77	69.35	26.04	9.77	69.39
Astragalus propinquus	Vomiting	11	4.69	2.47	8.91	4.7	2.47	8.93
Rhododendron luteum	Vomiting	4	6.51	2.18	19.47	6.51	2.18	19.47
Rhododendron aureum	Vomiting	4	6.51	2.18	19.47	6.51	2.18	19.47
Malpighia glabra	Vomiting	5	5.01	1.92	13.05	5.01	1.92	13.05
Palmaria palmata	Vomiting	3	3.72	1.11	12.47	3.72	1.11	12.47
Hebanthe eriantha	Vomiting	4	6.12	2.06	18.19	6.13	2.06	18.22
Serenoa repens	Asthenia	7	3.2	1.49	6.89	3.2	1.48	6.9
Rubus idaeus	Asthenia	3	4.49	1.37	14.74	4.49	1.37	14.74
Astragalus membranaceus	Asthenia	5	3.24	1.31	8.04	3.24	1.31	8.04
Medicago sativa	Asthenia	12	5.26	2.89	9.57	5.26	2.89	9.58
Curcuma longa	Asthenia	13	3.94	2.23	6.95	3.95	2.24	6.97
Curcuma zanthorrhiza	Asthenia	5	4.02	1.61	10.05	4.02	1.61	10.05
Curcuma xanthorrhiza	Asthenia	5	4.02	1.61	10.05	4.02	1.61	10.05
Zea mays	Asthenia	4	3.27	1.18	9.03	3.27	1.18	9.04
Arctostaphylos uva-ursi	Asthenia	5	4.93	1.96	12.43	4.93	1.95	12.44
Malus sp	Asthenia	3	3.61	1.11	11.72	3.61	1.11	11.72
Cynara cardunculus	Asthenia	5	3.8	1.52	9.48	3.81	1.53	9.51
Ilex paraguariensis	Asthenia	6	3.94	1.71	9.09	3.94	1.71	9.09
Hydrastis canadensis	Asthenia	3	4.07	1.25	13.29	4.07	1.25	13.29
Smilax aristolochiifolia	Asthenia	3	4.82	1.46	15.89	4.82	1.46	15.89
Smilax aspera	Asthenia	3	6.85	2.03	23.15	6.85	2.03	23.15
Smilax officinalis	Asthenia	3	6.5	1.93	21.87	6.51	1.93	21.91
Citrullus lanatus	Asthenia	3	16.26	4.31	61.28	16.27	4.32	61.34
Juniperus communis	Asthenia	4	3.04	1.1	8.38	3.04	1.1	8.38
Elymus repens	Asthenia	3	9.29	2.67	32.32	9.29	2.67	32.33
Oryza sativa	Asthenia	8	5.1	2.45	10.61	5.1	2.45	10.61
Lepidium meyenii	Asthenia	8	3.58	1.74	7.36	3.58	1.74	7.36
Glycyrrhiza glabra	Asthenia	11	3.18	1.72	5.86	3.18	1.72	5.87
Rheum palmatum	Asthenia	4	7.23	2.51	20.83	7.23	2.51	20.84
Rhodiola rosea	Asthenia	6	3.17	1.38	7.26	3.17	1.38	7.26
Tribulus terrestris	Asthenia	4	3.27	1.18	9.03	3.27	1.18	9.04
Vaccinium angustifolium	Asthenia	3	7.65	2.24	26.1	7.65	2.24	26.11
Vaccinium stenophyllum	Asthenia	3	7.65	2.24	26.1	7.65	2.24	26.11
Lycium chinense	Asthenia	7	4.53	2.08	9.87	4.53	2.08	9.87
Equisetum arvense	Asthenia	3	3.34	1.03	10.81	3.34	1.03	10.81
Panax quinquefolius	Asthenia	15	3.46	2.05	5.85	3.46	2.04	5.86
Dioscorea composita	Asthenia	3	4.2	1.28	13.74	4.2	1.28	13.74
Euterpe oleracea	Asthenia	5	7.23	2.81	18.63	7.23	2.8	18.64
Crataegus pinnatifida	Asthenia	4	3.94	1.42	10.96	3.94	1.42	10.97
Terminalia catappa	Asthenia	4	3.69	1.33	10.24	3.69	1.33	10.24
Chlorella vulgaris	Asthenia	6	6.85	2.9	16.2	6.85	2.9	16.21
Chlorella pyrenoidosa	Asthenia	6	6.85	2.9	16.2	6.85	2.9	16.21
Chlorella sp	Asthenia	6	6.85	2.9	16.2	6.85	2.9	16.21
Brassica oleracea	Asthenia	5	4.42	1.76	11.09	4.43	1.76	11.12
Spinacia oleracea	Asthenia	4	7.23	2.51	20.83	7.23	2.51	20.84
Salvia hispanica	Asthenia	3	5.42	1.63	18	5.42	1.63	18
Garcinia mangostana	Asthenia	4	7.54	2.61	21.8	7.54	2.61	21.81
Lycium barbarum	Asthenia	5	3.67	1.47	9.14	3.68	1.48	9.17
Malpighia glabra	Asthenia	3	4.65	1.41	15.29	4.65	1.41	15.3
Malus domestica	Asthenia	6	3.17	1.38	7.26	3.17	1.38	7.26
Ginkgo biloba	Dizziness	24	3.04	1.99	4.64	3.04	1.99	4.64
Coffea arabica	Dizziness	7	5.37	2.38	12.11	5.37	2.38	12.12
Beta vulgaris	Dizziness	6	4.74	1.99	11.31	4.74	1.99	11.31
Curcuma zanthorrhiza	Dizziness	7	3.51	1.59	7.73	3.51	1.59	7.73
Petroselinum crispum	Dizziness	7	4.05	1.83	8.98	4.05	1.83	8.98
Cynara cardunculus	Dizziness	7	3.32	1.51	7.29	3.32	1.51	7.29
Taraxacum officinale	Dizziness	12	3.22	1.77	5.86	3.23	1.77	5.89
Curcuma xanthorrhiza	Dizziness	7	3.51	1.59	7.73	3.51	1.59	7.73
Taraxacum sp	Dizziness	12	3.59	1.96	6.56	3.6	1.97	6.58
Ephedra sinica	Dizziness	10	3.34	1.73	6.45	3.34	1.73	6.45
Paullinia cupana	Dizziness	17	4.18	2.51	6.97	4.18	2.5	6.98
Ephedra sp	Dizziness	10	3.34	1.73	6.45	3.34	1.73	6.45
Juniperus communis	Dizziness	8	3.93	1.87	8.26	3.93	1.87	8.27
Agathosma betulina	Dizziness	4	9.48	3.02	29.77	9.48	3.02	29.77
Arctostaphylos uva-ursi	Dizziness	6	3.64	1.55	8.55	3.64	1.55	8.55
Fallopia multiflora	Dizziness	4	6.95	2.31	20.94	6.95	2.31	20.94
Ilex paraguariensis	Dizziness	12	5.21	2.8	9.68	5.21	2.8	9.68
Valeriana officinalis	Dizziness	11	3.45	1.84	6.47	3.45	1.84	6.47
Salvia alba	Dizziness	19	3.56	2.2	5.75	3.56	2.2	5.75
Salix alba	Dizziness	19	3.56	2.2	5.75	3.56	2.2	5.75
Cola acuminata	Dizziness	11	5.62	2.93	10.78	5.62	2.93	10.78
Calea acuminata	Dizziness	11	5.62	2.93	10.78	5.62	2.93	10.78
Plectranthus barbatus	Dizziness	4	3.59	1.26	10.21	3.59	1.26	10.21
Turnera diffusa	Dizziness	5	5.43	2.07	14.23	5.43	2.07	14.23
Cercis canadensis	Dizziness	3	4.6	1.35	15.7	4.6	1.35	15.7
Ananas comosus	Dizziness	12	3.64	1.99	6.66	3.64	1.99	6.66
Smilax aristolochiifolia	Dizziness	5	5.21	1.99	13.61	5.21	1.99	13.61
Smilax aspera	Dizziness	4	5.79	1.96	17.11	5.79	1.96	17.11
Smilax officinalis	Dizziness	4	5.49	1.87	16.14	5.49	1.87	16.14
Cornus canadensis	Dizziness	3	4.6	1.35	15.7	4.6	1.35	15.7
Boswellia serrata	Dizziness	5	3.03	1.2	7.65	3.03	1.2	7.65
Harpagophytum procumbens	Dizziness	6	3.47	1.48	8.13	3.48	1.48	8.16
Tanacetum parthenium	Dizziness	5	3.52	1.38	8.96	3.52	1.38	8.96
Calendula officinalis	Dizziness	5	3.95	1.54	10.12	3.95	1.54	10.12
Camellia siangensis	Dizziness	35	3.16	2.23	4.49	3.16	2.22	4.49
Gymnema sylvestre	Dizziness	5	3.03	1.2	7.65	3.03	1.2	7.65
Cytisus scoparius	Dizziness	5	3.34	1.32	8.47	3.34	1.32	8.47
Passiflora incarnata	Dizziness	10	3.22	1.67	6.21	3.22	1.67	6.21
Schisandra sphenanthera	Dizziness	4	4.01	1.4	11.49	4.01	1.4	11.49
Piper nigrum	Dizziness	11	6.82	3.51	13.24	6.83	3.52	13.27
Schizonepeta tenuifolia	Dizziness	4	9.48	3.02	29.77	9.48	3.02	29.77
Cynara scolymus	Dizziness	7	3.32	1.51	7.29	3.32	1.51	7.29
Terminalia celebica	Dizziness	5	13.03	4.45	38.12	13.03	4.45	38.13
Eucommia ulmoides	Dizziness	3	26.06	5.26	129.11	26.06	5.26	129.13
Opuntia streptacantha	Dizziness	3	11.17	2.89	43.19	11.17	2.89	43.2
Althaea officinalis	Dizziness	22	3.65	2.34	5.7	3.65	2.34	5.7
Eurycoma longifolia	Dizziness	3	19.54	4.37	87.3	19.55	4.38	87.36
Elymus repens	Dizziness	3	5.58	1.6	19.42	5.58	1.6	19.42
Rheum palmatum	Dizziness	5	5.66	2.15	14.89	5.67	2.16	14.92
Glycyrrhiza uralensis	Dizziness	3	4.34	1.28	14.73	4.34	1.28	14.74
Helianthus annuus	Dizziness	3	4.11	1.22	13.89	4.11	1.22	13.89
Euterpe oleracea	Dizziness	4	3.36	1.19	9.52	3.36	1.19	9.52
Terminalia catappa	Dizziness	6	3.47	1.48	8.13	3.48	1.48	8.16
Aconitum carmichaeli	Dizziness	3	39.09	6.53	233.93	39.09	6.53	233.96
Embelia ribes	Dizziness	3	39.09	6.53	233.93	39.09	6.53	233.96
Aconitum carmichaelii	Dizziness	3	39.09	6.53	233.93	39.09	6.53	233.96
Oryza sativa	Dizziness	8	3.07	1.48	6.39	3.07	1.48	6.39
Malpighia glabra	Dizziness	4	3.86	1.35	11.03	3.86	1.35	11.03
Chlorella vulgaris	Dizziness	6	4.11	1.74	9.72	4.12	1.74	9.75
Palmaria palmata	Dizziness	3	3.72	1.11	12.47	3.72	1.11	12.47
Chlorella pyrenoidosa	Dizziness	6	4.11	1.74	9.72	4.12	1.74	9.75
Chlorella sp	Dizziness	6	4.11	1.74	9.72	4.12	1.74	9.75
Malus domestica	Dizziness	10	3.34	1.73	6.45	3.34	1.73	6.45
Coffea canephora	Dizziness	9	5.86	2.84	12.07	5.87	2.85	12.1
Pinus pinaster	Dizziness	3	3.91	1.16	13.16	3.91	1.16	13.16
Trigonella foenum-graecum	Dizziness	5	3.18	1.26	8.05	3.18	1.26	8.05
Citrus aurantiifolia	Dizziness	15	3.08	1.8	5.26	3.08	1.8	5.26
Digitaria purpurea	Drug level increased	3	8.16	2.59	25.74	8.17	2.59	25.81
Digitalis purpurea	Drug level increased	3	8.16	2.59	25.74	8.17	2.59	25.81
Rhamnus purshiana	Disorientation	6	5.88	2.62	13.19	5.9	2.62	13.26
Triticum aestivum	Disorientation	3	10.92	3.44	34.62	10.94	3.45	34.74
Triticum aestivum	Disorientation	3	11.23	3.54	35.62	11.24	3.54	35.71
Valeriana officinalis	Disorientation	5	14.93	6.07	36.71	14.96	6.07	36.87
Panax ginseng	Disorientation	5	3.23	1.34	7.79	3.24	1.34	7.83
Serenoa repens	Dysphonia	3	9.9	3.14	31.19	9.92	3.14	31.32
Eucalyptus globulus	Dysphonia	3	7.91	2.52	24.84	7.92	2.52	24.92
Panax ginseng	Dysphonia	5	3.98	1.65	9.6	3.98	1.65	9.63
Medicago sativa	Muscle spasms	6	6.23	2.74	14.18	6.24	2.74	14.21
Hypericum perfoliatum	Muscle spasms	4	3.18	1.18	8.59	3.18	1.18	8.6
Hypericum perforatum	Muscle spasms	4	3.18	1.18	8.59	3.18	1.18	8.6
Silybum marianum	Muscle spasms	13	6.98	3.99	12.22	7	3.99	12.27
Taraxacum officinale	Muscle spasms	5	5.24	2.14	12.85	5.25	2.14	12.88
Matricaria chamomilla	Muscle spasms	4	5.81	2.13	15.88	5.82	2.13	15.92
Taraxacum sp	Muscle spasms	5	5.8	2.36	14.25	5.8	2.36	14.27
Ananas comosus	Muscle spasms	3	3.44	1.09	10.85	3.44	1.09	10.86
Aloe africana	Muscle spasms	4	5.45	2	14.87	5.45	2	14.88
Aloe bargalensis	Muscle spasms	4	4.4	1.62	11.95	4.41	1.62	11.99
Aloe succotrina	Muscle spasms	5	5.93	2.41	14.58	5.93	2.41	14.59
Aloe vallaris	Muscle spasms	4	5.45	2	14.87	5.45	2	14.88
Aloe vera	Muscle spasms	5	4.91	2.01	12.02	4.91	2	12.03
Coffea arabica	Muscle spasms	3	8.61	2.66	27.88	8.61	2.66	27.9
Camellia siangensis	Muscle spasms	12	4.19	2.36	7.45	4.2	2.36	7.48
Camellia sinensis	Muscle spasms	12	3.09	1.74	5.48	3.1	1.75	5.51
Foeniculum vulgare	Muscle spasms	4	4.79	1.76	13.03	4.8	1.76	13.07
Arctium lappa	Muscle spasms	5	6.19	2.52	15.23	6.2	2.52	15.27
Cinnamomum verum	Muscle spasms	6	8.5	3.71	19.5	8.5	3.7	19.52
Passiflora incarnata	Muscle spasms	3	3.72	1.18	11.75	3.72	1.18	11.76
Borago officinalis	Muscle spasms	11	5.19	2.84	9.5	5.2	2.84	9.53
Trifolium pratense	Muscle spasms	3	6.81	2.12	21.86	6.82	2.12	21.9
Arctostaphylos uva-ursi	Muscle spasms	3	7.11	2.21	22.85	7.11	2.21	22.87
Mentha spicata	Muscle spasms	5	13.3	5.26	33.64	13.31	5.26	33.7
Uncaria tomentosa	Muscle spasms	3	15.57	4.65	52.18	15.58	4.65	52.25
Eleutherococcus senticosus	Muscle spasms	8	4.38	2.16	8.88	4.39	2.16	8.91
Glycyrrhiza glabra	Muscle spasms	7	4.96	2.33	10.57	4.96	2.32	10.58
Zingiber officinale	Muscle spasms	7	3.55	1.67	7.53	3.55	1.67	7.54
Hydrastis canadensis	Muscle spasms	3	10.22	3.13	33.36	10.23	3.13	33.42
Rheum palmatum	Muscle spasms	4	18.17	6.31	52.35	18.18	6.31	52.42
Rumex crispus	Muscle spasms	3	9.34	2.87	30.36	9.35	2.87	30.41
Valeriana officinalis	Muscle spasms	3	3.59	1.14	11.34	3.6	1.14	11.37
Rumex crassus	Muscle spasms	3	9.34	2.87	30.36	9.35	2.87	30.41
Lepidium meyenii	Muscle spasms	4	4.32	1.59	11.73	4.32	1.59	11.74
Mucuna pruriens	Muscle spasms	4	14.07	4.97	39.84	14.08	4.97	39.9
Phyllanthus emblica	Muscle spasms	4	9.48	3.41	26.32	9.49	3.41	26.37
Rhodiola rosea	Muscle spasms	5	6.57	2.67	16.19	6.57	2.66	16.21
Sedum griseum	Muscle spasms	5	6.99	2.83	17.26	6.99	2.83	17.27
Tribulus terrestris	Muscle spasms	5	10.48	4.19	26.23	10.49	4.19	26.27
Terminalia chebula	Muscle spasms	4	9.69	3.49	26.93	9.7	3.49	26.98
Vaccinium corymbosum	Muscle spasms	3	12.11	3.67	39.91	12.12	3.68	39.97
Bacopa monnieri	Muscle spasms	8	20.77	9.76	44.22	20.8	9.76	44.33
Lycium chinense	Muscle spasms	4	6.23	2.28	17.06	6.23	2.27	17.07
Withania somnifera	Muscle spasms	9	9.34	4.73	18.44	9.36	4.74	18.5
Panax quinquefolius	Muscle spasms	8	4.47	2.21	9.06	4.48	2.21	9.09
Vaccinium myrtillus	Muscle spasms	4	4.59	1.69	12.48	4.59	1.69	12.49
Palmaria palmata	Muscle spasms	3	15.57	4.65	52.18	15.58	4.65	52.25
Hyssopus officinalis	Muscle spasms	4	15.57	5.46	44.37	15.59	5.47	44.46
Mentha piperita	Muscle spasms	4	5.89	2.15	16.1	5.9	2.16	16.14
Plantago notata	Muscle spasms	3	3.76	1.19	11.88	3.76	1.19	11.89
Plantago ovata	Muscle spasms	3	3.76	1.19	11.88	3.76	1.19	11.89
Capsicum annuum	Muscle spasms	6	3.13	1.39	7.04	3.13	1.39	7.05
Curcuma longa	Muscle spasms	8	5.89	2.89	11.99	5.9	2.89	12.02
Cinnamomum cassia	Muscle spasms	3	11.68	3.55	38.41	11.69	3.55	38.47
Theobroma cacao	Muscle spasms	3	5.36	1.68	17.08	5.36	1.68	17.09
Rhododendron luteum	Muscle spasms	3	19.24	5.64	65.63	19.25	5.64	65.71
Rhododendron aureum	Muscle spasms	3	19.24	5.64	65.63	19.25	5.64	65.71
Lycium barbarum	Muscle spasms	3	5.36	1.68	17.08	5.36	1.68	17.09
Cinnamomum aromaticum	Muscle spasms	3	11.68	3.55	38.41	11.69	3.55	38.47
Schisandra chinensis	Muscle spasms	3	4.74	1.49	15.05	4.74	1.49	15.06
Tanacetum parthenium	Therapeutic response decreased	3	9	2.78	29.11	9.01	2.78	29.17
Glycine soja	Cyanosis	3	8.66	2.76	27.15	8.68	2.76	27.28
Linum usitatissimum	Cyanosis	3	5.32	1.7	16.6	5.33	1.7	16.67
Frangula purshiana	Cyanosis	3	4.33	1.39	13.49	4.34	1.39	13.56
Zingiber officinale	Haematuria	3	7.07	2.27	22.06	7.09	2.27	22.19
Capsicum annuum	Haematuria	3	7.3	2.34	22.78	7.32	2.34	22.92
Ginkgo biloba	Melaena	3	6.02	1.93	18.78	6.03	1.93	18.86
Atropa belladonna	Hallucination	4	3.36	1.25	9.02	3.36	1.25	9.04
Salvia divinorum	Hallucination	3	567.09	59	5450.33	567.69	59.03	5459.37
Rhamnus purshiana	Confusional state	13	3.82	2.19	6.66	3.82	2.19	6.67
Triticum aestivum	Confusional state	10	11.75	6.04	22.84	11.77	6.05	22.9
Triticum aestivum	Confusional state	10	12.12	6.23	23.59	12.14	6.23	23.65
Hypericum perfoliatum	Confusional state	6	3.45	1.52	7.81	3.45	1.52	7.82
Hypericum perforatum	Confusional state	6	3.45	1.52	7.81	3.45	1.52	7.82
Salvia divinorum	Confusional state	3	232.68	24.21	2236.69	232.79	24.21	2238.31
Ziziphus jujuba	Confusional state	4	18.25	6.14	54.22	18.26	6.14	54.28
Humulus lupulus	Confusional state	3	6.84	2.1	22.27	6.85	2.1	22.31
Valeriana officinalis	Confusional state	5	4.36	1.77	10.73	4.36	1.77	10.74
Schisandra chinensis	Confusional state	5	5.79	2.33	14.36	5.79	2.33	14.37
Schisandra sphenanthera	Confusional state	3	8.62	2.62	28.41	8.62	2.61	28.42
Ziziphus sp	Confusional state	3	17.9	5.1	62.8	17.91	5.1	62.86
Tribulus terrestris	Confusional state	3	4.31	1.35	13.78	4.31	1.35	13.79
Ephedra sinica	Tremor	13	11.74	6.52	21.15	11.76	6.52	21.2
Camellia siangensis	Tremor	17	3.75	2.3	6.11	3.76	2.31	6.13
Foeniculum vulgare	Tremor	5	3.76	1.53	9.25	3.77	1.53	9.28
Ephedra sp	Tremor	13	11.74	6.52	21.15	11.76	6.52	21.2
Hypericum perfoliatum	Tremor	12	6.3	3.49	11.38	6.31	3.49	11.41
Hypericum perforatum	Tremor	12	6.3	3.49	11.38	6.31	3.49	11.41
Althaea officinalis	Tremor	16	6.65	3.98	11.11	6.66	3.98	11.13
Zingiber officinale	Tremor	11	3.53	1.93	6.47	3.54	1.93	6.49
Salvia alba	Tremor	14	6.59	3.81	11.4	6.6	3.81	11.43
Salix alba	Tremor	14	6.59	3.81	11.4	6.6	3.81	11.43
Paullinia cupana	Tremor	7	4.09	1.91	8.77	4.09	1.91	8.77
Citrus aurantium	Tremor	13	3.48	1.99	6.07	3.49	2	6.1
Vaccinium myrtillus	Tremor	6	4.37	1.91	9.97	4.37	1.91	9.98
Cola acuminata	Tremor	9	11.5	5.67	23.3	11.52	5.68	23.36
Calea acuminata	Tremor	9	11.5	5.67	23.3	11.52	5.68	23.36
Medicago sativa	Tremor	5	3.2	1.31	7.84	3.2	1.3	7.85
Tribulus terrestris	Tremor	3	3.76	1.18	12.02	3.76	1.18	12.03
Attalea racemosa	Tremor	4	3.66	1.34	10.01	3.66	1.34	10.01
Serenoa repens	Tremor	5	3.49	1.42	8.57	3.49	1.42	8.58
Actaea cimicifuga	Tremor	4	3.66	1.34	10.01	3.66	1.34	10.01
Actaea racemosa	Tremor	4	3.66	1.34	10.01	3.66	1.34	10.01
Turnera diffusa	Tremor	3	7.82	2.37	25.83	7.82	2.37	25.84
Salvia purpurea	Tremor	3	14.52	4.17	50.52	14.52	4.17	50.54
Sabia purpurea	Tremor	3	14.52	4.17	50.52	14.52	4.17	50.54
Salix purpurea	Tremor	3	14.52	4.17	50.52	14.52	4.17	50.54
Lythrum salicaria	Tremor	3	14.52	4.17	50.52	14.52	4.17	50.54
Theobroma cacao	Tremor	4	4.52	1.64	12.43	4.52	1.64	12.44
Ilex paraguariensis	Tremor	6	6.16	2.67	14.2	6.16	2.67	14.21
Valeriana officinalis	Tremor	4	3.01	1.11	8.19	3.01	1.11	8.2
Lepidium meyenii	Tremor	6	4.11	1.8	9.37	4.11	1.8	9.37
Passiflora incarnata	Tremor	5	3.94	1.6	9.7	3.94	1.6	9.71
Vitex agnus-castus	Tremor	3	4.96	1.54	16.01	4.96	1.54	16.02
Scutellaria lateriflora	Tremor	3	8.47	2.55	28.12	8.47	2.55	28.13
Chlorella vulgaris	Tremor	4	6.77	2.42	18.92	6.78	2.43	18.95
Chlorella pyrenoidosa	Tremor	4	6.77	2.42	18.92	6.78	2.43	18.95
Chlorella sp	Tremor	4	6.77	2.42	18.92	6.78	2.43	18.95
Malus domestica	Tremor	4	3.23	1.18	8.8	3.23	1.18	8.81
Lycium barbarum	Tremor	3	3.33	1.05	10.61	3.33	1.04	10.62
Olea europaea	Tremor	3	3.33	1.05	10.61	3.33	1.04	10.62
Coffea canephora	Tremor	3	4.42	1.37	14.21	4.42	1.37	14.21
Atropa belladonna	Dry mouth	5	3.76	1.55	9.12	3.76	1.55	9.13
Citrus aurantium	Dry mouth	6	3.89	1.73	8.73	3.89	1.73	8.75
Citrus reticulata	Dry mouth	4	4.92	1.82	13.29	4.92	1.82	13.3
Citrus nobilis	Dry mouth	4	5.07	1.88	13.7	5.07	1.87	13.72
Strychnos toxifera	Flushing	3	6.37	1.97	20.63	6.37	1.97	20.64
Astragalus membranaceus	Flushing	4	4.74	1.73	12.99	4.75	1.73	13.02
Curcuma zanthorrhiza	Flushing	3	4.32	1.35	13.8	4.32	1.35	13.8
Curcuma xanthorrhiza	Flushing	3	4.32	1.35	13.8	4.32	1.35	13.8
Triticum aestivum	Erythema	5	3.09	1.25	7.65	3.09	1.25	7.65
Carthamus tinctorius	Erythema	5	3.85	1.54	9.6	3.85	1.54	9.61
Ambrosia artemisiifolia	Erythema	4	5.16	1.83	14.54	5.16	1.83	14.54
Rosmarinus officinalis	Erythema	4	5.85	2.06	16.6	5.85	2.06	16.61
Melaleuca alternifolia	Erythema	6	3.7	1.61	8.51	3.71	1.61	8.54
Melaleuca lutea	Erythema	6	4.78	2.06	11.1	4.78	2.06	11.1
Juniperus communis	Erythema	4	3.08	1.12	8.49	3.08	1.12	8.49
Malus sp	Erythema	3	3.65	1.12	11.85	3.65	1.12	11.85
Strychnos toxifera	Hypotension	7	14.01	6.21	31.59	14.02	6.21	31.64
Ambrosia artemisiifolia	Hypotension	3	5.83	1.79	18.95	5.83	1.79	18.96
Ananas comosus	Malaise	10	4.58	2.38	8.81	4.59	2.39	8.83
Cola acuminata	Malaise	5	3.54	1.42	8.83	3.54	1.42	8.83
Calea acuminata	Malaise	5	3.54	1.42	8.83	3.54	1.42	8.83
Brassica oleracea	Malaise	7	6.01	2.72	13.29	6.01	2.72	13.3
Piper nigrum	Malaise	6	5.15	2.2	12.04	5.15	2.2	12.05
Garcinia gummi-gutta	Malaise	7	3.48	1.61	7.53	3.49	1.61	7.56
Theobroma cacao	Malaise	10	7.47	3.81	14.66	7.47	3.8	14.67
Camellia siangensis	Malaise	23	3.08	2.02	4.7	3.09	2.02	4.72
Ilex paraguariensis	Malaise	12	8.07	4.34	14.99	8.07	4.34	15
Vaccinium myrtillus	Malaise	7	3.07	1.42	6.62	3.07	1.42	6.62
Medicago sativa	Malaise	11	4.44	2.38	8.27	4.44	2.38	8.28
Oryza sativa	Malaise	7	4.09	1.88	8.9	4.09	1.88	8.9
Commiphora wightii	Malaise	6	9.31	3.83	22.62	9.31	3.83	22.62
Lepidium meyenii	Malaise	9	3.78	1.91	7.48	3.78	1.91	7.49
Paullinia cupana	Malaise	9	3.18	1.61	6.27	3.19	1.62	6.29
Cichorium intybus	Malaise	3	8.64	2.48	30.06	8.64	2.48	30.07
Vitex agnus-castus	Malaise	4	4.03	1.44	11.26	4.03	1.44	11.27
Angelica sinensis	Malaise	3	3.27	1.01	10.6	3.27	1.01	10.61
Passiflora incarnata	Malaise	8	3.89	1.88	8.03	3.89	1.88	8.04
Morus alba	Malaise	5	20.16	6.89	58.97	20.17	6.89	59.02
Eurycoma longifolia	Malaise	3	30.24	6.77	135.1	30.25	6.77	135.18
Acacia senegal	Malaise	3	7.12	2.09	24.29	7.12	2.09	24.3
Dioscorea composita	Malaise	3	3.9	1.19	12.76	3.9	1.19	12.76
Euterpe oleracea	Malaise	6	8.34	3.46	20.08	8.35	3.47	20.12
Plectranthus barbatus	Malaise	4	5.56	1.95	15.81	5.56	1.95	15.82
Malpighia glabra	Malaise	3	4.32	1.31	14.21	4.32	1.31	14.21
Chlorella vulgaris	Malaise	7	7.63	3.4	17.11	7.63	3.4	17.12
Chlorella pyrenoidosa	Malaise	7	7.63	3.4	17.11	7.63	3.4	17.12
Chlorella sp	Malaise	7	7.63	3.4	17.11	7.63	3.4	17.12
Coffea canephora	Malaise	5	4.58	1.82	11.55	4.58	1.82	11.55
Cola nitida	Malaise	6	4.17	1.8	9.66	4.17	1.8	9.67
Spinacia oleracea	Malaise	5	8.77	3.33	23.06	8.77	3.33	23.07
Garcinia mangostana	Malaise	5	9.16	3.47	24.19	9.17	3.47	24.22
Punica granatum	Malaise	5	3.2	1.29	7.95	3.2	1.29	7.96
Lycium barbarum	Malaise	5	3.42	1.37	8.52	3.42	1.37	8.52
Salvia hispanica	Malaise	4	7.01	2.42	20.27	7.01	2.42	20.27
Aristotelia chilensis	Malaise	4	13.44	4.34	41.67	13.45	4.34	41.71
Cinnamomum camphora	Skin burning sensation	3	84.87	25.61	281.28	85.19	25.6	283.48
Capsicum annuum	Skin burning sensation	5	16.17	6.68	39.15	16.26	6.68	39.58
Capsicum frutescens	Skin burning sensation	5	16.17	6.68	39.15	16.26	6.68	39.58
Eucalyptus globulus	Skin burning sensation	3	16.43	5.24	51.53	16.48	5.23	51.91
Plantago asiatica	Tongue oedema	10	3.4	1.83	6.31	3.43	1.84	6.41
Valeriana officinalis	Vision blurred	3	4.05	1.28	12.79	4.05	1.28	12.8
Hypericum perfoliatum	Alanine aminotransferase increased	3	4.41	1.41	13.83	4.41	1.4	13.85
Hypericum perforatum	Alanine aminotransferase increased	3	4.41	1.41	13.83	4.41	1.4	13.85
Peumus boldus	Alanine aminotransferase increased	3	38.03	11.09	130.44	38.07	11.09	130.73
Cynara scolymus	Alanine aminotransferase increased	4	13.99	5.08	38.51	14.01	5.08	38.62
Taraxacum officinale	Alanine aminotransferase increased	3	5.74	1.82	18.07	5.75	1.82	18.13
Ginkgo biloba	Alanine aminotransferase increased	6	5.43	2.42	12.21	5.44	2.42	12.25
Silybum marianum	Alanine aminotransferase increased	8	7.8	3.85	15.79	7.82	3.86	15.86
Zingiber officinale	Alanine aminotransferase increased	5	4.67	1.93	11.32	4.68	1.93	11.37
Salvia alba	Alanine aminotransferase increased	3	3.93	1.25	12.31	3.93	1.25	12.33
Salix alba	Alanine aminotransferase increased	3	3.93	1.25	12.31	3.93	1.25	12.33
Citrus aurantium	Alanine aminotransferase increased	4	3.1	1.16	8.32	3.1	1.15	8.33
Medicago sativa	Alanine aminotransferase increased	3	5.63	1.79	17.72	5.64	1.79	17.77
Curcuma longa	Alanine aminotransferase increased	5	6.72	2.76	16.37	6.73	2.76	16.42
Curcuma zanthorrhiza	Alanine aminotransferase increased	3	10.86	3.4	34.67	10.88	3.4	34.78
Curcuma xanthorrhiza	Alanine aminotransferase increased	3	10.86	3.4	34.67	10.88	3.4	34.78
Panax ginseng	Alanine aminotransferase increased	7	3.47	1.65	7.32	3.48	1.65	7.35
Cynara cardunculus	Alanine aminotransferase increased	4	13.99	5.08	38.51	14.01	5.08	38.62
Attalea racemosa	Alanine aminotransferase increased	4	10.96	4.01	29.95	10.98	4.01	30.05
Actaea cimicifuga	Alanine aminotransferase increased	4	10.96	4.01	29.95	10.98	4.01	30.05
Actaea racemosa	Alanine aminotransferase increased	4	10.96	4.01	29.95	10.98	4.01	30.05
Carthamus tinctorius	Alanine aminotransferase increased	3	10.31	3.23	32.87	10.32	3.23	32.94
Glycine soja	Alanine aminotransferase increased	3	4.44	1.42	13.93	4.44	1.41	13.95
Panax quinquefolius	Alanine aminotransferase increased	4	4.08	1.52	10.97	4.08	1.52	10.99
Glycyrrhiza glabra	Alanine aminotransferase increased	4	5.17	1.92	13.94	5.17	1.92	13.96
Ananas comosus	Aspartate aminotransferase increased	3	6.38	2.02	20.12	6.38	2.02	20.15
Curcuma longa	Aspartate aminotransferase increased	6	8.08	3.58	18.26	8.09	3.57	18.31
Hypericum perfoliatum	Aspartate aminotransferase increased	3	4.39	1.4	13.77	4.39	1.4	13.79
Hypericum perforatum	Aspartate aminotransferase increased	3	4.39	1.4	13.77	4.39	1.4	13.79
Oenothera biennis	Aspartate aminotransferase increased	3	5.56	1.77	17.5	5.56	1.76	17.52
Peumus boldus	Aspartate aminotransferase increased	3	37.87	11.04	129.89	37.91	11.04	130.18
Cynara scolymus	Aspartate aminotransferase increased	4	13.93	5.06	38.34	13.95	5.06	38.45
Taraxacum officinale	Aspartate aminotransferase increased	4	7.69	2.84	20.86	7.7	2.83	20.91
Ginkgo biloba	Aspartate aminotransferase increased	5	4.49	1.85	10.88	4.49	1.85	10.9
Silybum marianum	Aspartate aminotransferase increased	9	8.78	4.51	17.09	8.81	4.52	17.19
Zingiber officinale	Aspartate aminotransferase increased	5	4.65	1.92	11.28	4.66	1.92	11.32
Salvia alba	Aspartate aminotransferase increased	3	3.91	1.25	12.25	3.91	1.25	12.26
Salix alba	Aspartate aminotransferase increased	3	3.91	1.25	12.25	3.91	1.25	12.26
Citrus aurantium	Aspartate aminotransferase increased	4	3.08	1.15	8.26	3.09	1.15	8.3
Astragalus membranaceus	Aspartate aminotransferase increased	3	8.78	2.77	27.88	8.79	2.77	27.94
Medicago sativa	Aspartate aminotransferase increased	3	5.61	1.78	17.66	5.62	1.78	17.71
Curcuma zanthorrhiza	Aspartate aminotransferase increased	3	10.82	3.39	34.55	10.83	3.39	34.62
Curcuma xanthorrhiza	Aspartate aminotransferase increased	3	10.82	3.39	34.55	10.83	3.39	34.62
Cynara cardunculus	Aspartate aminotransferase increased	4	13.93	5.06	38.34	13.95	5.06	38.45
Taraxacum sp	Aspartate aminotransferase increased	3	6.31	2	19.9	6.32	2	19.96
Attalea racemosa	Aspartate aminotransferase increased	5	13.83	5.59	34.2	13.86	5.6	34.32
Actaea cimicifuga	Aspartate aminotransferase increased	5	13.83	5.59	34.2	13.86	5.6	34.32
Actaea racemosa	Aspartate aminotransferase increased	5	13.83	5.59	34.2	13.86	5.6	34.32
Serenoa repens	Aspartate aminotransferase increased	3	6.12	1.94	19.29	6.13	1.94	19.35
Carthamus tinctorius	Aspartate aminotransferase increased	3	10.27	3.22	32.74	10.28	3.22	32.81
Glycine soja	Aspartate aminotransferase increased	3	4.42	1.41	13.87	4.43	1.41	13.91
Althaea officinalis	Aspartate aminotransferase increased	4	4.62	1.72	12.44	4.62	1.71	12.46
Rhodiola rosea	Aspartate aminotransferase increased	4	9.62	3.53	26.21	9.63	3.53	26.28
Sedum griseum	Aspartate aminotransferase increased	3	7.57	2.39	23.96	7.58	2.39	24.02
Plantago asiatica	Bronchospasm	38	8.15	5.94	11.19	8.35	6.03	11.56
Citrus aurantium	Rash papular	4	8.53	3.18	22.85	8.56	3.18	23.02
Citrus sinensis	Rash papular	3	33.51	10.47	107.25	33.61	10.47	107.94
Citrus reticulata	Rash papular	4	16.31	6.05	43.99	16.37	6.05	44.33
Citrus nobilis	Rash papular	4	16.8	6.23	45.33	16.86	6.22	45.68
Abies balsamea	Dyspnoea	7	3.23	1.47	7.1	3.23	1.47	7.11
Juglans nigra	Dyspnoea	3	4.58	1.33	15.72	4.58	1.33	15.72
Salvia purpurea	Dyspnoea	3	5.23	1.5	18.2	5.24	1.51	18.24
Sabia purpurea	Dyspnoea	3	5.23	1.5	18.2	5.24	1.51	18.24
Salix purpurea	Dyspnoea	3	5.23	1.5	18.2	5.24	1.51	18.24
Garcinia gummi-gutta	Dyspnoea	10	3.13	1.62	6.04	3.13	1.62	6.05
Lythrum salicaria	Dyspnoea	3	5.23	1.5	18.2	5.24	1.51	18.24
Leonurus cardiaca	Dyspnoea	4	12.21	3.68	40.55	12.22	3.68	40.59
Gymnema sylvestre	Dyspnoea	6	3.49	1.48	8.21	3.49	1.48	8.21
Plectranthus barbatus	Dyspnoea	5	4.36	1.68	11.29	4.36	1.68	11.29
Achillea millefolium	Dyspnoea	5	4.21	1.63	10.87	4.21	1.63	10.88
Echinacea purpurea	Dyspnoea	4	4.07	1.41	11.73	4.07	1.41	11.73
Saccharum officinarum	Dyspnoea	3	4.58	1.33	15.72	4.58	1.33	15.72
Aconitum napellus	Dyspnoea	3	3.86	1.14	13.04	3.86	1.14	13.05
Crataegus rhipidophylla	Dyspnoea	6	3.86	1.63	9.13	3.86	1.63	9.13
Dactylis glomerata	Dyspnoea	3	4.89	1.42	16.89	4.89	1.42	16.89
Phleum pratense	Dyspnoea	4	4.25	1.47	12.29	4.25	1.47	12.29
Digitaria purpurea	Tachycardia	5	6.05	2.46	14.87	6.06	2.46	14.91
Digitalis purpurea	Tachycardia	5	6.05	2.46	14.87	6.06	2.46	14.91
Strychnos toxifera	Tachycardia	4	12.04	4.29	33.77	12.05	4.29	33.82
Glycine soja	Tachycardia	7	5.86	2.74	12.52	5.87	2.74	12.56
Carthamus tinctorius	Tachycardia	3	5.66	1.77	18.05	5.67	1.78	18.09
Hypericum perfoliatum	Tachycardia	6	4.95	2.19	11.21	4.96	2.19	11.24
Hypericum perforatum	Tachycardia	6	4.95	2.19	11.21	4.96	2.19	11.24
Ephedra sinica	Tachycardia	11	15.91	8.46	29.91	15.95	8.47	30.02
Salvia alba	Tachycardia	14	10.83	6.26	18.73	10.86	6.27	18.81
Salix alba	Tachycardia	14	10.83	6.26	18.73	10.86	6.27	18.81
Cola acuminata	Tachycardia	9	18.91	9.33	38.31	18.95	9.34	38.44
Calea acuminata	Tachycardia	9	18.91	9.33	38.31	18.95	9.34	38.44
Ephedra sp	Tachycardia	11	15.91	8.46	29.91	15.95	8.47	30.02
Paullinia cupana	Tachycardia	8	7.75	3.79	15.86	7.76	3.79	15.9
Capsicum annuum	Tachycardia	7	3.75	1.77	7.96	3.75	1.76	7.97
Zingiber officinale	Tachycardia	12	6.36	3.56	11.37	6.38	3.56	11.42
Citrus aurantium	Tachycardia	7	3.01	1.42	6.37	3.01	1.42	6.38
Sida cordifolia	Tachycardia	4	44.55	13.98	142	44.59	13.98	142.22
Capsicum baccatum	Tachycardia	7	3.75	1.77	7.96	3.75	1.76	7.97
Capsicum frutescens	Tachycardia	7	3.75	1.77	7.96	3.75	1.76	7.97
Theobroma cacao	Tachycardia	6	11.52	4.97	26.69	11.54	4.98	26.76
Camellia siangensis	Tachycardia	12	4.28	2.41	7.61	4.29	2.41	7.64
Camellia sinensis	Tachycardia	15	3.98	2.38	6.66	3.99	2.38	6.68
Ilex paraguariensis	Tachycardia	8	13.92	6.68	29.01	13.94	6.68	29.09
Phaseolus vulgaris	Tachycardia	3	10.13	3.11	33.02	10.13	3.11	33.04
Althaea officinalis	Tachycardia	15	10.19	6.01	17.28	10.22	6.02	17.35
Taraxacum officinale	Tachycardia	3	3.15	1	9.92	3.15	1	9.93
Taraxacum sp	Tachycardia	3	3.48	1.1	10.98	3.48	1.1	10.99
Piper nigrum	Tachycardia	3	6.68	2.08	21.41	6.69	2.09	21.46
Valeriana officinalis	Tachycardia	3	3.67	1.16	11.59	3.67	1.16	11.6
Nepeta cataria	Tachycardia	3	22.28	6.45	76.94	22.29	6.45	77.02
Nicotiana tabacum	Vertigo	3	7.15	2.28	22.46	7.16	2.28	22.53
Salvia alba	Vertigo	3	5.68	1.81	17.79	5.68	1.81	17.82
Salix alba	Vertigo	3	5.68	1.81	17.79	5.68	1.81	17.82
Garcinia gummi-gutta	Vertigo	3	10.35	3.28	32.7	10.36	3.27	32.79
Ananas comosus	Vertigo	3	9.26	2.94	29.2	9.27	2.93	29.28
Silybum marianum	Vertigo	3	4.13	1.32	12.9	4.13	1.32	12.92
Valeriana officinalis	Lethargy	4	10.19	3.75	27.72	10.2	3.74	27.79
Panax quinquefolius	Lethargy	4	4.61	1.71	12.39	4.61	1.71	12.41
Humulus lupulus	Lethargy	3	20.23	6.22	65.82	20.25	6.22	65.98
Silybum marianum	Lethargy	5	5.43	2.24	13.17	5.44	2.24	13.22
Passiflora incarnata	Lethargy	3	7.81	2.47	24.67	7.82	2.47	24.73
Glycyrrhiza glabra	Lethargy	3	4.35	1.39	13.62	4.36	1.39	13.67
Panax ginseng	Lethargy	6	3.35	1.5	7.49	3.36	1.5	7.53
Eleutherococcus senticosus	Lethargy	4	4.52	1.68	12.15	4.52	1.68	12.17
Cynara cardunculus	Abdominal pain	9	6.44	3.18	13.05	6.45	3.18	13.08
Aloe africana	Abdominal pain	7	3.45	1.59	7.48	3.45	1.59	7.48
Aloe bargalensis	Abdominal pain	8	3.2	1.56	6.58	3.2	1.55	6.59
Aloe succotrina	Abdominal pain	10	4.36	2.27	8.39	4.36	2.27	8.39
Aloe vallaris	Abdominal pain	7	3.45	1.59	7.48	3.45	1.59	7.48
Aloe vera	Abdominal pain	11	3.98	2.14	7.41	3.98	2.14	7.41
Carapichea ipecacuanha	Abdominal pain	4	5.42	1.9	15.45	5.42	1.9	15.45
Bryonia alba	Abdominal pain	3	4.74	1.43	15.74	4.74	1.43	15.74
Citrullus lanatus	Abdominal pain	3	14.23	3.78	53.63	14.23	3.77	53.64
Mentha spicata	Abdominal pain	4	3.61	1.29	10.07	3.61	1.29	10.07
Syzygium aromaticum	Abdominal pain	5	3.87	1.54	9.71	3.87	1.54	9.71
Berberis vulgaris	Abdominal pain	3	5.42	1.62	18.17	5.42	1.62	18.17
Citrus grandis	Abdominal pain	11	3.07	1.66	5.67	3.07	1.66	5.68
Foeniculum vulgare	Abdominal pain	7	3.02	1.4	6.52	3.02	1.4	6.52
Harpagophytum procumbens	Abdominal pain	5	4.12	1.64	10.37	4.13	1.64	10.4
Cynara scolymus	Abdominal pain	9	6.44	3.18	13.05	6.45	3.18	13.08
Medicago sativa	Abdominal pain	13	5.03	2.82	8.97	5.04	2.83	8.99
Glycyrrhiza uralensis	Abdominal pain	3	6.32	1.86	21.45	6.33	1.86	21.49
Scutellaria baicalensis	Abdominal pain	4	30.36	8.15	113.05	30.37	8.15	113.11
Sambucus canadensis	Abdominal pain	4	6.6	2.28	19.08	6.6	2.28	19.09
Sambucus nigra	Abdominal pain	4	6.6	2.28	19.08	6.6	2.28	19.09
Angelica sinensis	Abdominal pain	4	4.22	1.5	11.85	4.22	1.5	11.86
Gentiana lutea	Abdominal pain	3	9.49	2.68	33.63	9.49	2.68	33.63
Theobroma cacao	Abdominal pain	7	4.66	2.13	10.21	4.66	2.13	10.22
Lepidium meyenii	Abdominal pain	16	6.82	4.01	11.61	6.83	4.01	11.63
Piper nigrum	Abdominal pain	5	3.95	1.57	9.92	3.95	1.57	9.92
Turnera diffusa	Abdominal pain	3	4.38	1.33	14.47	4.38	1.33	14.47
Ananas comosus	Abdominal pain	11	4.8	2.56	8.99	4.8	2.56	8.99
Plectranthus barbatus	Abdominal pain	3	3.79	1.16	12.42	3.8	1.16	12.45
Origanum vulgare	Abdominal pain	6	4.65	1.99	10.85	4.65	1.99	10.86
Coffea arabica	Abdominal pain	5	5.27	2.07	13.43	5.27	2.07	13.43
Gymnema sylvestre	Abdominal pain	5	4.41	1.75	11.13	4.41	1.75	11.14
Uncaria tomentosa	Abdominal pain	4	7.59	2.59	22.2	7.59	2.59	22.21
Azadirachta indica	Abdominal pain	3	9.49	2.68	33.63	9.49	2.68	33.63
Phyllanthus emblica	Abdominal pain	5	4.22	1.68	10.63	4.22	1.67	10.63
Tribulus terrestris	Abdominal pain	5	3.65	1.46	9.14	3.65	1.46	9.14
Terminalia chebula	Abdominal pain	4	3.37	1.21	9.37	3.37	1.21	9.37
Terminalia bellirica	Abdominal pain	4	3.23	1.16	8.96	3.23	1.16	8.97
Lycium chinense	Abdominal pain	12	7.34	3.96	13.62	7.35	3.96	13.64
Dioscorea composita	Abdominal pain	3	3.67	1.12	12	3.67	1.12	12.01
Euterpe oleracea	Abdominal pain	12	19.8	9.85	39.78	19.82	9.86	39.84
Terminalia catappa	Abdominal pain	5	4.12	1.64	10.37	4.13	1.64	10.4
Anethum graveolens	Abdominal pain	3	22.77	5.44	95.27	22.77	5.44	95.29
Brassica oleracea	Abdominal pain	10	8.62	4.34	17.12	8.63	4.34	17.15
Spinacia oleracea	Abdominal pain	10	21.08	9.73	45.66	21.1	9.74	45.72
Salvia hispanica	Abdominal pain	9	18.97	8.52	42.22	18.99	8.53	42.28
Aristotelia chilensis	Abdominal pain	7	29.52	11	79.26	29.53	11	79.3
Garcinia mangostana	Abdominal pain	10	22.32	10.22	48.74	22.34	10.23	48.8
Punica granatum	Abdominal pain	11	7.32	3.84	13.96	7.33	3.84	13.98
Lycium barbarum	Abdominal pain	11	7.88	4.12	15.08	7.88	4.12	15.09
Chlorella vulgaris	Abdominal pain	10	11.16	5.51	22.58	11.17	5.52	22.61
Chlorella pyrenoidosa	Abdominal pain	10	11.16	5.51	22.58	11.17	5.52	22.61
Chlorella sp	Abdominal pain	10	11.16	5.51	22.58	11.17	5.52	22.61
Coffea canephora	Abdominal pain	7	6.32	2.84	14.07	6.33	2.84	14.09
Angelica archangelica	Abdominal pain	3	6.32	1.86	21.45	6.33	1.86	21.49
Carica papaya	Abdominal pain	3	3.25	1	10.57	3.25	1	10.57
Ambrosia artemisiifolia	Anaphylactic reaction	5	33.52	13.1	85.79	33.59	13.1	86.11
Eucalyptus globulus	Anaphylactic reaction	3	5.35	1.7	16.8	5.36	1.7	16.86
Mentha piperita	Anaphylactic reaction	3	8.85	2.79	28.04	8.86	2.79	28.11
Dactylis glomerata	Anaphylactic reaction	3	44.25	12.82	152.75	44.31	12.82	153.16
Phleum pratense	Anaphylactic reaction	6	63.22	25.54	156.5	63.37	25.55	157.15
Poa pratensis	Anaphylactic reaction	3	55.32	15.62	195.92	55.38	15.62	196.37
Astragalus membranaceus	Oedema peripheral	3	4.76	1.5	15.12	4.77	1.5	15.16
Matricaria chamomilla	Oedema peripheral	3	4.33	1.37	13.72	4.33	1.37	13.73
Aloe bargalensis	Oedema peripheral	3	3.29	1.04	10.37	3.29	1.04	10.38
Passiflora incarnata	Oedema peripheral	3	3.74	1.18	11.82	3.74	1.18	11.82
Glycine soja	Pallor	3	4.79	1.53	15.03	4.79	1.52	15.05
Myroxylon balsamum	Dermatitis	6	17.43	7.72	39.33	17.51	7.73	39.66
Solanum dulcamara	Dermatitis	3	5.8	1.86	18.09	5.81	1.86	18.17
Ephedra sinica	Myocardial infarction	3	3.97	1.26	12.55	3.97	1.25	12.56
Ephedra sp	Myocardial infarction	3	3.97	1.26	12.55	3.97	1.25	12.56
Vaccinium myrtillus	Myocardial infarction	3	3.51	1.11	11.07	3.51	1.11	11.08
Vitis vinifera	Myocardial infarction	234	4.89	4.3	5.56	5.09	4.45	5.82
Cannabis sativa	Coordination abnormal	4	4.67	1.76	12.42	4.7	1.75	12.6
Ephedra sinica	Hyperhidrosis	8	7.54	3.65	15.59	7.55	3.65	15.62
Foeniculum vulgare	Hyperhidrosis	4	3.31	1.22	9.01	3.32	1.22	9.04
Ephedra sp	Hyperhidrosis	8	7.54	3.65	15.59	7.55	3.65	15.62
Salvia alba	Hyperhidrosis	10	5.09	2.68	9.65	5.1	2.69	9.68
Salix alba	Hyperhidrosis	10	5.09	2.68	9.65	5.1	2.69	9.68
Cola acuminata	Hyperhidrosis	7	9.6	4.37	21.07	9.61	4.38	21.11
Calea acuminata	Hyperhidrosis	7	9.6	4.37	21.07	9.61	4.38	21.11
Hypericum perfoliatum	Hyperhidrosis	6	3.35	1.48	7.59	3.35	1.48	7.59
Hypericum perforatum	Hyperhidrosis	6	3.35	1.48	7.59	3.35	1.48	7.59
Vaccinium macrocarpon	Hyperhidrosis	9	3.13	1.61	6.09	3.13	1.61	6.1
Beta vulgaris	Hyperhidrosis	3	6.28	1.93	20.39	6.29	1.94	20.43
Paullinia cupana	Hyperhidrosis	11	7.41	3.99	13.76	7.42	3.99	13.79
Turnera diffusa	Hyperhidrosis	3	8.7	2.63	28.74	8.7	2.63	28.75
Citrus aurantium	Hyperhidrosis	11	3.25	1.78	5.94	3.26	1.78	5.96
Lepidium meyenii	Hyperhidrosis	5	3.77	1.54	9.25	3.77	1.54	9.26
Piper nigrum	Hyperhidrosis	4	6.16	2.22	17.06	6.16	2.22	17.07
Theobroma cacao	Hyperhidrosis	4	5.03	1.83	13.84	5.03	1.83	13.84
Humulus lupulus	Hyperhidrosis	3	6.65	2.04	21.65	6.66	2.05	21.69
Rumex crispus	Hyperhidrosis	3	6.46	1.99	21	6.47	1.99	21.04
Rumex crassus	Hyperhidrosis	3	6.46	1.99	21	6.47	1.99	21.04
Medicago sativa	Hyperhidrosis	6	4.31	1.89	9.81	4.31	1.89	9.82
Passiflora incarnata	Hyperhidrosis	4	3.47	1.27	9.45	3.47	1.27	9.46
Matricaria chamomilla	Hyperhidrosis	4	4.02	1.47	10.99	4.02	1.47	10.99
Oryza sativa	Hyperhidrosis	5	5.31	2.14	13.15	5.31	2.14	13.15
Chlorella vulgaris	Hyperhidrosis	4	7.54	2.7	21.07	7.54	2.7	21.08
Chlorella pyrenoidosa	Hyperhidrosis	4	7.54	2.7	21.07	7.54	2.7	21.08
Chlorella sp	Hyperhidrosis	4	7.54	2.7	21.07	7.54	2.7	21.08
Malus domestica	Hyperhidrosis	8	7.54	3.65	15.59	7.55	3.65	15.62
Brassica oleracea	Hyperhidrosis	4	6.03	2.18	16.69	6.04	2.18	16.73
Spinacia oleracea	Hyperhidrosis	4	12.57	4.36	36.22	12.57	4.36	36.24
Euterpe oleracea	Hyperhidrosis	3	7.07	2.17	23.08	7.07	2.16	23.09
Garcinia mangostana	Hyperhidrosis	3	9.43	2.84	31.31	9.43	2.84	31.32
Punica granatum	Hyperhidrosis	3	3.48	1.09	11.07	3.48	1.09	11.08
Lycium barbarum	Hyperhidrosis	3	3.71	1.16	11.82	3.71	1.16	11.83
Hypericum perfoliatum	Balance disorder	5	9.29	3.81	22.66	9.31	3.81	22.75
Hypericum perforatum	Balance disorder	5	9.29	3.81	22.66	9.31	3.81	22.75
Valeriana officinalis	Balance disorder	3	8.33	2.64	26.29	8.35	2.64	26.39
Ginkgo biloba	Balance disorder	3	3.34	1.07	10.43	3.34	1.07	10.44
Equisetum arvense	Balance disorder	4	26.61	9.51	74.49	26.66	9.51	74.76
Arctostaphylos uva-ursi	Balance disorder	3	16.49	5.13	52.98	16.51	5.13	53.13
Arctium lappa	Balance disorder	3	8.43	2.67	26.61	8.44	2.67	26.68
Vaccinium macrocarpon	Balance disorder	9	10.49	5.39	20.41	10.53	5.4	20.54
Dimorphandra mollis	Balance disorder	3	24.47	7.49	79.98	24.5	7.48	80.2
Centella asiatica	Fatigue	3	3.77	1.13	12.59	3.77	1.13	12.6
Curcuma longa	Fatigue	17	3.38	2.04	5.59	3.39	2.05	5.61
Curcuma zanthorrhiza	Fatigue	7	3.72	1.69	8.19	3.72	1.69	8.19
Curcuma xanthorrhiza	Fatigue	7	3.72	1.69	8.19	3.72	1.69	8.19
Beta vulgaris	Fatigue	4	3.16	1.12	8.89	3.16	1.12	8.89
Piper methysticum	Fatigue	3	3.77	1.13	12.59	3.77	1.13	12.6
Rosmarinus officinalis	Fatigue	4	3.69	1.3	10.47	3.69	1.3	10.48
Brassica oleracea	Fatigue	6	3.46	1.48	8.08	3.46	1.48	8.09
Spinacia oleracea	Fatigue	3	3.32	1	11	3.32	1	11
Dioscorea villosa	Fatigue	5	4.94	1.91	12.79	4.94	1.91	12.8
Linum usitatissimum	Fatigue	25	3.44	2.27	5.21	3.44	2.27	5.21
Aconitum napellus	Fatigue	3	4.37	1.29	14.77	4.37	1.29	14.77
Achillea millefolium	Fatigue	4	3.69	1.3	10.47	3.69	1.3	10.48
Lycopodium clavatum	Fatigue	3	7.54	2.1	27.03	7.55	2.11	27.07
Equisetum hyemale	Fatigue	3	3.32	1	11	3.32	1	11
Berberis vulgaris	Fatigue	3	3.95	1.18	13.24	3.95	1.18	13.24
Urtica ardens	Fatigue	3	27.66	5.58	137.04	27.67	5.58	137.11
Urtica urens	Fatigue	3	27.66	5.58	137.04	27.67	5.58	137.11
Gentiana lutea	Fatigue	3	6.92	1.95	24.52	6.92	1.95	24.52
Saussurea costus	Fatigue	6	4.05	1.72	9.54	4.05	1.72	9.54
Attalea racemosa	Fatigue	9	3.61	1.8	7.23	3.61	1.8	7.23
Actaea cimicifuga	Fatigue	9	3.61	1.8	7.23	3.61	1.8	7.23
Actaea racemosa	Fatigue	9	3.61	1.8	7.23	3.61	1.8	7.23
Vitex agnus-castus	Fatigue	5	3.55	1.4	9.01	3.55	1.4	9.01
Hebanthe eriantha	Fatigue	6	11.07	4.3	28.53	11.07	4.29	28.53
Rubus idaeus	Fatigue	4	3.95	1.39	11.26	3.95	1.39	11.26
Fallopia multiflora	Fatigue	3	5.19	1.51	17.81	5.19	1.51	17.81
Melissa officinalis	Fatigue	4	3.07	1.09	8.62	3.07	1.09	8.63
Azadirachta indica	Fatigue	3	6.92	1.95	24.52	6.92	1.95	24.52
Commiphora wightii	Fatigue	5	5.12	1.97	13.29	5.12	1.97	13.3
Trigonella foenum-graecum	Fatigue	5	3.37	1.33	8.53	3.37	1.33	8.53
Ginkgo biloba	Tinnitus	3	4.11	1.32	12.83	4.11	1.31	12.85
Paullinia cupana	Decreased appetite	5	3.03	1.24	7.41	3.03	1.24	7.42
Ephedra sinica	Decreased appetite	7	6.17	2.85	13.35	6.18	2.85	13.38
Salvia alba	Decreased appetite	7	3.31	1.55	7.06	3.31	1.55	7.06
Salix alba	Decreased appetite	7	3.31	1.55	7.06	3.31	1.55	7.06
Citrus aurantium	Decreased appetite	11	3.08	1.69	5.63	3.08	1.68	5.63
Ephedra sp	Decreased appetite	7	6.17	2.85	13.35	6.18	2.85	13.38
Attalea racemosa	Decreased appetite	4	3.86	1.41	10.55	3.86	1.41	10.56
Actaea cimicifuga	Decreased appetite	4	3.86	1.41	10.55	3.86	1.41	10.56
Actaea racemosa	Decreased appetite	4	3.86	1.41	10.55	3.86	1.41	10.56
Althaea officinalis	Decreased appetite	8	3.34	1.64	6.78	3.34	1.64	6.79
Cola acuminata	Decreased appetite	3	3.63	1.14	11.58	3.63	1.14	11.58
Calea acuminata	Decreased appetite	3	3.63	1.14	11.58	3.63	1.14	11.58
Citrus reticulata	Decreased appetite	6	3.17	1.4	7.18	3.18	1.4	7.21
Citrus nobilis	Decreased appetite	6	3.27	1.44	7.41	3.27	1.44	7.41
Coffea canephora	Decreased appetite	3	4.66	1.45	14.98	4.66	1.45	14.99
Digitaria purpurea	Visual impairment	3	5.06	1.6	15.96	5.06	1.6	15.98
Digitalis purpurea	Visual impairment	3	5.06	1.6	15.96	5.06	1.6	15.98
Thymus vulgaris	Visual impairment	6	8.26	3.64	18.76	8.28	3.64	18.83
Curcuma longa	Visual impairment	6	6.34	2.81	14.33	6.35	2.81	14.37
Curcuma zanthorrhiza	Visual impairment	6	17.93	7.71	41.68	17.96	7.72	41.81
Cynara cardunculus	Visual impairment	3	8.05	2.52	25.67	8.06	2.53	25.72
Curcuma xanthorrhiza	Visual impairment	6	17.93	7.71	41.68	17.96	7.72	41.81
Ginkgo biloba	Visual impairment	6	4.24	1.89	9.53	4.25	1.89	9.57
Abies balsamea	Visual impairment	3	8.34	2.61	26.62	8.34	2.61	26.64
Cannabis sativa	Suicide attempt	11	5.37	2.97	9.7	5.41	2.98	9.83
Zingiber officinale	Suicide attempt	3	6.55	2.1	20.44	6.56	2.1	20.53
Salvia alba	Suicide attempt	6	18.87	8.36	42.58	18.97	8.37	42.98
Salix alba	Suicide attempt	6	18.87	8.36	42.58	18.97	8.37	42.98
Capsicum annuum	Suicide attempt	3	6.76	2.17	21.1	6.78	2.17	21.22
Camellia siangensis	Suicide attempt	3	4.47	1.44	13.91	4.48	1.44	13.99
Camellia sinensis	Suicide attempt	3	3.32	1.07	10.32	3.33	1.07	10.38
Valeriana officinalis	Suicide attempt	3	15.76	5	49.7	15.8	4.99	49.98
Serenoa repens	Headache	11	3.15	1.69	5.89	3.15	1.68	5.89
Coffea arabica	Headache	6	4.47	1.88	10.63	4.47	1.88	10.63
Hypericum perfoliatum	Headache	16	3.34	1.99	5.62	3.34	1.98	5.62
Hypericum perforatum	Headache	16	3.34	1.99	5.62	3.34	1.98	5.62
Aloe vera	Headache	12	3.01	1.66	5.47	3.01	1.66	5.47
Schizonepeta tenuifolia	Headache	3	6.52	1.84	23.1	6.52	1.84	23.11
Paullinia cupana	Headache	14	3.35	1.92	5.84	3.35	1.92	5.85
Ananas comosus	Headache	14	4.35	2.47	7.66	4.35	2.47	7.66
Curcuma zanthorrhiza	Headache	8	4.09	1.94	8.62	4.09	1.94	8.62
Boswellia serrata	Headache	5	3.03	1.2	7.65	3.03	1.2	7.65
Curcuma xanthorrhiza	Headache	8	4.09	1.94	8.62	4.09	1.94	8.62
Cola acuminata	Headache	7	3.32	1.51	7.29	3.32	1.51	7.29
Calea acuminata	Headache	7	3.32	1.51	7.29	3.32	1.51	7.29
Tribulus terrestris	Headache	7	3.65	1.66	8.05	3.65	1.65	8.05
Attalea racemosa	Headache	10	3.83	1.97	7.44	3.84	1.98	7.46
Actaea cimicifuga	Headache	10	3.83	1.97	7.44	3.84	1.98	7.46
Actaea racemosa	Headache	10	3.83	1.97	7.44	3.84	1.98	7.46
Petroselinum crispum	Headache	8	4.74	2.23	10.07	4.74	2.23	10.07
Plectranthus barbatus	Headache	4	3.6	1.27	10.24	3.6	1.27	10.24
Gymnema sylvestre	Headache	6	3.73	1.59	8.77	3.73	1.59	8.78
Aconitum napellus	Headache	3	4.12	1.22	13.92	4.12	1.22	13.92
Piper nigrum	Headache	6	3.33	1.42	7.79	3.33	1.42	7.79
Commiphora wightii	Headache	5	4.83	1.86	12.54	4.83	1.86	12.54
Theobroma cacao	Headache	11	5.41	2.83	10.36	5.41	2.83	10.36
Ilex paraguariensis	Headache	8	3.26	1.56	6.8	3.26	1.56	6.8
Lepidium meyenii	Headache	11	3.05	1.63	5.69	3.05	1.63	5.7
Rhamnus frangula	Headache	5	3.62	1.42	9.22	3.62	1.42	9.23
Opuntia streptacantha	Headache	3	11.18	2.89	43.23	11.18	2.89	43.24
Cinnamomum verum	Headache	12	4.41	2.39	8.13	4.41	2.39	8.13
Rhodiola rosea	Headache	11	3.73	1.98	7.01	3.73	1.98	7.02
Sedum griseum	Headache	9	3.17	1.59	6.33	3.17	1.59	6.33
Frangula alnus	Headache	5	3.62	1.42	9.22	3.62	1.42	9.23
Urtica dioica	Headache	4	4.17	1.45	11.98	4.17	1.45	11.98
Helianthus annuus	Headache	3	4.12	1.22	13.92	4.12	1.22	13.92
Saccharum officinarum	Headache	3	4.89	1.42	16.78	4.89	1.42	16.78
Euterpe oleracea	Headache	5	4.35	1.69	11.21	4.35	1.69	11.21
Epimedium brevicornu	Headache	4	34.77	7.78	155.35	34.78	7.78	155.41
Morus alba	Headache	5	13.04	4.46	38.15	13.04	4.46	38.15
Terminalia catappa	Headache	6	3.48	1.48	8.16	3.48	1.48	8.16
Mucuna pruriens	Headache	4	3.36	1.19	9.52	3.37	1.19	9.55
Lycium chinense	Headache	10	4.07	2.09	7.92	4.08	2.09	7.95
Lycium barbarum	Headache	8	3.73	1.78	7.82	3.73	1.78	7.83
Cinnamomum cassia	Headache	6	6.26	2.57	15.26	6.26	2.57	15.26
Cinnamomum aromaticum	Headache	6	6.26	2.57	15.26	6.26	2.57	15.26
Chlorella vulgaris	Headache	6	4.12	1.74	9.75	4.12	1.74	9.75
Chlorella pyrenoidosa	Headache	6	4.12	1.74	9.75	4.12	1.74	9.75
Chlorella sp	Headache	6	4.12	1.74	9.75	4.12	1.74	9.75
Hyssopus officinalis	Headache	4	3.73	1.31	10.63	3.73	1.31	10.64
Coffea canephora	Headache	7	4.35	1.95	9.68	4.35	1.95	9.68
Angelica archangelica	Headache	3	4.35	1.28	14.77	4.35	1.28	14.77
Acacia senegal	Headache	3	4.6	1.35	15.7	4.6	1.35	15.7
Rhododendron luteum	Headache	3	4.6	1.35	15.7	4.6	1.35	15.7
Rhododendron aureum	Headache	3	4.6	1.35	15.7	4.6	1.35	15.7
Glycine soja	Hyperglycaemia	7	16.13	7.55	34.44	16.19	7.56	34.67
Ephedra sinica	Anxiety	5	4.88	1.98	12.03	4.88	1.98	12.04
Camellia siangensis	Anxiety	16	4.21	2.55	6.95	4.22	2.55	6.98
Camellia sinensis	Anxiety	18	3.5	2.18	5.61	3.5	2.18	5.61
Calendula officinalis	Anxiety	8	21.61	9.91	47.12	21.63	9.91	47.2
Ephedra sp	Anxiety	5	4.88	1.98	12.03	4.88	1.98	12.04
Hypericum perfoliatum	Anxiety	16	10.37	6.17	17.44	10.39	6.17	17.49
Hypericum perforatum	Anxiety	16	10.37	6.17	17.44	10.39	6.17	17.49
Zingiber officinale	Anxiety	8	3.03	1.5	6.13	3.03	1.5	6.14
Salvia alba	Anxiety	9	4.89	2.5	9.58	4.9	2.5	9.61
Salix alba	Anxiety	9	4.89	2.5	9.58	4.9	2.5	9.61
Plectranthus barbatus	Anxiety	3	8.1	2.47	26.53	8.11	2.47	26.58
Citrus aurantium	Anxiety	12	3.83	2.15	6.83	3.83	2.15	6.84
Cola acuminata	Anxiety	3	4.12	1.29	13.14	4.12	1.29	13.15
Calea acuminata	Anxiety	3	4.12	1.29	13.14	4.12	1.29	13.15
Ilex paraguariensis	Anxiety	3	3.52	1.11	11.18	3.52	1.11	11.19
Garcinia gummi-gutta	Anxiety	6	5.93	2.59	13.58	5.93	2.59	13.59
Gymnema sylvestre	Anxiety	5	9.42	3.73	23.77	9.43	3.73	23.81
Schisandra chinensis	Anxiety	5	6.05	2.44	15.01	6.05	2.44	15.01
Schisandra sphenanthera	Anxiety	3	9	2.73	29.66	9.01	2.73	29.71
Astragalus membranaceus	Anxiety	4	4.77	1.74	13.07	4.77	1.74	13.08
Arabis vochinensis	Anxiety	3	5.93	1.84	19.15	5.93	1.84	19.15
Aralia chinensis	Anxiety	3	5.93	1.84	19.15	5.93	1.84	19.15
Acacia chiapensis	Anxiety	3	5.93	1.84	19.15	5.93	1.84	19.15
Aconitum balfourii	Anxiety	3	22.1	6.17	79.2	22.11	6.17	79.27
Aconitum napellus	Anxiety	4	18.01	6.1	53.2	18.02	6.1	53.26
Hamamelis virginiana	Anxiety	3	8.1	2.47	26.53	8.11	2.47	26.58
Symphytum officinale	Anxiety	3	18.7	5.33	65.61	18.71	5.33	65.67
Achillea millefolium	Anxiety	4	10.8	3.81	30.65	10.81	3.81	30.69
Tanacetum vulgare	Anxiety	3	18.7	5.33	65.61	18.71	5.33	65.67
Arnica montana	Anxiety	3	9	2.73	29.66	9.01	2.73	29.71
Attalea racemosa	Anxiety	3	3.24	1.02	10.27	3.24	1.02	10.28
Actaea racemosa	Anxiety	3	3.24	1.02	10.27	3.24	1.02	10.28
Ziziphus jujuba	Anxiety	4	19.06	6.42	56.63	19.08	6.42	56.72
Humulus lupulus	Anxiety	3	7.15	2.2	23.27	7.15	2.2	23.29
Valeriana officinalis	Anxiety	6	5.52	2.42	12.62	5.53	2.42	12.65
Cinnamomum verum	Anxiety	5	5.19	2.1	12.81	5.2	2.1	12.85
Rhodiola rosea	Anxiety	5	4.88	1.98	12.03	4.88	1.98	12.04
Sedum griseum	Anxiety	5	5.19	2.1	12.81	5.2	2.1	12.85
Actaea cimicifuga	Anxiety	3	3.24	1.02	10.27	3.24	1.02	10.28
Withania somnifera	Anxiety	6	4.5	1.98	10.23	4.5	1.98	10.24
Passiflora incarnata	Anxiety	6	5.72	2.5	13.09	5.72	2.5	13.1
Melissa officinalis	Anxiety	3	6.57	2.03	21.3	6.57	2.03	21.31
Scutellaria lateriflora	Anxiety	3	10.13	3.05	33.63	10.13	3.05	33.65
Coffea canephora	Anxiety	3	5.28	1.64	16.97	5.29	1.64	17.01
Hyssopus officinalis	Anxiety	3	8.38	2.55	27.5	8.39	2.56	27.55
Rumex crispus	Anxiety	3	6.94	2.13	22.56	6.95	2.14	22.6
Rumex crassus	Anxiety	3	6.94	2.13	22.56	6.95	2.14	22.6
Angelica archangelica	Anxiety	4	19.06	6.42	56.63	19.08	6.42	56.72
Robinia pseudoacacia	Anxiety	3	9	2.73	29.66	9.01	2.73	29.71
Aralia elata	Anxiety	3	5.93	1.84	19.15	5.93	1.84	19.15
Astragalus propinquus	Anxiety	4	4.77	1.74	13.07	4.77	1.74	13.08
Glycine soja	Tachypnoea	3	25.13	8.03	78.6	25.29	8.03	79.67
Silybum marianum	Blood alkaline phosphatase increased	3	5.57	1.78	17.39	5.58	1.78	17.46
Panax ginseng	Blood alkaline phosphatase increased	4	3.84	1.44	10.27	3.85	1.44	10.32
Attalea racemosa	Blood alkaline phosphatase increased	3	15.82	5	50.1	15.85	4.99	50.32
Actaea cimicifuga	Blood alkaline phosphatase increased	3	15.82	5	50.1	15.85	4.99	50.32
Actaea racemosa	Blood alkaline phosphatase increased	3	15.82	5	50.1	15.85	4.99	50.32
Ginkgo biloba	Hepatomegaly	3	20.31	6.53	63.14	20.48	6.52	64.29
Panax ginseng	Hepatomegaly	3	11.17	3.61	34.61	11.25	3.6	35.2
Panax quinquefolius	Hepatomegaly	3	23.06	7.41	71.76	23.25	7.4	73.05
Eleutherococcus senticosus	Hepatomegaly	3	22.6	7.26	70.32	22.79	7.25	71.6
Camellia siangensis	Hepatomegaly	3	14.37	4.63	44.58	14.48	4.62	45.35
Camellia sinensis	Hepatomegaly	3	10.67	3.44	33.05	10.76	3.44	33.66
Panax japonicus	Hepatomegaly	3	14.02	4.52	43.48	14.13	4.51	44.25
Panax notoginseng	Hepatomegaly	3	22.83	7.34	71.04	23.02	7.33	72.33
Carthamus tinctorius	Thrombocytopenia	4	11.86	4.31	32.65	11.87	4.31	32.72
Glycine soja	Thrombocytopenia	6	7.7	3.4	17.43	7.71	3.4	17.48
Ananas comosus	Thrombocytopenia	3	5.43	1.72	17.13	5.43	1.72	17.15
Aloe succotrina	Thrombocytopenia	3	5.49	1.74	17.32	5.49	1.74	17.34
Aloe vera	Thrombocytopenia	3	4.56	1.45	14.34	4.57	1.45	14.39
Salvia alba	Chest pain	12	5.76	3.2	10.37	5.76	3.2	10.38
Salix alba	Chest pain	12	5.76	3.2	10.37	5.76	3.2	10.38
Salvia purpurea	Chest pain	3	15.01	4.31	52.22	15.01	4.31	52.24
Ephedra sinica	Chest pain	10	8.98	4.65	17.34	8.99	4.65	17.37
Sabia purpurea	Chest pain	3	15.01	4.31	52.22	15.01	4.31	52.24
Salix purpurea	Chest pain	3	15.01	4.31	52.22	15.01	4.31	52.24
Garcinia gummi-gutta	Chest pain	9	7.98	4.01	15.9	7.99	4.01	15.93
Lythrum salicaria	Chest pain	3	15.01	4.31	52.22	15.01	4.31	52.24
Paullinia cupana	Chest pain	7	4.23	1.97	9.07	4.23	1.97	9.07
Ephedra sp	Chest pain	10	8.98	4.65	17.34	8.99	4.65	17.37
Panax ginseng	Chest pain	19	3.35	2.12	5.31	3.36	2.12	5.33
Zingiber officinale	Chest pain	12	4	2.24	7.15	4.01	2.24	7.18
Citrus aurantium	Chest pain	13	3.6	2.06	6.28	3.6	2.06	6.29
Ilex paraguariensis	Chest pain	7	7.54	3.46	16.44	7.55	3.46	16.47
Astragalus membranaceus	Chest pain	5	5.23	2.11	12.97	5.23	2.11	12.98
Cola acuminata	Chest pain	6	7.5	3.23	17.4	7.51	3.23	17.44
Calea acuminata	Chest pain	6	7.5	3.23	17.4	7.51	3.23	17.44
Panax quinquefolius	Chest pain	10	3.63	1.92	6.85	3.63	1.92	6.86
Aloe succotrina	Chest pain	4	3.01	1.11	8.19	3.01	1.11	8.19
Petroselinum crispum	Chest pain	3	4.29	1.34	13.76	4.29	1.34	13.77
Gymnema sylvestre	Chest pain	4	6.37	2.29	17.72	6.37	2.29	17.73
Coffea arabica	Chest pain	4	7.57	2.7	21.23	7.57	2.7	21.24
Cynara cardunculus	Chest pain	3	3.56	1.12	11.35	3.56	1.12	11.36
Curcuma longa	Chest pain	8	3.79	1.86	7.72	3.79	1.86	7.72
Coffea canephora	Chest pain	3	4.57	1.42	14.69	4.57	1.42	14.7
Citrus reticulata	Chest pain	8	4.21	2.06	8.59	4.22	2.07	8.62
Borago officinalis	Hypoaesthesia	10	4.01	2.13	7.55	4.02	2.13	7.57
Serenoa repens	Hypoaesthesia	4	3.8	1.4	10.32	3.8	1.4	10.33
Allium salinum	Hypoaesthesia	15	5.25	3.12	8.83	5.26	3.12	8.85
Allium sativum	Hypoaesthesia	15	4.99	2.97	8.38	5	2.97	8.41
Piper methysticum	Hypoaesthesia	3	12.69	3.8	42.39	12.7	3.8	42.44
Arctostaphylos uva-ursi	Hypoaesthesia	3	6.07	1.89	19.51	6.07	1.89	19.52
Astragalus membranaceus	Hypoaesthesia	4	5.48	2	15.02	5.48	2	15.03
Zingiber officinale	Hypoaesthesia	7	3.03	1.43	6.43	3.03	1.43	6.44
Paullinia cupana	Hypoaesthesia	5	3.94	1.61	9.64	3.95	1.61	9.67
Humulus lupulus	Hypoaesthesia	3	8.21	2.52	26.72	8.22	2.52	26.77
Althaea officinalis	Hypoaesthesia	6	3.23	1.43	7.29	3.23	1.43	7.29
Rhodiola rosea	Hypoaesthesia	3	3.29	1.04	10.4	3.29	1.04	10.41
Sedum griseum	Hypoaesthesia	3	3.49	1.1	11.05	3.49	1.1	11.05
Echinacea angustifolia	Hypoaesthesia	8	3.6	1.78	7.29	3.6	1.78	7.3
Vaccinium macrocarpon	Orthostatic hypotension	7	28.03	13.26	59.24	28.34	13.3	60.4
Glycine soja	Sepsis	4	7.52	2.78	20.31	7.53	2.78	20.37
Plantago asiatica	Conjunctivitis	19	3.83	2.44	6	3.87	2.46	6.1
Glycine soja	Heart rate increased	6	5.12	2.26	11.59	5.12	2.26	11.61
Zingiber officinale	Heart rate increased	12	6.53	3.65	11.67	6.55	3.66	11.73
Salvia alba	Heart rate increased	13	10.25	5.82	18.07	10.28	5.82	18.14
Salix alba	Heart rate increased	13	10.25	5.82	18.07	10.28	5.82	18.14
Capsicum annuum	Heart rate increased	13	7.36	4.2	12.89	7.38	4.21	12.94
Medicago sativa	Heart rate increased	4	4.27	1.57	11.58	4.28	1.58	11.62
Ephedra sinica	Heart rate increased	8	11.43	5.53	23.63	11.45	5.53	23.7
Ephedra sp	Heart rate increased	8	11.43	5.53	23.63	11.45	5.53	23.7
Citrus aurantium	Heart rate increased	12	5.4	3.03	9.63	5.41	3.03	9.66
Turnera diffusa	Heart rate increased	3	13.19	3.99	43.56	13.2	3.99	43.63
Foeniculum vulgare	Heart rate increased	5	6.35	2.58	15.62	6.36	2.58	15.66
Taraxacum officinale	Heart rate increased	3	3.24	1.03	10.2	3.24	1.03	10.21
Taraxacum sp	Heart rate increased	3	3.57	1.13	11.26	3.57	1.13	11.27
Panax ginseng	Heart rate increased	19	5.47	3.46	8.66	5.49	3.46	8.71
Theobroma cacao	Heart rate increased	7	14.04	6.41	30.76	14.06	6.41	30.84
Camellia siangensis	Heart rate increased	16	5.94	3.6	9.81	5.96	3.6	9.86
Camellia sinensis	Heart rate increased	17	4.65	2.87	7.55	4.66	2.87	7.57
Ilex paraguariensis	Heart rate increased	6	10.39	4.51	23.95	10.41	4.51	24.02
Plectranthus barbatus	Heart rate increased	5	20.42	7.89	52.86	20.44	7.89	52.96
Garcinia gummi-gutta	Heart rate increased	5	6.89	2.8	16.98	6.89	2.79	17
Gymnema sylvestre	Heart rate increased	4	10.39	3.73	28.91	10.4	3.74	28.96
Cola acuminata	Heart rate increased	5	10.03	4.02	25.01	10.04	4.02	25.06
Calea acuminata	Heart rate increased	5	10.03	4.02	25.01	10.04	4.02	25.06
Aloe africana	Heart rate increased	3	4.23	1.34	13.39	4.24	1.34	13.43
Aloe bargalensis	Heart rate increased	4	4.62	1.7	12.55	4.62	1.7	12.56
Aloe succotrina	Heart rate increased	3	3.65	1.16	11.52	3.65	1.16	11.53
Aloe vallaris	Heart rate increased	3	4.23	1.34	13.39	4.24	1.34	13.43
Aloe vera	Heart rate increased	4	4.08	1.51	11.06	4.09	1.51	11.09
Silybum marianum	Heart rate increased	6	3.27	1.45	7.36	3.27	1.45	7.37
Arctium lappa	Heart rate increased	4	5.14	1.89	13.99	5.14	1.89	14
Paullinia cupana	Heart rate increased	12	12.36	6.82	22.41	12.39	6.82	22.49
Lepidium meyenii	Heart rate increased	4	4.53	1.67	12.3	4.53	1.67	12.31
Piper nigrum	Heart rate increased	5	11.91	4.74	29.9	11.92	4.74	29.96
Eleutherococcus senticosus	Heart rate increased	6	3.41	1.51	7.68	3.42	1.52	7.71
Coffea arabica	Heart rate increased	5	15.88	6.23	40.45	15.9	6.24	40.54
Withania somnifera	Heart rate increased	5	5.24	2.14	12.84	5.25	2.14	12.87
Acacia senegal	Heart rate increased	3	20.18	5.92	68.84	20.19	5.91	68.92
Aconitum napellus	Heart rate increased	3	18.05	5.34	60.98	18.06	5.34	61.05
Eschscholzia californica	Heart rate increased	3	57.17	14.3	228.53	57.2	14.3	228.78
Echinacea purpurea	Heart rate increased	3	13.72	4.14	45.43	13.73	4.14	45.49
Olea europaea	Heart rate increased	3	5.62	1.76	17.9	5.63	1.77	17.95
Coffea canephora	Heart rate increased	6	15.95	6.79	37.46	15.97	6.79	37.54
Citrus limon	Heart rate increased	10	5.37	2.85	10.12	5.38	2.85	10.15
Plantago notata	Heart rate increased	4	5.32	1.95	14.49	5.32	1.95	14.5
Plantago ovata	Heart rate increased	4	5.32	1.95	14.49	5.32	1.95	14.5
Glycine soja	Hypertension	9	5.39	2.74	10.59	5.4	2.75	10.61
Carthamus tinctorius	Hypertension	3	3.99	1.25	12.72	3.99	1.25	12.73
Harpagophytum procumbens	Hypertension	3	4.9	1.53	15.73	4.91	1.53	15.77
Zingiber officinale	Hypertension	9	3.32	1.7	6.47	3.32	1.7	6.47
Hydrastis canadensis	Hypertension	3	7.36	2.25	24.03	7.36	2.25	24.04
Astragalus membranaceus	Hypertension	3	3.41	1.07	10.83	3.41	1.07	10.84
Vaccinium myrtillus	Hypertension	4	3.3	1.21	8.97	3.31	1.22	9
Lepidium meyenii	Hypertension	5	3.92	1.6	9.62	3.93	1.6	9.65
Ilex paraguariensis	Hypertension	3	3.41	1.07	10.83	3.41	1.07	10.84
Valeriana officinalis	Hypertension	4	3.49	1.28	9.5	3.49	1.28	9.5
Passiflora incarnata	Hypertension	5	4.56	1.85	11.23	4.56	1.85	11.24
Curcuma longa	Hypertension	8	4.24	2.08	8.63	4.25	2.09	8.66
Curcuma zanthorrhiza	Hypertension	3	4.2	1.31	13.41	4.2	1.31	13.42
Silybum marianum	Hypertension	8	3.02	1.49	6.12	3.02	1.49	6.12
Curcuma xanthorrhiza	Hypertension	3	4.2	1.31	13.41	4.2	1.31	13.42
Crataegus pinnatifida	Hypertension	4	7.13	2.56	19.84	7.14	2.56	19.88
Cola nitida	Hypertension	3	3.86	1.21	12.3	3.86	1.21	12.31
Astragalus propinquus	Hypertension	3	3.41	1.07	10.83	3.41	1.07	10.84
Plantago asiatica	Anaphylactoid reaction	58	8.72	6.74	11.29	8.94	6.86	11.66
Glycine soja	Anaphylactoid reaction	3	5.78	1.84	18.13	5.79	1.84	18.19
Capsicum annuum	Anaphylactoid reaction	3	3.74	1.2	11.68	3.74	1.2	11.7
Capsicum frutescens	Anaphylactoid reaction	3	3.74	1.2	11.68	3.74	1.2	11.7
Abies balsamea	Haematemesis	3	30.43	9.55	96.99	30.53	9.54	97.66
Capsicum annuum	Haematemesis	3	8.18	2.62	25.52	8.21	2.62	25.71
Capsicum baccatum	Haematemesis	3	8.18	2.62	25.52	8.21	2.62	25.71
Capsicum frutescens	Haematemesis	3	8.18	2.62	25.52	8.21	2.62	25.71
Echinacea angustifolia	Cough	12	3.3	1.84	5.91	3.31	1.85	5.93
Melaleuca alternifolia	Cough	8	6.48	3.12	13.47	6.49	3.12	13.5
Drosera rotundifolia	Cough	3	15.25	4.26	54.66	15.25	4.25	54.67
Bryonia alba	Cough	3	6.99	2.11	23.21	6.99	2.1	23.22
Arnica montana	Cough	3	6.21	1.88	20.47	6.21	1.88	20.47
Origanum vulgare	Cough	3	3.23	1.01	10.34	3.23	1.01	10.34
Panax ginseng	Paralysis	3	6.73	2.17	20.89	6.76	2.16	21.11
Linum usitatissimum	Pulmonary oedema	3	4.54	1.45	14.17	4.54	1.45	14.2
Digitaria purpurea	Bradycardia	3	7.88	2.5	24.86	7.88	2.49	24.89
Digitalis purpurea	Bradycardia	3	7.88	2.5	24.86	7.88	2.49	24.89
Glycine soja	Bradycardia	3	5.4	1.72	16.94	5.41	1.72	17
Camellia siangensis	Hypokalaemia	4	7.91	2.96	21.16	7.94	2.96	21.33
Camellia sinensis	Hypokalaemia	4	5.87	2.2	15.68	5.89	2.2	15.8
Echinacea angustifolia	Hypokalaemia	3	8.95	2.87	27.92	8.98	2.87	28.12
Glycyrrhiza glabra	Hypokalaemia	5	20.28	8.35	49.28	20.39	8.35	49.8
Melaleuca alternifolia	Pain	7	3.33	1.53	7.24	3.33	1.53	7.24
Serenoa repens	Pain	9	3.22	1.62	6.38	3.22	1.62	6.38
Digitaria purpurea	Renal impairment	3	11.06	3.51	34.88	11.08	3.51	35.01
Digitalis purpurea	Renal impairment	3	11.06	3.51	34.88	11.08	3.51	35.01
Valeriana officinalis	Chest discomfort	3	3.35	1.06	10.58	3.35	1.06	10.58
Camellia siangensis	Chest discomfort	10	3.24	1.73	6.08	3.24	1.73	6.08
Gymnema sylvestre	Chest discomfort	3	6.78	2.11	21.81	6.78	2.11	21.82
Ilex paraguariensis	Chest discomfort	3	4.42	1.39	14.04	4.42	1.39	14.05
Taraxacum sp	Chest discomfort	3	3.18	1.01	10.03	3.18	1.01	10.04
Paullinia cupana	Chest discomfort	4	3.42	1.26	9.26	3.42	1.26	9.27
Linum usitatissimum	Chest discomfort	9	4.22	2.17	8.22	4.22	2.17	8.22
Trigonella foenum-graecum	Chest discomfort	4	9.68	3.47	26.99	9.69	3.47	27.03
Coffea canephora	Chest discomfort	3	6.63	2.06	21.31	6.63	2.06	21.32
Linum usitatissimum	Anaemia	6	4.57	2.03	10.28	4.58	2.03	10.31
Ginkgo biloba	Gastrointestinal haemorrhage	5	3.75	1.55	9.09	3.75	1.54	9.1
Panax ginseng	Syncope	8	3.11	1.55	6.26	3.12	1.55	6.29
Paullinia cupana	Syncope	3	3.97	1.26	12.48	3.97	1.26	12.49
Capsicum annuum	Syncope	7	5.34	2.52	11.33	5.35	2.52	11.37
Zingiber officinale	Syncope	5	3.66	1.51	8.88	3.66	1.51	8.89
Citrus aurantium	Syncope	5	3.04	1.26	7.36	3.04	1.25	7.37
Ilex paraguariensis	Syncope	3	6.9	2.17	21.91	6.9	2.17	21.93
Panax quinquefolius	Syncope	5	4.01	1.65	9.73	4.01	1.65	9.75
Astragalus membranaceus	Syncope	3	6.9	2.17	21.91	6.9	2.17	21.93
Astragalus propinquus	Syncope	3	6.9	2.17	21.91	6.9	2.17	21.93
Ambrosia artemisiifolia	Injection site pain	5	23.82	9.3	60.98	23.86	9.31	61.15
Zingiber officinale	Dysphagia	4	3.16	1.18	8.49	3.17	1.18	8.53
Salvia alba	Dysphagia	3	3.34	1.07	10.46	3.34	1.06	10.48
Eleutherococcus senticosus	Dysphagia	6	5.15	2.29	11.59	5.16	2.29	11.63
Salix alba	Dysphagia	3	3.34	1.07	10.46	3.34	1.06	10.48
Capsicum annuum	Dysphagia	4	3.27	1.22	8.79	3.27	1.22	8.8
Mentha piperita	Dysphagia	3	6.9	2.18	21.87	6.9	2.17	21.89
Lepidium meyenii	Dysphagia	4	6.83	2.52	18.54	6.84	2.52	18.59
Cinnamomum verum	Dysphagia	3	6.47	2.04	20.48	6.47	2.04	20.5
Rhodiola rosea	Dysphagia	3	6.09	1.93	19.25	6.09	1.92	19.27
Sedum griseum	Dysphagia	3	6.47	2.04	20.48	6.47	2.04	20.5
Tribulus terrestris	Dysphagia	3	9.58	3	30.62	9.59	3	30.69
Terminalia chebula	Dysphagia	3	11.25	3.5	36.15	11.26	3.5	36.22
Plantago notata	Dysphagia	3	5.95	1.88	18.8	5.95	1.88	18.82
Plantago ovata	Dysphagia	3	5.95	1.88	18.8	5.95	1.88	18.82
Lycium chinense	Dysphagia	3	7.29	2.3	23.13	7.29	2.29	23.16
Withania somnifera	Dysphagia	3	4.66	1.48	14.66	4.66	1.48	14.68
Curcuma longa	Dysphagia	3	3.38	1.08	10.59	3.38	1.08	10.6
Citrus grandis	Dysphagia	3	3.59	1.14	11.26	3.59	1.14	11.27
Plantago asiatica	Flatulence	21	3.75	2.45	5.75	3.79	2.46	5.84
Citrus grandis	Flatulence	3	6.68	2.13	20.94	6.69	2.13	21.01
Vaccinium macrocarpon	Flatulence	6	8.75	3.89	19.66	8.78	3.9	19.78
Avena sativa	Flatulence	4	4.82	1.8	12.92	4.83	1.8	12.98
Avena sativa	Flatulence	4	4.88	1.82	13.08	4.89	1.82	13.14
Passiflora incarnata	Flatulence	4	14.75	5.42	40.14	14.78	5.42	40.31
Withania somnifera	Flatulence	4	11.66	4.3	31.58	11.69	4.31	31.74
Linum usitatissimum	Flatulence	5	7.26	3	17.59	7.28	3	17.69
Lepidium meyenii	Flatulence	5	16.04	6.54	39.33	16.08	6.54	39.53
Brassica oleracea	Flatulence	5	32.73	13.06	82.04	32.82	13.06	82.47
Medicago sativa	Flatulence	4	11.99	4.42	32.49	12.02	4.42	32.65
Spinacia oleracea	Flatulence	4	53.46	18.57	153.91	53.58	18.57	154.59
Salvia hispanica	Flatulence	4	55.78	19.31	161.12	55.91	19.31	161.84
Euterpe oleracea	Flatulence	4	41.39	14.63	117.13	41.48	14.63	117.64
Aristotelia chilensis	Flatulence	3	74.02	21.11	259.52	74.15	21.11	260.45
Garcinia mangostana	Flatulence	4	55.78	19.31	161.12	55.91	19.31	161.84
Punica granatum	Flatulence	4	20.05	7.31	55	20.09	7.31	55.23
Lycium barbarum	Flatulence	5	27.18	10.92	67.64	27.26	10.93	68.01
Chlorella vulgaris	Flatulence	4	32.07	11.49	89.54	32.15	11.49	89.96
Chlorella pyrenoidosa	Flatulence	4	32.07	11.49	89.54	32.15	11.49	89.96
Chlorella sp	Flatulence	4	32.07	11.49	89.54	32.15	11.49	89.96
Cannabis sativa	Aggression	35	9.48	6.78	13.25	9.63	6.85	13.53
Cannabis sativa	Paranoia	8	5.01	2.51	10.01	5.05	2.51	10.16
Panax ginseng	Generalised oedema	3	6.38	2.05	19.81	6.41	2.05	20.01
Panax quinquefolius	Generalised oedema	3	13.17	4.22	41.07	13.23	4.22	41.48
Hypericum perfoliatum	Depression	10	7.07	3.72	13.44	7.08	3.72	13.47
Hypericum perforatum	Depression	10	7.07	3.72	13.44	7.08	3.72	13.47
Silybum marianum	Depression	8	3.56	1.76	7.21	3.57	1.76	7.24
Passiflora incarnata	Depression	3	3.16	1	9.98	3.16	1	9.99
Valeriana officinalis	Depression	4	4.12	1.51	11.21	4.12	1.51	11.22
Calendula officinalis	Depression	4	10.89	3.87	30.68	10.9	3.87	30.73
Humulus lupulus	Depression	3	8.17	2.51	26.59	8.17	2.51	26.61
Schisandra chinensis	Depression	3	4.03	1.27	12.8	4.03	1.27	12.81
Curcuma longa	Back pain	7	3.86	1.81	8.23	3.86	1.81	8.24
Curcuma zanthorrhiza	Back pain	3	4.4	1.38	14.05	4.4	1.38	14.06
Linum usitatissimum	Back pain	9	3.41	1.75	6.64	3.41	1.75	6.65
Foeniculum vulgare	Back pain	4	3.61	1.33	9.82	3.61	1.33	9.83
Petroselinum crispum	Back pain	4	6.85	2.47	18.99	6.85	2.47	19
Curcuma xanthorrhiza	Back pain	3	4.4	1.38	14.05	4.4	1.38	14.06
Serenoa repens	Back pain	4	3.35	1.23	9.1	3.35	1.23	9.11
Symphytum officinale	Back pain	3	18.96	5.4	66.52	18.97	5.4	66.59
Calendula officinalis	Back pain	3	7.04	2.17	22.88	7.04	2.16	22.9
Tanacetum vulgare	Back pain	3	18.96	5.4	66.52	18.97	5.4	66.59
Theobroma cacao	Back pain	3	4.04	1.27	12.87	4.04	1.27	12.88
Rheum palmatum	Back pain	3	9.86	2.98	32.65	9.86	2.98	32.67
Punica granatum	Back pain	3	3.79	1.19	12.06	3.79	1.19	12.06
Plantago notata	Back pain	4	3.82	1.4	10.41	3.82	1.4	10.41
Plantago ovata	Back pain	4	3.82	1.4	10.41	3.82	1.4	10.41
Cynara scolymus	Blood creatine phosphokinase increased	3	15.76	4.95	50.23	15.79	4.95	50.42
Allium salinum	Blood creatine phosphokinase increased	3	3.35	1.07	10.44	3.35	1.07	10.46
Allium sativum	Blood creatine phosphokinase increased	3	3.18	1.02	9.91	3.19	1.02	9.96
Panax ginseng	Blood creatine phosphokinase increased	6	4.54	2.03	10.15	4.55	2.03	10.2
Avena sativa	Blood creatine phosphokinase increased	3	3.48	1.12	10.85	3.49	1.12	10.9
Capsicum annuum	Blood creatine phosphokinase increased	3	4.39	1.41	13.71	4.39	1.4	13.73
Avena sativa	Blood creatine phosphokinase increased	3	3.52	1.13	10.97	3.53	1.13	11.03
Ginkgo biloba	Blood creatine phosphokinase increased	3	4.1	1.31	12.8	4.1	1.31	12.82
Eleutherococcus senticosus	Blood creatine phosphokinase increased	4	6.11	2.27	16.42	6.12	2.27	16.48
Paullinia cupana	Blood creatine phosphokinase increased	4	10.42	3.85	28.19	10.44	3.85	28.31
Citrus aurantium	Blood creatine phosphokinase increased	5	5.94	2.45	14.37	5.95	2.45	14.43
Camellia siangensis	Blood creatine phosphokinase increased	4	3.87	1.45	10.36	3.88	1.45	10.41
Ilex paraguariensis	Blood creatine phosphokinase increased	4	18.23	6.66	49.92	18.27	6.66	50.14
Astragalus membranaceus	Blood creatine phosphokinase increased	3	13.48	4.25	42.79	13.5	4.25	42.93
Zingiber officinale	Blood creatine phosphokinase increased	3	4.25	1.36	13.27	4.25	1.36	13.29
Cynara cardunculus	Blood creatine phosphokinase increased	3	15.76	4.95	50.23	15.79	4.95	50.42
Nicotiana tabacum	Loss of consciousness	5	5.76	2.36	14.08	5.77	2.36	14.12
Cannabis sativa	Loss of consciousness	26	3.76	2.55	5.54	3.78	2.56	5.59
Paullinia cupana	Loss of consciousness	4	4.69	1.73	12.7	4.69	1.73	12.71
Plectranthus barbatus	Loss of consciousness	3	13.94	4.26	45.66	13.95	4.26	45.73
Camellia siangensis	Loss of consciousness	7	3.08	1.46	6.51	3.08	1.46	6.52
Capsicum annuum	Loss of consciousness	7	4.69	2.21	9.95	4.7	2.21	9.99
Abies balsamea	Loss of consciousness	5	12.68	5.08	31.66	12.69	5.08	31.72
Capsicum baccatum	Loss of consciousness	7	4.69	2.21	9.95	4.7	2.21	9.99
Capsicum frutescens	Loss of consciousness	7	4.69	2.21	9.95	4.7	2.21	9.99
Eucalyptus globulus	Loss of consciousness	4	4.53	1.67	12.26	4.54	1.68	12.3
Ginkgo biloba	Loss of consciousness	5	3.1	1.28	7.52	3.1	1.28	7.52
Echinacea angustifolia	Loss of consciousness	5	3.32	1.37	8.06	3.32	1.37	8.06
Rhodiola rosea	Loss of consciousness	3	4.92	1.56	15.55	4.92	1.55	15.57
Theobroma cacao	Loss of consciousness	3	6.86	2.15	21.85	6.86	2.15	21.87
Ilex paraguariensis	Loss of consciousness	3	6.06	1.91	19.24	6.07	1.91	19.29
Malus domestica	Loss of consciousness	3	4.92	1.56	15.55	4.92	1.55	15.57
Plantago asiatica	Urinary retention	14	4.11	2.44	6.93	4.15	2.44	7.05
Plantago asiatica	Constipation	66	4.41	3.46	5.63	4.46	3.48	5.71
Linum usitatissimum	Constipation	9	4.84	2.49	9.42	4.85	2.49	9.45
Attalea racemosa	Constipation	3	4.67	1.47	14.8	4.67	1.47	14.81
Actaea cimicifuga	Constipation	3	4.67	1.47	14.8	4.67	1.47	14.81
Actaea racemosa	Constipation	3	4.67	1.47	14.8	4.67	1.47	14.81
Passiflora incarnata	Constipation	5	6.79	2.76	16.72	6.8	2.76	16.76
Ananas comosus	Constipation	4	4.97	1.83	13.51	4.97	1.83	13.52
Aloe succotrina	Constipation	3	3.73	1.18	11.77	3.73	1.18	11.78
Coffea arabica	Constipation	4	12.63	4.5	35.42	12.64	4.5	35.48
Foeniculum vulgare	Constipation	3	3.81	1.21	12.03	3.81	1.21	12.04
Arctium lappa	Constipation	4	5.25	1.93	14.29	5.25	1.93	14.3
Vaccinium macrocarpon	Constipation	14	7.71	4.49	13.23	7.73	4.5	13.29
Borago officinalis	Constipation	8	3.99	1.97	8.07	4	1.98	8.1
Citrus aurantium	Constipation	8	3.62	1.79	7.31	3.63	1.79	7.34
Punica granatum	Constipation	3	5.39	1.69	17.14	5.39	1.69	17.16
Matricaria chamomilla	Constipation	3	4.61	1.45	14.61	4.61	1.45	14.62
Schisandra chinensis	Constipation	5	8.72	3.52	21.62	8.72	3.51	21.64
Phyllanthus emblica	Constipation	3	7.46	2.32	23.96	7.46	2.32	23.98
Senna alexandrina	Constipation	162	4.46	3.82	5.2	4.59	3.91	5.38
Plantago notata	Constipation	9	12.98	6.52	25.83	13	6.53	25.9
Plantago ovata	Constipation	9	12.98	6.52	25.83	13	6.53	25.9
Lycium barbarum	Constipation	3	5.74	1.8	18.29	5.75	1.8	18.33
Mentha piperita	Constipation	3	4.67	1.47	14.8	4.67	1.47	14.81
Cinnamomum verum	Constipation	4	5.91	2.17	16.13	5.92	2.17	16.17
Rhodiola rosea	Constipation	4	5.56	2.04	15.15	5.57	2.04	15.19
Sedum griseum	Constipation	4	5.91	2.17	16.13	5.92	2.17	16.17
Withania somnifera	Constipation	4	4.25	1.57	11.52	4.25	1.57	11.53
Serenoa repens	Gait disturbance	5	5.23	2.13	12.84	5.23	2.13	12.85
Panax quinquefolius	Gait disturbance	6	3.09	1.37	6.96	3.09	1.37	6.96
Citrus limon	Seizure	8	3.22	1.59	6.52	3.22	1.59	6.52
Eucalyptus globulus	Seizure	5	3.54	1.45	8.65	3.55	1.45	8.69
Citrus aurantium	Seizure	9	3.03	1.56	5.89	3.03	1.56	5.89
Punica granatum	Seizure	3	3.99	1.25	12.69	3.99	1.25	12.7
Paullinia cupana	Head discomfort	5	35.53	14.57	86.66	35.81	14.58	87.93
Eleutherococcus senticosus	Head discomfort	4	16.52	6.16	44.31	16.62	6.16	44.85
Hypericum perfoliatum	Agitation	5	4.68	1.92	11.42	4.68	1.92	11.43
Hypericum perforatum	Agitation	5	4.68	1.92	11.42	4.68	1.92	11.43
Ephedra sinica	Agitation	3	4.49	1.42	14.19	4.5	1.42	14.24
Salvia alba	Agitation	8	6.79	3.34	13.82	6.8	3.34	13.86
Salix alba	Agitation	8	6.79	3.34	13.82	6.8	3.34	13.86
Paullinia cupana	Agitation	4	4.28	1.58	11.59	4.28	1.58	11.6
Ephedra sp	Agitation	3	4.49	1.42	14.19	4.5	1.42	14.24
Serenoa repens	Agitation	3	3.86	1.22	12.17	3.86	1.22	12.18
Valeriana officinalis	Agitation	3	4.2	1.33	13.26	4.2	1.33	13.27
Hedera canariensis	Agitation	3	29.38	8.38	103.06	29.4	8.37	103.21
Hedera helix	Agitation	3	29.38	8.38	103.06	29.4	8.37	103.21
Cinnamomum camphora	Application site reaction	4	49.82	17.25	143.92	49.93	17.25	144.52
Capsicum annuum	Application site reaction	4	5.43	2.02	14.59	5.44	2.02	14.64
Capsicum frutescens	Application site reaction	4	5.43	2.02	14.59	5.44	2.02	14.64
Aloe africana	Application site reaction	3	10.61	3.35	33.56	10.63	3.35	33.68
Aloe bargalensis	Application site reaction	4	11.57	4.26	31.41	11.6	4.26	31.55
Aloe succotrina	Application site reaction	3	9.14	2.9	28.83	9.16	2.9	28.94
Aloe vallaris	Application site reaction	3	10.61	3.35	33.56	10.63	3.35	33.68
Aloe vera	Application site reaction	4	10.23	3.78	27.71	10.25	3.78	27.82
Eucalyptus globulus	Application site reaction	4	9.32	3.45	25.2	9.33	3.44	25.28
Citrus aurantium	Application site reaction	3	3.27	1.05	10.2	3.27	1.05	10.21
Citrus limon	Application site reaction	4	5.23	1.95	14.05	5.24	1.95	14.1
Melaleuca alternifolia	Application site reaction	3	11.61	3.66	36.79	11.63	3.66	36.92
Melaleuca lutea	Application site reaction	3	14.82	4.65	47.26	14.84	4.65	47.4
Citrus aurantium	Restlessness	3	6.62	2.13	20.62	6.64	2.12	20.76
Scutellaria lateriflora	Jaundice	3	37.45	11.29	124.26	37.51	11.28	124.68
Hypericum perfoliatum	Jaundice	3	6.51	2.08	20.41	6.52	2.08	20.48
Hypericum perforatum	Jaundice	3	6.51	2.08	20.41	6.52	2.08	20.48
Silybum marianum	Jaundice	5	7.1	2.93	17.21	7.12	2.93	17.3
Capsicum annuum	Jaundice	4	5.68	2.11	15.26	5.69	2.11	15.32
Zingiber officinale	Jaundice	3	4.1	1.31	12.8	4.11	1.31	12.85
Salvia alba	Jaundice	3	5.8	1.85	18.16	5.81	1.85	18.23
Eleutherococcus senticosus	Jaundice	5	7.42	3.06	18	7.43	3.06	18.07
Salix alba	Jaundice	3	5.8	1.85	18.16	5.81	1.85	18.23
Centella asiatica	Jaundice	3	40.85	12.24	136.36	40.92	12.24	136.84
Medicago sativa	Jaundice	4	11.2	4.13	30.36	11.22	4.13	30.48
Curcuma longa	Jaundice	3	5.87	1.87	18.39	5.88	1.87	18.45
Oenothera biennis	Jaundice	3	8.25	2.62	25.95	8.26	2.62	26.03
Cynara scolymus	Jaundice	3	15.23	4.78	48.54	15.26	4.78	48.72
Panax ginseng	Jaundice	6	4.38	1.96	9.79	4.4	1.96	9.86
Althaea officinalis	Jaundice	5	8.61	3.54	20.92	8.63	3.54	21.02
Cynara cardunculus	Jaundice	3	15.23	4.78	48.54	15.26	4.78	48.72
Arctium lappa	Jaundice	4	13.47	4.95	36.64	13.49	4.95	36.77
Taraxacum officinale	Jaundice	4	11.41	4.21	30.94	11.44	4.21	31.08
Taraxacum sp	Jaundice	4	12.61	4.64	34.26	12.64	4.64	34.41
Attalea racemosa	Jaundice	4	16.19	5.93	44.23	16.23	5.93	44.44
Actaea cimicifuga	Jaundice	4	16.19	5.93	44.23	16.23	5.93	44.44
Actaea racemosa	Jaundice	4	16.19	5.93	44.23	16.23	5.93	44.44
Camellia siangensis	Jaundice	4	3.74	1.4	10.02	3.75	1.4	10.06
Camellia sinensis	Jaundice	5	3.48	1.44	8.39	3.49	1.44	8.44
Citrus limon	Jaundice	3	4.09	1.31	12.77	4.09	1.31	12.79
Passiflora incarnata	Jaundice	3	10.21	3.23	32.24	10.23	3.23	32.36
Withania somnifera	Jaundice	4	10.89	4.02	29.5	10.92	4.02	29.65
Panax japonicus	Jaundice	4	3.65	1.36	9.77	3.66	1.36	9.82
Serenoa repens	Dysgeusia	3	7.61	2.41	23.98	7.62	2.41	24.05
Styrax paralleloneurum	Dermatitis bullous	5	171.68	64.59	456.29	172.78	64.68	461.52
Atropa belladonna	Periorbital oedema	3	3.27	1.05	10.21	3.27	1.05	10.22
Eucalyptus globulus	Periorbital oedema	3	5.96	1.9	18.72	5.97	1.9	18.78
Hypericum perfoliatum	Nervousness	5	13.88	5.69	33.83	13.93	5.7	34.06
Hypericum perforatum	Nervousness	5	13.88	5.69	33.83	13.93	5.7	34.06
Paullinia cupana	Nervousness	3	9.44	3.01	29.65	9.46	3	29.78
Panax ginseng	Nervousness	6	5.53	2.47	12.36	5.54	2.47	12.42
Althaea officinalis	Nervousness	3	6.44	2.06	20.14	6.45	2.06	20.22
Camellia siangensis	Nervousness	5	5.92	2.45	14.3	5.94	2.45	14.39
Camellia sinensis	Nervousness	5	4.39	1.82	10.58	4.4	1.82	10.64
Curcuma longa	Nervousness	5	12.5	5.14	30.42	12.54	5.14	30.61
Curcuma zanthorrhiza	Nervousness	3	20.23	6.34	64.56	20.27	6.34	64.83
Curcuma xanthorrhiza	Nervousness	3	20.23	6.34	64.56	20.27	6.34	64.83
Capsicum annuum	Hypersensitivity	8	3.13	1.55	6.34	3.13	1.54	6.35
Capsicum frutescens	Hypersensitivity	8	3.13	1.55	6.34	3.13	1.54	6.35
Capsicum baccatum	Hypersensitivity	8	3.13	1.55	6.34	3.13	1.54	6.35
Panax ginseng	Hypersensitivity	18	3.67	2.29	5.88	3.67	2.29	5.89
Ananas comosus	Hypersensitivity	4	3.45	1.27	9.38	3.45	1.27	9.39
Oenothera biennis	Hypersensitivity	6	4.59	2.02	10.44	4.59	2.02	10.45
Foeniculum vulgare	Hypersensitivity	5	4.5	1.83	11.07	4.51	1.83	11.1
Citrus sinensis	Hypersensitivity	4	6.62	2.39	18.34	6.62	2.39	18.35
Melissa officinalis	Hypersensitivity	3	6.57	2.03	21.3	6.57	2.03	21.31
Medicago sativa	Hypersensitivity	5	3.82	1.56	9.36	3.83	1.56	9.39
Panax quinquefolius	Hypersensitivity	10	4.2	2.23	7.93	4.2	2.22	7.93
Arctium lappa	Hypersensitivity	4	3.64	1.34	9.91	3.64	1.34	9.92
Citrus limon	Hypersensitivity	12	4.61	2.58	8.24	4.62	2.58	8.27
Vaccinium myrtillus	Hypersensitivity	4	3.41	1.25	9.27	3.41	1.25	9.28
Bacopa monnieri	Hypersensitivity	4	7.05	2.54	19.58	7.05	2.54	19.59
Lepidium meyenii	Hypersensitivity	5	4.05	1.65	9.94	4.05	1.65	9.95
Tribulus terrestris	Hypersensitivity	3	4.5	1.41	14.39	4.5	1.41	14.4
Terminalia chebula	Hypersensitivity	3	5.29	1.65	17	5.29	1.64	17.01
Lycium barbarum	Hypersensitivity	3	3.99	1.25	12.71	3.99	1.25	12.72
Linum usitatissimum	Hypersensitivity	9	3.36	1.73	6.54	3.36	1.72	6.55
Punica granatum	Hypersensitivity	3	3.74	1.18	11.9	3.74	1.18	11.9
Lycium chinense	Hypersensitivity	4	4.63	1.69	12.68	4.63	1.69	12.69
Helianthus annuus	Hypersensitivity	3	12.8	3.79	43.24	12.8	3.79	43.27
Phleum pratense	Hypersensitivity	4	14.1	4.88	40.76	14.1	4.87	40.78
Borago officinalis	Arrhythmia	3	4.71	1.51	14.69	4.72	1.51	14.76
Nicotiana tabacum	Cardiac arrest	4	11	4.07	29.74	11.02	4.07	29.87
Ephedra sinica	Cardiac arrest	3	11.84	3.75	37.41	11.86	3.75	37.55
Salvia alba	Cardiac arrest	3	6.49	2.07	20.32	6.5	2.07	20.4
Salix alba	Cardiac arrest	3	6.49	2.07	20.32	6.5	2.07	20.4
Paullinia cupana	Cardiac arrest	3	8.38	2.67	26.32	8.4	2.67	26.44
Ephedra sp	Cardiac arrest	3	11.84	3.75	37.41	11.86	3.75	37.55
Capsicum annuum	Cardiac arrest	4	6.36	2.37	17.08	6.37	2.37	17.15
Zingiber officinale	Cardiac arrest	3	4.59	1.47	14.33	4.6	1.47	14.39
Mentha piperita	Cardiac arrest	3	13.41	4.23	42.48	13.44	4.23	42.66
Digitaria purpurea	Drug interaction	4	4.45	1.64	12.1	4.45	1.64	12.11
Digitalis purpurea	Drug interaction	4	4.45	1.64	12.1	4.45	1.64	12.11
Avena sativa	Drug interaction	12	4.81	2.7	8.58	4.82	2.7	8.6
Avena sp	Drug interaction	12	5.99	3.35	10.71	6	3.35	10.74
Avena sativa	Drug interaction	12	4.87	2.73	8.68	4.87	2.73	8.69
Eucalyptus globulus	Drug interaction	4	3.36	1.24	9.09	3.36	1.24	9.1
Nicotiana tabacum	Drug interaction	4	3.39	1.25	9.17	3.39	1.25	9.18
Carthamus tinctorius	Drug interaction	3	5.26	1.65	16.77	5.26	1.65	16.78
Hypericum perfoliatum	Drug interaction	8	6.22	3.05	12.69	6.23	3.05	12.72
Hypericum perforatum	Drug interaction	8	6.22	3.05	12.69	6.23	3.05	12.72
Gymnema sylvestre	Drug interaction	3	6.89	2.14	22.16	6.9	2.14	22.21
Matricaria chamomilla	Drug interaction	4	5.51	2.02	15.06	5.52	2.02	15.1
Panax quinquefolius	Drug interaction	7	3.69	1.74	7.84	3.7	1.74	7.87
Aloe africana	Drug interaction	3	3.83	1.21	12.12	3.83	1.21	12.13
Aloe succotrina	Drug interaction	3	3.3	1.05	10.41	3.3	1.05	10.42
Aloe vallaris	Drug interaction	3	3.83	1.21	12.12	3.83	1.21	12.13
Taraxacum officinale	Drug interaction	5	4.97	2.03	12.19	4.97	2.03	12.2
Taraxacum sp	Drug interaction	4	4.35	1.6	11.83	4.36	1.6	11.86
Cannabis sativa	Hallucination, auditory	5	5.37	2.24	12.87	5.42	2.24	13.11
Hypericum perfoliatum	Insomnia	8	4.17	2.04	8.51	4.17	2.04	8.51
Hypericum perforatum	Insomnia	8	4.17	2.04	8.51	4.17	2.04	8.51
Ephedra sinica	Insomnia	7	5.98	2.76	12.94	5.99	2.77	12.97
Salvia alba	Insomnia	11	5.18	2.81	9.56	5.19	2.81	9.58
Salix alba	Insomnia	11	5.18	2.81	9.56	5.19	2.81	9.58
Cola acuminata	Insomnia	4	4.78	1.74	13.16	4.78	1.73	13.17
Calea acuminata	Insomnia	4	4.78	1.74	13.16	4.78	1.73	13.17
Ephedra sp	Insomnia	7	5.98	2.76	12.94	5.99	2.77	12.97
Paullinia cupana	Insomnia	8	4.82	2.35	9.87	4.82	2.35	9.87
Rehmannia glutinosa	Insomnia	3	12.22	3.58	41.69	12.23	3.58	41.74
Cynara scolymus	Insomnia	6	7.42	3.2	17.22	7.42	3.2	17.23
Garcinia gummi-gutta	Insomnia	8	6.93	3.35	14.33	6.93	3.35	14.34
Fallopia multiflora	Insomnia	4	18.47	6.13	55.64	18.48	6.13	55.69
Valeriana officinalis	Insomnia	10	8.24	4.28	15.87	8.25	4.28	15.9
Oenothera biennis	Insomnia	6	3.92	1.72	8.92	3.92	1.72	8.93
Arctostaphylos uva-ursi	Insomnia	3	4.52	1.41	14.53	4.52	1.41	14.54
Ilex paraguariensis	Insomnia	4	4.07	1.49	11.15	4.08	1.49	11.19
Camellia siangensis	Insomnia	20	4.56	2.9	7.17	4.57	2.91	7.19
Camellia sinensis	Insomnia	20	3.34	2.13	5.23	3.34	2.13	5.23
Piper nigrum	Insomnia	3	4.16	1.3	13.33	4.16	1.3	13.34
Commiphora wightii	Insomnia	3	7.16	2.18	23.5	7.17	2.18	23.54
Gymnema sylvestre	Insomnia	4	6.3	2.26	17.53	6.3	2.26	17.54
Mentha spicata	Insomnia	3	4.83	1.5	15.57	4.83	1.5	15.57
Linum usitatissimum	Insomnia	13	4.23	2.42	7.4	4.23	2.42	7.41
Passiflora incarnata	Insomnia	7	5.77	2.67	12.47	5.78	2.67	12.5
Humulus lupulus	Insomnia	4	8.39	2.97	23.68	8.4	2.98	23.72
Calendula officinalis	Insomnia	4	8.15	2.89	22.96	8.15	2.89	22.97
Rhodiola rosea	Insomnia	4	3.3	1.21	9	3.3	1.21	9
Sedum griseum	Insomnia	4	3.51	1.29	9.58	3.51	1.29	9.59
Valeriana mexicana	Insomnia	3	20.78	5.72	75.49	20.78	5.72	75.52
Zea mays	Insomnia	3	3.85	1.2	12.31	3.85	1.2	12.32
Coffea arabica	Insomnia	3	5.47	1.69	17.72	5.47	1.69	17.72
Frangula alnus	Insomnia	5	9.62	3.78	24.51	9.62	3.77	24.52
Cynara cardunculus	Insomnia	6	7.42	3.2	17.22	7.42	3.2	17.23
Peumus boldus	Insomnia	3	12.98	3.78	44.54	12.99	3.78	44.59
Rhamnus frangula	Insomnia	5	9.62	3.78	24.51	9.62	3.77	24.52
Phyllanthus emblica	Insomnia	3	4.42	1.38	14.2	4.42	1.38	14.2
Terminalia chebula	Insomnia	3	4.52	1.41	14.53	4.52	1.41	14.54
Terminalia bellirica	Insomnia	3	4.33	1.35	13.9	4.33	1.35	13.9
Curcuma zanthorrhiza	Insomnia	3	3.71	1.16	11.85	3.71	1.16	11.86
Curcuma xanthorrhiza	Insomnia	3	3.71	1.16	11.85	3.71	1.16	11.86
Crataegus pinnatifida	Insomnia	3	4.62	1.44	14.86	4.62	1.44	14.87
Coffea canephora	Insomnia	3	4.52	1.41	14.53	4.52	1.41	14.54
Angelica archangelica	Insomnia	3	11.54	3.4	39.17	11.55	3.4	39.22
Rumex crispus	Insomnia	3	5.94	1.83	19.31	5.94	1.83	19.32
Rumex crassus	Insomnia	3	5.94	1.83	19.31	5.94	1.83	19.32
Plantago notata	Insomnia	5	4.07	1.65	10.03	4.08	1.66	10.06
Plantago ovata	Insomnia	5	4.07	1.65	10.03	4.08	1.66	10.06
Robinia pseudoacacia	Insomnia	4	10.65	3.72	30.51	10.66	3.72	30.55
Olea europaea	Insomnia	3	3.41	1.07	10.87	3.41	1.07	10.87
Citrus limon	Insomnia	13	4.29	2.45	7.51	4.29	2.45	7.52
Glycine soja	Injection site reaction	5	4.89	2	11.93	4.89	2	11.95
Ambrosia artemisiifolia	Injection site reaction	7	29.8	13.13	67.63	29.85	13.14	67.83
Curcuma longa	Injection site reaction	4	3.47	1.29	9.36	3.48	1.29	9.4
Bacopa monnieri	Injection site reaction	4	11.48	4.13	31.88	11.49	4.13	31.93
Withania somnifera	Injection site reaction	4	4.8	1.77	13.01	4.8	1.77	13.02
Silybum marianum	Injection site reaction	5	3.13	1.29	7.59	3.13	1.29	7.6
Plantago asiatica	Rhinitis	30	12.57	8.83	17.9	13.07	9.04	18.89
Panax quinquefolius	Influenza like illness	3	3.12	1	9.75	3.12	1	9.76
Juniperus communis	Influenza like illness	3	10.76	3.37	34.32	10.77	3.37	34.4
Trifolium pratense	Influenza like illness	3	13	4.05	41.71	13.01	4.05	41.8
Silybum marianum	Influenza like illness	4	3.92	1.46	10.53	3.93	1.46	10.58
Althaea officinalis	Influenza like illness	3	3.55	1.13	11.11	3.55	1.13	11.12
Petroselinum crispum	Influenza like illness	3	12.74	3.97	40.85	12.75	3.97	40.93
Arctium lappa	Influenza like illness	4	9.35	3.44	25.44	9.36	3.43	25.51
Taraxacum officinale	Influenza like illness	3	5.89	1.87	18.54	5.89	1.87	18.57
Zingiber officinale	Influenza like illness	5	4.79	1.98	11.61	4.8	1.98	11.66
Withania somnifera	Influenza like illness	3	5.62	1.79	17.68	5.63	1.79	17.74
Foeniculum vulgare	Influenza like illness	3	6.78	2.15	21.4	6.79	2.15	21.46
Glycyrrhiza glabra	Influenza like illness	4	5.3	1.97	14.29	5.31	1.97	14.34
Curcuma longa	Influenza like illness	4	5.47	2.03	14.75	5.48	2.03	14.8
Plantago asiatica	Salivary hypersecretion	8	3.51	1.76	7	3.54	1.76	7.12
Ginkgo biloba	Epistaxis	6	6.72	2.99	15.1	6.74	2.99	15.18
Zingiber officinale	Epistaxis	4	4.61	1.72	12.38	4.61	1.71	12.4
Garcinia gummi-gutta	Epistaxis	3	8.86	2.8	28	8.87	2.8	28.07
Taraxacum officinale	Epistaxis	3	7.1	2.26	22.35	7.11	2.26	22.42
Taraxacum sp	Epistaxis	3	7.85	2.49	24.75	7.85	2.49	24.79
Panax quinquefolius	Epistaxis	5	6.34	2.61	15.39	6.35	2.61	15.44
Vaccinium macrocarpon	Epistaxis	3	3.38	1.08	10.55	3.38	1.08	10.57
Astragalus membranaceus	Epistaxis	3	10.91	3.44	34.63	10.93	3.44	34.75
Citrus aurantium	Circulatory collapse	3	15.16	4.88	47.11	15.26	4.87	47.82
Teucrium scorodonia	Hepatitis	3	296.54	66.43	1323.73	297.19	66.45	1329.15
Silybum marianum	Hepatitis	3	5.57	1.78	17.39	5.58	1.78	17.46
Taraxacum officinale	Hepatitis	3	11.19	3.56	35.21	11.21	3.55	35.36
Taraxacum sp	Hepatitis	3	12.36	3.92	38.95	12.38	3.92	39.11
Allium salinum	Hepatitis	3	4.27	1.37	13.3	4.27	1.37	13.34
Allium sativum	Hepatitis	6	8.21	3.66	18.39	8.24	3.66	18.53
Hypericum perfoliatum	Hepatitis	4	11.54	4.28	31.14	11.58	4.28	31.34
Hypericum perforatum	Hepatitis	4	11.54	4.28	31.14	11.58	4.28	31.34
Panax ginseng	Hepatitis	4	3.84	1.44	10.27	3.85	1.44	10.32
Cannabis sativa	Mydriasis	3	3.11	1	9.63	3.12	1	9.72
Zingiber officinale	Mydriasis	3	14.02	4.5	43.67	14.09	4.49	44.17
Citrullus lanatus	Abdominal distension	3	60.59	16.08	228.29	60.64	16.08	228.68
Mentha piperita	Abdominal distension	3	6.46	2.04	20.47	6.47	2.04	20.53
Thymus vulgaris	Abdominal distension	4	5.52	2.04	14.95	5.53	2.04	14.99
Berberis vulgaris	Abdominal distension	4	32.31	11.05	94.48	32.35	11.05	94.7
Citrus grandis	Abdominal distension	4	4.52	1.67	12.2	4.52	1.67	12.22
Foeniculum vulgare	Abdominal distension	3	5.27	1.67	16.63	5.27	1.67	16.65
Petroselinum crispum	Abdominal distension	4	13.46	4.86	37.31	13.48	4.86	37.4
Silybum marianum	Abdominal distension	5	3.83	1.58	9.29	3.83	1.58	9.3
Ginkgo biloba	Abdominal distension	6	4.33	1.93	9.73	4.33	1.92	9.75
Carica papaya	Abdominal distension	3	13.85	4.26	45.01	13.86	4.26	45.09
Arctium lappa	Abdominal distension	4	7.26	2.67	19.76	7.27	2.67	19.81
Serenoa repens	Abdominal distension	5	8.33	3.39	20.45	8.34	3.39	20.5
Zingiber officinale	Abdominal distension	6	4.49	2	10.1	4.49	1.99	10.11
Lycium chinense	Abdominal distension	3	6.83	2.15	21.67	6.83	2.15	21.7
Schisandra chinensis	Abdominal distension	3	7.02	2.21	22.29	7.03	2.21	22.35
Ananas comosus	Abdominal distension	6	10.54	4.62	24.05	10.55	4.62	24.11
Juniperus communis	Abdominal distension	3	8.36	2.62	26.67	8.36	2.62	26.69
Aloe vera	Abdominal distension	3	4.29	1.36	13.49	4.29	1.36	13.51
Vaccinium macrocarpon	Abdominal distension	10	7.48	3.97	14.09	7.5	3.97	14.15
Citrus aurantium	Abdominal distension	5	3.1	1.28	7.51	3.1	1.28	7.52
Cannabis sativa	Psychotic disorder	15	5.84	3.52	9.7	5.89	3.53	9.83
Ginkgo biloba	Psychotic disorder	4	6.73	2.51	18.06	6.74	2.5	18.14
Cannabis sativa	Suicidal ideation	20	4.25	2.73	6.61	4.27	2.74	6.66
Hypericum perfoliatum	Suicidal ideation	4	6.02	2.23	16.26	6.03	2.23	16.31
Hypericum perforatum	Suicidal ideation	4	6.02	2.23	16.26	6.03	2.23	16.31
Silybum marianum	Suicidal ideation	5	4.89	2.02	11.86	4.9	2.02	11.9
Panax ginseng	Suicidal ideation	6	3.02	1.35	6.76	3.02	1.35	6.77
Echinacea angustifolia	Suicidal ideation	6	5.92	2.63	13.32	5.93	2.63	13.36
Panax ginseng	Lip swelling	8	5.47	2.72	11	5.49	2.72	11.07
Avena sativa	Lip swelling	4	4.2	1.57	11.26	4.2	1.56	11.28
Avena sativa	Lip swelling	4	4.24	1.58	11.37	4.25	1.58	11.42
Zingiber officinale	Lip swelling	6	7.75	3.45	17.42	7.77	3.45	17.51
Salvia alba	Lip swelling	3	5.4	1.72	16.91	5.41	1.72	16.97
Eleutherococcus senticosus	Lip swelling	6	8.33	3.7	18.74	8.35	3.7	18.83
Salix alba	Lip swelling	3	5.4	1.72	16.91	5.41	1.72	16.97
Citrus aurantium	Lip swelling	4	4.26	1.59	11.42	4.27	1.59	11.47
Linum usitatissimum	Lip swelling	3	3.75	1.2	11.71	3.76	1.2	11.76
Foeniculum vulgare	Lip swelling	5	15.5	6.31	38.1	15.54	6.31	38.29
Panax quinquefolius	Lip swelling	5	7.05	2.91	17.11	7.06	2.9	17.17
Camellia siangensis	Lip swelling	5	4.37	1.81	10.56	4.38	1.81	10.61
Camellia sinensis	Lip swelling	6	3.9	1.74	8.72	3.91	1.74	8.76
Capsicum annuum	Lip swelling	4	5.29	1.97	14.21	5.3	1.97	14.27
Glycyrrhiza glabra	Lip swelling	6	10.8	4.78	24.38	10.83	4.79	24.51
Lepidium meyenii	Lip swelling	3	8.21	2.61	25.86	8.22	2.61	25.93
Mucuna pruriens	Lip swelling	3	26.16	8.02	85.36	26.2	8.02	85.63
Hyssopus officinalis	Lip swelling	3	28.86	8.8	94.66	28.91	8.8	94.99
Mentha piperita	Lip swelling	3	11.16	3.52	35.36	11.18	3.52	35.48
Phyllanthus emblica	Lip swelling	3	17.81	5.55	57.17	17.84	5.55	57.37
Cinnamomum verum	Lip swelling	3	10.46	3.31	33.09	10.48	3.31	33.21
Rhodiola rosea	Lip swelling	3	9.85	3.12	31.12	9.86	3.11	31.21
Sedum griseum	Lip swelling	3	10.46	3.31	33.09	10.48	3.31	33.21
Tribulus terrestris	Lip swelling	3	15.5	4.85	49.53	15.52	4.85	49.68
Terminalia chebula	Lip swelling	3	18.2	5.67	58.47	18.22	5.66	58.63
Rumex crispus	Lip swelling	3	23.92	7.36	77.71	23.95	7.36	77.94
Vaccinium corymbosum	Lip swelling	3	31	9.41	102.1	31.05	9.41	102.44
Vaccinium myrtillus	Lip swelling	3	8.72	2.77	27.49	8.73	2.76	27.57
Bacopa monnieri	Lip swelling	3	17.81	5.55	57.17	17.84	5.55	57.37
Lycium barbarum	Lip swelling	3	13.72	4.31	43.69	13.74	4.31	43.83
Withania somnifera	Lip swelling	3	7.54	2.4	23.72	7.55	2.4	23.79
Arctium lappa	Lip swelling	3	9.3	2.95	29.35	9.31	2.94	29.44
Rumex crassus	Lip swelling	3	23.92	7.36	77.71	23.95	7.36	77.94
Schisandra chinensis	Lip swelling	3	12.13	3.82	38.5	12.15	3.82	38.63
Vaccinium macrocarpon	Lip swelling	3	3.75	1.2	11.71	3.76	1.2	11.76
Digitaria purpurea	Atrial fibrillation	5	16.84	6.85	41.37	16.88	6.85	41.57
Digitalis purpurea	Atrial fibrillation	5	16.84	6.85	41.37	16.88	6.85	41.57
Eleutherococcus senticosus	Atrial fibrillation	3	4.56	1.46	14.24	4.56	1.46	14.27
Aloe bargalensis	Blister	5	18.64	7.6	45.72	18.7	7.6	46
Eucalyptus globulus	Blister	4	11.88	4.39	32.12	11.91	4.39	32.28
Hypericum perfoliatum	Blister	3	7.94	2.53	24.89	7.95	2.53	24.98
Hypericum perforatum	Blister	3	7.94	2.53	24.89	7.95	2.53	24.98
Ginkgo biloba	Burning sensation	4	3.92	1.46	10.53	3.92	1.46	10.54
Silybum marianum	Burning sensation	4	4.18	1.56	11.23	4.18	1.55	11.25
Ananas comosus	Burning sensation	4	9.42	3.47	25.6	9.43	3.46	25.67
Eucalyptus globulus	Burning sensation	4	7.2	2.66	19.47	7.21	2.66	19.53
Capsicum annuum	Burning sensation	4	4.2	1.56	11.29	4.2	1.56	11.3
Capsicum baccatum	Burning sensation	4	4.2	1.56	11.29	4.2	1.56	11.3
Capsicum frutescens	Burning sensation	4	4.2	1.56	11.29	4.2	1.56	11.3
Panax quinquefolius	Burning sensation	3	3.32	1.06	10.37	3.32	1.06	10.39
Atropa belladonna	Migraine	3	3.76	1.2	11.74	3.76	1.2	11.76
Ananas comosus	Migraine	4	12.04	4.43	32.72	12.07	4.43	32.86
Ginkgo biloba	Migraine	5	6.29	2.6	15.24	6.3	2.59	15.3
Arctium lappa	Migraine	3	9.43	2.99	29.76	9.45	2.99	29.88
Panax ginseng	Migraine	5	3.44	1.43	8.3	3.45	1.43	8.34
Curcuma longa	Migraine	3	5.55	1.77	17.38	5.56	1.77	17.45
Curcuma zanthorrhiza	Migraine	3	15.16	4.75	48.39	15.18	4.75	48.54
Curcuma xanthorrhiza	Migraine	3	15.16	4.75	48.39	15.18	4.75	48.54
Zingiber officinale	Migraine	4	5.19	1.93	13.94	5.2	1.93	13.99
Urtica dioica	Migraine	3	32.65	9.89	107.78	32.7	9.89	108.13
Eleutherococcus senticosus	Migraine	3	4.16	1.33	12.99	4.17	1.33	13.05
Lepidium meyenii	Migraine	4	11.21	4.13	30.42	11.23	4.13	30.53
Tribulus terrestris	Migraine	4	21.36	7.74	58.96	21.4	7.74	59.19
Serenoa repens	Migraine	3	8.58	2.72	27.04	8.59	2.72	27.12
Olea europaea	Migraine	3	13.92	4.37	44.33	13.94	4.37	44.47
Citrus limon	Migraine	3	3.86	1.24	12.05	3.86	1.23	12.07
Hypericum perfoliatum	Palpitations	7	5.66	2.65	12.1	5.66	2.65	12.11
Hypericum perforatum	Palpitations	7	5.66	2.65	12.1	5.66	2.65	12.11
Aloe bargalensis	Palpitations	7	7.9	3.67	17.01	7.91	3.67	17.05
Panax ginseng	Palpitations	25	6.92	4.62	10.36	6.95	4.63	10.42
Zingiber officinale	Palpitations	15	7.85	4.65	13.25	7.87	4.66	13.3
Eleutherococcus senticosus	Palpitations	13	7.26	4.14	12.72	7.27	4.14	12.76
Schizonepeta tenuifolia	Palpitations	3	27.07	7.64	95.9	27.09	7.64	96.03
Ephedra sinica	Palpitations	9	12.34	6.2	24.58	12.36	6.2	24.65
Salvia alba	Palpitations	13	9.71	5.51	17.11	9.73	5.51	17.17
Salix alba	Palpitations	13	9.71	5.51	17.11	9.73	5.51	17.17
Paullinia cupana	Palpitations	18	18.56	11.27	30.58	18.63	11.29	30.74
Citrus aurantium	Palpitations	10	4.23	2.25	7.95	4.24	2.25	7.98
Rehmannia glutinosa	Palpitations	7	58.31	23.27	146.09	58.39	23.29	146.41
Ephedra sp	Palpitations	9	12.34	6.2	24.58	12.36	6.2	24.65
Garcinia gummi-gutta	Palpitations	8	10.83	5.24	22.39	10.84	5.24	22.43
Gymnema sylvestre	Palpitations	4	9.84	3.54	27.38	9.85	3.54	27.42
Taraxacum officinale	Palpitations	4	4.13	1.52	11.21	4.13	1.52	11.21
Taraxacum sp	Palpitations	3	3.38	1.07	10.66	3.39	1.07	10.7
Medicago sativa	Palpitations	4	4.05	1.49	10.98	4.05	1.49	10.99
Glycyrrhiza glabra	Palpitations	8	5.66	2.78	11.52	5.67	2.78	11.55
Althaea officinalis	Palpitations	14	9.19	5.33	15.85	9.21	5.33	15.9
Aloe africana	Palpitations	4	5.41	1.98	14.76	5.42	1.98	14.8
Aloe succotrina	Palpitations	4	4.66	1.71	12.67	4.66	1.71	12.68
Aloe vallaris	Palpitations	4	5.41	1.98	14.76	5.42	1.98	14.8
Aloe vera	Palpitations	7	6.95	3.24	14.92	6.96	3.24	14.95
Foeniculum vulgare	Palpitations	5	6.02	2.45	14.81	6.02	2.45	14.82
Cynara cardunculus	Palpitations	3	5.51	1.73	17.57	5.51	1.73	17.58
Silybum marianum	Palpitations	10	5.26	2.79	9.92	5.27	2.79	9.95
Arctium lappa	Palpitations	6	7.47	3.27	17.08	7.48	3.27	17.12
Curcuma longa	Palpitations	6	4.33	1.92	9.79	4.34	1.92	9.82
Curcuma zanthorrhiza	Palpitations	3	5.8	1.82	18.52	5.8	1.81	18.54
Curcuma xanthorrhiza	Palpitations	3	5.8	1.82	18.52	5.8	1.81	18.54
Camellia siangensis	Palpitations	19	6.75	4.25	10.72	6.77	4.26	10.77
Camellia sinensis	Palpitations	20	5.22	3.34	8.17	5.24	3.34	8.21
Ilex paraguariensis	Palpitations	9	15.47	7.7	31.09	15.5	7.7	31.18
Rhodiola rosea	Palpitations	5	6.52	2.65	16.07	6.53	2.65	16.11
Sedum griseum	Palpitations	5	6.94	2.81	17.13	6.95	2.81	17.17
Withania somnifera	Palpitations	7	7.08	3.3	15.2	7.09	3.3	15.24
Schisandra chinensis	Palpitations	5	8.08	3.26	20.04	8.09	3.26	20.08
Vitex agnus-castus	Palpitations	3	7.92	2.45	25.57	7.93	2.45	25.62
Lepidium meyenii	Palpitations	3	3.18	1.01	10.02	3.19	1.01	10.06
Piper nigrum	Palpitations	4	8.84	3.19	24.49	8.85	3.19	24.53
Cola acuminata	Palpitations	3	5.51	1.73	17.57	5.51	1.73	17.58
Calea acuminata	Palpitations	3	5.51	1.73	17.57	5.51	1.73	17.58
Plectranthus barbatus	Palpitations	3	10.83	3.31	35.48	10.83	3.3	35.5
Syzygium aromaticum	Palpitations	5	11.05	4.4	27.72	11.06	4.4	27.77
Fallopia multiflora	Palpitations	4	28.88	9.59	86.99	28.9	9.59	87.11
Angelica dahurica	Palpitations	3	108.29	21.86	536.41	108.35	21.86	536.97
Angelica pubescens	Palpitations	3	162.43	27.15	971.9	162.53	27.15	972.93
Attalea racemosa	Palpitations	3	4.33	1.37	13.73	4.33	1.37	13.73
Actaea cimicifuga	Palpitations	3	4.33	1.37	13.73	4.33	1.37	13.73
Actaea racemosa	Palpitations	3	4.33	1.37	13.73	4.33	1.37	13.73
Capsicum annuum	Palpitations	7	3.64	1.71	7.73	3.65	1.72	7.76
Passiflora incarnata	Palpitations	3	3.69	1.17	11.66	3.69	1.17	11.67
Vaccinium myrtillus	Palpitations	3	3.38	1.07	10.66	3.39	1.07	10.7
Zea mays	Palpitations	7	15.16	6.88	33.42	15.18	6.88	33.5
Valeriana officinalis	Palpitations	3	3.57	1.13	11.27	3.57	1.13	11.28
Tribulus terrestris	Palpitations	3	6.02	1.88	19.25	6.02	1.88	19.26
Acacia senegal	Palpitations	3	19.11	5.6	65.19	19.12	5.6	65.26
Saccharum officinarum	Palpitations	3	20.3	5.92	69.65	20.32	5.92	69.76
Panax quinquefolius	Palpitations	10	5.61	2.97	10.59	5.62	2.97	10.62
Bacopa monnieri	Palpitations	3	6.91	2.15	22.19	6.92	2.15	22.24
Lycium chilense	Palpitations	3	36.1	9.78	133.31	36.12	9.78	133.46
Lycium chinense	Palpitations	5	7.85	3.17	19.45	7.85	3.17	19.47
Serenoa repens	Palpitations	3	3.28	1.04	10.34	3.28	1.04	10.35
Coffea canephora	Palpitations	4	9.63	3.46	26.77	9.63	3.46	26.79
Cinnamomum verum	Palpitations	3	4.06	1.28	12.85	4.06	1.28	12.86
Citrus reticulata	Palpitations	9	7.38	3.76	14.49	7.39	3.76	14.53
Vaccinium macrocarpon	Hypoglycaemia	4	5.68	2.12	15.25	5.69	2.11	15.31
Panax quinquefolius	Hypoglycaemia	4	6.33	2.36	17.01	6.35	2.36	17.11
Camellia siangensis	Muscle twitching	3	4.47	1.44	13.91	4.48	1.44	13.99
Camellia sinensis	Muscle twitching	3	3.32	1.07	10.32	3.33	1.07	10.38
Eucalyptus globulus	Dehydration	3	4.21	1.34	13.23	4.21	1.34	13.24
Brassica oleracea	Dehydration	4	13.91	5.03	38.49	13.92	5.02	38.57
Medicago sativa	Dehydration	8	13.5	6.58	27.69	13.53	6.58	27.8
Panax ginseng	Dehydration	8	3.41	1.7	6.86	3.41	1.69	6.87
Curcuma longa	Dehydration	4	4.57	1.69	12.33	4.58	1.7	12.37
Aloe succotrina	Dehydration	4	7.48	2.75	20.34	7.48	2.75	20.36
Aloe vera	Dehydration	4	6.21	2.29	16.83	6.21	2.29	16.85
Eleutherococcus senticosus	Dehydration	7	6.08	2.86	12.91	6.1	2.87	12.97
Carica papaya	Dehydration	5	26.34	10.29	67.43	26.38	10.29	67.62
Foeniculum vulgare	Dehydration	3	5.67	1.8	17.9	5.67	1.79	17.92
Mentha piperita	Dehydration	3	6.95	2.19	22.03	6.96	2.19	22.08
Silybum marianum	Dehydration	4	3.28	1.22	8.81	3.28	1.22	8.83
Panax quinquefolius	Dehydration	6	5.29	2.35	11.91	5.3	2.35	11.95
Attalea racemosa	Dehydration	4	9.4	3.44	25.69	9.41	3.44	25.75
Actaea cimicifuga	Dehydration	4	9.4	3.44	25.69	9.41	3.44	25.75
Actaea racemosa	Dehydration	4	9.4	3.44	25.69	9.41	3.44	25.75
Cinnamomum verum	Dehydration	3	6.52	2.06	20.63	6.52	2.06	20.66
Rhodiola rosea	Dehydration	3	6.14	1.94	19.41	6.14	1.94	19.43
Sedum griseum	Dehydration	3	6.52	2.06	20.63	6.52	2.06	20.66
Plantago notata	Dehydration	3	5.99	1.9	18.93	6	1.9	18.98
Plantago ovata	Dehydration	3	5.99	1.9	18.93	6	1.9	18.98
Withania somnifera	Dehydration	4	6.32	2.33	17.13	6.33	2.33	17.18
Lepidium meyenii	Dehydration	4	6.88	2.53	18.68	6.89	2.54	18.73
Spinacia oleracea	Dehydration	3	20.86	6.3	69.05	20.88	6.3	69.19
Euterpe oleracea	Dehydration	3	16.3	4.99	53.2	16.31	4.99	53.29
Vitis vinifera	Dehydration	124	3.93	3.3	4.68	4.05	3.38	4.86
Linum usitatissimum	Dehydration	7	5.56	2.62	11.79	5.57	2.62	11.83
Garcinia mangostana	Dehydration	3	21.73	6.55	72.13	21.75	6.55	72.27
Punica granatum	Dehydration	4	10.86	3.96	29.8	10.88	3.96	29.9
Lycium barbarum	Dehydration	4	11.59	4.21	31.87	11.6	4.21	31.94
Chlorella vulgaris	Dehydration	3	12.72	3.94	41.06	12.73	3.94	41.13
Chlorella pyrenoidosa	Dehydration	3	12.72	3.94	41.06	12.73	3.94	41.13
Chlorella sp	Dehydration	3	12.72	3.94	41.06	12.73	3.94	41.13
Rhamnus purshiana	Generalised tonic-clonic seizure	3	5.27	1.69	16.42	5.28	1.69	16.5
Eucalyptus globulus	Generalised tonic-clonic seizure	3	11.65	3.71	36.56	11.68	3.71	36.77
Althaea officinalis	Generalised tonic-clonic seizure	3	8.21	2.63	25.66	8.23	2.62	25.8
Cannabis sativa	Generalised tonic-clonic seizure	8	3.92	1.96	7.84	3.94	1.96	7.92
Camellia siangensis	Generalised tonic-clonic seizure	3	4.5	1.45	14.01	4.51	1.44	14.08
Camellia sinensis	Generalised tonic-clonic seizure	3	3.34	1.07	10.38	3.35	1.07	10.44
Panax quinquefolius	Hypokinesia	4	15.66	5.84	42.02	15.75	5.84	42.5
Serenoa repens	Haemorrhage	4	8.15	3	22.13	8.16	3	22.19
Panax ginseng	Disturbance in attention	13	11.05	6.37	19.15	11.14	6.4	19.4
Silybum marianum	Disturbance in attention	3	4.83	1.55	15.08	4.83	1.54	15.11
Hypericum perfoliatum	Disturbance in attention	5	12.6	5.17	30.72	12.63	5.17	30.88
Hypericum perforatum	Disturbance in attention	5	12.6	5.17	30.72	12.63	5.17	30.88
Eleutherococcus senticosus	Disturbance in attention	4	6.75	2.51	18.14	6.77	2.51	18.24
Lepidium meyenii	Disturbance in attention	3	10.08	3.2	31.74	10.1	3.2	31.87
Zea mays	Disturbance in attention	3	19.04	5.96	60.83	19.07	5.96	61.06
Saccharum officinarum	Disturbance in attention	3	64.25	18.74	220.29	64.37	18.74	221.14
Paullinia cupana	Disturbance in attention	3	8.57	2.73	26.92	8.58	2.73	27.01
Valeriana officinalis	Disturbance in attention	4	15.23	5.6	41.41	15.27	5.6	41.62
Solanum dulcamara	Disturbance in attention	3	4.47	1.43	13.95	4.48	1.43	14.01
Robinia pseudoacacia	Disturbance in attention	4	52.72	18.42	150.89	52.85	18.42	151.61
Cannabis sativa	Euphoric mood	45	44.46	33.34	59.28	48.14	35.28	65.69
Oenothera biennis	Weight increased	4	3.29	1.21	8.92	3.29	1.21	8.93
Linum usitatissimum	Weight increased	8	3.26	1.61	6.6	3.27	1.61	6.62
Curcuma longa	Weight increased	7	4.18	1.96	8.92	4.18	1.96	8.92
Thymus vulgaris	Memory impairment	4	10.53	3.89	28.5	10.55	3.89	28.61
Curcuma longa	Memory impairment	3	6.04	1.93	18.92	6.05	1.93	18.99
Citrus grandis	Memory impairment	3	6.42	2.05	20.12	6.43	2.05	20.19
Taraxacum officinale	Memory impairment	3	8.72	2.77	27.44	8.73	2.77	27.53
Taraxacum sp	Memory impairment	3	9.63	3.05	30.36	9.64	3.05	30.45
Cannabis sativa	Memory impairment	13	4.09	2.37	7.05	4.12	2.38	7.14
Panax ginseng	Memory impairment	6	4.51	2.02	10.08	4.52	2.02	10.13
Zingiber officinale	Memory impairment	3	4.22	1.35	13.17	4.23	1.35	13.23
Piper nigrum	Memory impairment	3	18.48	5.77	59.19	18.51	5.77	59.4
Salvia alba	Memory impairment	3	5.96	1.9	18.66	5.97	1.9	18.73
Salix alba	Memory impairment	3	5.96	1.9	18.66	5.97	1.9	18.73
Paullinia cupana	Memory impairment	3	7.7	2.45	24.19	7.71	2.45	24.27
Schisandra chinensis	Memory impairment	3	13.39	4.22	42.5	13.41	4.22	42.64
Lycium barbarum	Weight decreased	3	3.31	1.04	10.55	3.31	1.04	10.55
Aloe succotrina	Weight decreased	6	4.44	1.94	10.14	4.44	1.94	10.15
Aloe vera	Weight decreased	6	3.67	1.61	8.34	3.67	1.61	8.35
Centella asiatica	Weight decreased	4	12.82	4.4	37.34	12.83	4.4	37.39
Linum usitatissimum	Weight decreased	11	3.44	1.88	6.3	3.45	1.88	6.33
Arabis vochinensis	Weight decreased	4	6.73	2.41	18.81	6.73	2.41	18.81
Aralia chinensis	Weight decreased	4	6.73	2.41	18.81	6.73	2.41	18.81
Angelica sinensis	Weight decreased	4	7.48	2.66	21.01	7.48	2.66	21.02
Acacia chiapensis	Weight decreased	4	6.73	2.41	18.81	6.73	2.41	18.81
Curcuma longa	Weight decreased	7	3.16	1.48	6.74	3.16	1.48	6.75
Curcuma zanthorrhiza	Weight decreased	6	7.62	3.28	17.72	7.62	3.27	17.73
Curcuma xanthorrhiza	Weight decreased	6	7.62	3.28	17.72	7.62	3.27	17.73
Vitex agnus-castus	Weight decreased	3	4.92	1.52	15.88	4.93	1.53	15.92
Petroselinum crispum	Weight decreased	3	4.12	1.28	13.22	4.12	1.28	13.22
Brassica oleracea	Weight decreased	3	3.96	1.24	12.69	3.96	1.24	12.69
Serenoa repens	Muscular weakness	5	8.7	3.54	21.36	8.71	3.54	21.41
Urtica dioica	Muscular weakness	3	19.47	5.9	64.29	19.49	5.9	64.43
Hypericum perfoliatum	Muscular weakness	3	3.67	1.17	11.51	3.67	1.17	11.53
Hypericum perforatum	Muscular weakness	3	3.67	1.17	11.51	3.67	1.17	11.53
Angelica archangelica	Muscular weakness	3	28.13	8.29	95.45	28.15	8.29	95.61
Calendula officinalis	Muscular weakness	3	14.47	4.45	47.02	14.48	4.45	47.11
Dimorphandra mollis	Muscular weakness	3	16.33	4.99	53.39	16.35	5	53.51
Valeriana officinalis	Muscular weakness	3	5.56	1.76	17.55	5.57	1.76	17.6
Cannabis sativa	Thinking abnormal	5	4.73	1.97	11.35	4.76	1.97	11.51
Cannabis sativa	Mental impairment	3	3.14	1.01	9.72	3.16	1.01	9.85
Plantago asiatica	Speech disorder	19	3.02	1.93	4.74	3.04	1.93	4.79
Cannabis sativa	Speech disorder	12	3.5	1.98	6.17	3.52	1.99	6.23
Silybum marianum	Speech disorder	3	4.02	1.29	12.55	4.03	1.29	12.61
Valeriana officinalis	Nightmare	5	22.39	9.11	55.03	22.47	9.11	55.4
Silybum marianum	Nightmare	3	5.61	1.8	17.51	5.62	1.8	17.59
Serenoa repens	Nightmare	3	12.08	3.83	38.05	12.1	3.83	38.21
[truncated: 601 more rows]

## Sheet: CVAR-SOC
HERB	SOC	COUNT	PRR	PRR_LCI	PRR_UCI	ROR	ROR_LCI	ROR_UCI
Strychnos toxifera	Vascular disorders	12	4.05	2.52	6.52	5.31	2.71	10.41
Strychnos toxifera	Cardiac disorders	8	3.43	1.84	6.39	4.02	1.86	8.7
Digitaria purpurea	Cardiac disorders	26	4.72	3.4	6.56	6.08	3.88	9.53
Digitaria purpurea	Metabolism and nutrition disorders	14	3.2	1.97	5.2	3.57	2.03	6.29
Digitaria purpurea	Renal and urinary disorders	11	3.4	1.95	5.93	3.71	1.98	6.95
Digitalis purpurea	Cardiac disorders	26	4.72	3.4	6.56	6.08	3.88	9.53
Digitalis purpurea	Metabolism and nutrition disorders	14	3.2	1.97	5.2	3.57	2.03	6.29
Digitalis purpurea	Renal and urinary disorders	11	3.4	1.95	5.93	3.71	1.98	6.95
Chondrus crispus	Gastrointestinal disorders	7	4.15	3.19	5.39	26.17	3.22	212.71
Ananas comosus	Ear and labyrinth disorders	5	4.33	1.84	10.17	4.51	1.83	11.09
Styrax paralleloneurum	Skin and subcutaneous tissue disorders	19	3.75	3.01	4.67	12.47	4.98	31.22
Avena sativa	Skin and subcutaneous tissue disorders	209	3.83	3.59	4.09	13.52	10.16	17.98
Avena sp	Skin and subcutaneous tissue disorders	189	4.27	4.05	4.5	24.85	16.9	36.53
Avena sativa	Skin and subcutaneous tissue disorders	209	3.87	3.63	4.12	14.22	10.63	19.02
Cannabis sativa	Psychiatric disorders	526	5.17	4.87	5.48	9.89	8.73	11.21
Cannabis sativa	Social circumstances	53	7.96	6.11	10.36	8.35	6.32	11.03
Aloe bargalensis	Ear and labyrinth disorders	4	3.29	1.26	8.6	3.39	1.25	9.21
Drimia maritima	Skin and subcutaneous tissue disorders	9	3.42	2.38	4.91	8.86	2.73	28.77
Ambrosia artemisiifolia	Immune system disorders	7	5.64	2.89	11.01	6.68	2.94	15.17
Carthamus tinctorius	Blood and lymphatic system disorders	7	3.21	1.6	6.45	3.49	1.59	7.66
Harpagophytum procumbens	Blood and lymphatic system disorders	6	3.34	1.57	7.08	3.65	1.56	8.56
Cynara cardunculus	Hepatobiliary disorders	10	8.84	5.01	15.6	10.35	5.26	20.37
Achillea millefolium	Metabolism and nutrition disorders	5	3.26	1.45	7.33	3.65	1.41	9.43
Oenothera biennis	Reproductive system and breast disorders	8	3.39	1.74	6.61	3.57	1.74	7.33
Centella asiatica	Investigations	11	3.45	2.22	5.37	5.37	2.44	11.83
Centella asiatica	Hepatobiliary disorders	4	8.76	3.57	21.51	10.24	3.51	29.84
Centella asiatica	Renal and urinary disorders	4	4.8	1.95	11.79	5.52	1.89	16.08
Centella asiatica	Metabolism and nutrition disorders	6	5.32	2.65	10.69	6.68	2.67	16.73
Valeriana officinalis	Psychiatric disorders	32	3.29	2.48	4.36	4.48	2.92	6.86
Scutellaria lateriflora	Hepatobiliary disorders	5	10.14	4.6	22.38	12.22	4.63	32.28
Humulus lupulus	Psychiatric disorders	14	3.66	2.42	5.53	5.28	2.72	10.26
Teucrium scorodonia	Hepatobiliary disorders	4	31.3	16.47	59.47	71.7	16.04	320.41
Teucrium scorodonia	Investigations	3	3.36	1.43	7.9	5.13	1.15	22.92
Anthoxanthum odoratum	Respiratory, thoracic and mediastinal disorders	6	7	4.69	10.44	25	5.05	123.87
Cynodon dactylon	Respiratory, thoracic and mediastinal disorders	5	7.78	5.44	11.13	41.67	4.87	356.69
Dactylis glomerata	Respiratory, thoracic and mediastinal disorders	11	5.7	3.94	8.24	13.1	5.08	33.79
Dactylis glomerata	Immune system disorders	7	11.9	6.67	21.24	18.84	7.3	48.61
Lolium perenne	Respiratory, thoracic and mediastinal disorders	5	7.78	5.44	11.13	41.67	4.87	356.69
Poa pratensis	Respiratory, thoracic and mediastinal disorders	10	6.22	4.35	8.9	16.67	5.7	48.77
Poa pratensis	Immune system disorders	6	12.24	6.58	22.75	19.74	7.03	55.47
Ephedra sinica	Cardiac disorders	25	5	3.59	6.97	6.59	4.15	10.47
Asclepias tuberosa	Immune system disorders	3	22.95	13.03	40.42	88.8	9.24	853.76
Asclepias tuberosa	Nervous system disorders	3	3.87	2.2	6.81	12.47	1.3	119.89
Calendula officinalis	Psychiatric disorders	13	3.31	2.13	5.14	4.51	2.31	8.82
Ephedra sp	Cardiac disorders	25	5	3.59	6.97	6.59	4.15	10.47
Juniperus communis	Hepatobiliary disorders	5	4.49	1.94	10.4	4.8	1.92	11.99
Thymus vulgaris	Injury, poisoning and procedural complications	48	4.02	3.23	5.01	6.01	4.17	8.65
Smilax cognata	Nervous system disorders	4	3.44	1.95	6.06	8.31	1.52	45.37
Smilax ocreata	Nervous system disorders	4	3.44	1.95	6.06	8.31	1.52	45.37
Passiflora incarnata	Hepatobiliary disorders	5	3.01	1.28	7.06	3.13	1.27	7.71
Rosa canina	Hepatobiliary disorders	3	4.11	1.38	12.21	4.36	1.34	14.14
Taraxacum officinale	Hepatobiliary disorders	10	5.03	2.79	9.08	5.43	2.83	10.41
Taraxacum sp	Hepatobiliary disorders	10	5.54	3.08	9.97	6.04	3.14	11.62
Lavandula angustifolia	Psychiatric disorders	8	3.68	2.13	6.35	5.33	2.21	12.86
Lavandula angustifolia	Injury, poisoning and procedural complications	7	3.38	1.85	6.19	4.57	1.84	11.32
Lavandula angustifolia	Metabolism and nutrition disorders	3	3.16	1.11	9.01	3.52	1.04	11.95
Lavandula angustifolia	Eye disorders	3	3.21	1.13	9.15	3.58	1.05	12.15
Vitex agnus-castus	Reproductive system and breast disorders	5	5.39	2.36	12.3	5.95	2.34	15.1
Vitex agnus-castus	Hepatobiliary disorders	4	4.98	1.96	12.68	5.38	1.92	15.04
Salvia alba	Cardiac disorders	35	3.9	2.91	5.23	4.72	3.24	6.87
Salix alba	Cardiac disorders	35	3.9	2.91	5.23	4.72	3.24	6.87
Hypericum perfoliatum	Psychiatric disorders	50	3.43	2.74	4.29	4.77	3.38	6.74
Hypericum perfoliatum	Endocrine disorders	3	5	1.63	15.33	5.08	1.62	15.96
Hypericum perforatum	Psychiatric disorders	50	3.43	2.74	4.29	4.77	3.38	6.74
Hypericum perforatum	Endocrine disorders	3	5	1.63	15.33	5.08	1.62	15.96
Angelica dahurica	Cardiac disorders	4	11.72	6.66	20.64	33.17	6.08	181.11
Angelica pubescens	Cardiac disorders	3	10.55	5.16	21.58	24.88	4.16	148.91
Silybum marianum	Hepatobiliary disorders	18	4.57	2.94	7.12	4.89	3.02	7.93
Arctium lappa	Hepatobiliary disorders	9	5.3	2.85	9.86	5.76	2.9	11.46
Arctium tomentosum	Musculoskeletal and connective tissue disorders	3	3.59	1.47	8.78	5.15	1.23	21.55
Curcuma longa	Hepatobiliary disorders	14	4.92	2.98	8.11	5.31	3.07	9.2
Curcuma zanthorrhiza	Eye disorders	10	3.81	2.17	6.7	4.38	2.22	8.65
Curcuma zanthorrhiza	Hepatobiliary disorders	5	4.64	2.01	10.74	4.98	1.99	12.45
Curcuma zanthorrhiza	Metabolism and nutrition disorders	8	3	1.57	5.71	3.32	1.58	7
Curcuma zanthorrhiza	Vascular disorders	14	3.28	2.08	5.18	4	2.2	7.29
Yucca schidigera	Immune system disorders	6	4.08	1.94	8.59	4.55	1.93	10.75
Curcuma xanthorrhiza	Eye disorders	10	3.81	2.17	6.7	4.38	2.22	8.65
Curcuma xanthorrhiza	Hepatobiliary disorders	5	4.64	2.01	10.74	4.98	1.99	12.45
Curcuma xanthorrhiza	Metabolism and nutrition disorders	8	3	1.57	5.71	3.32	1.58	7
Curcuma xanthorrhiza	Vascular disorders	14	3.28	2.08	5.18	4	2.2	7.29
Garcinia gummi-gutta	Cardiac disorders	16	3.2	2.05	4.99	3.69	2.15	6.34
Galium aparine	Investigations	4	3.92	1.96	7.84	6.83	1.71	27.31
Hydrastis canadensis	Metabolism and nutrition disorders	5	3.16	1.4	7.11	3.52	1.37	9.07
Arabis vochinensis	Reproductive system and breast disorders	6	6.47	3.08	13.61	7.33	3.1	17.34
Aralia chinensis	Reproductive system and breast disorders	6	6.47	3.08	13.61	7.33	3.1	17.34
Rehmannia glutinosa	Renal and urinary disorders	3	4.5	1.59	12.77	5.12	1.5	17.47
Rehmannia glutinosa	Cardiac disorders	7	6.16	3.39	11.19	8.93	3.56	22.38
Angelica sinensis	Reproductive system and breast disorders	5	5.93	2.61	13.47	6.63	2.6	16.93
Angelica sinensis	Hepatobiliary disorders	3	4.11	1.38	12.21	4.36	1.34	14.14
Acacia chiapensis	Reproductive system and breast disorders	6	6.47	3.08	13.61	7.33	3.1	17.34
Vitis vinifera	Metabolism and nutrition disorders	851	3.44	3.23	3.66	3.88	3.6	4.18
Citrullus lanatus	Gastrointestinal disorders	9	3.88	2.94	5.13	16.83	3.64	77.9
Citrullus lanatus	Vascular disorders	3	3.77	1.44	9.9	4.82	1.28	18.17
Serenoa repens	Renal and urinary disorders	11	3.24	1.85	5.66	3.51	1.88	6.56
Serenoa repens	Reproductive system and breast disorders	7	3.25	1.59	6.64	3.42	1.59	7.37
Paullinia cupana	Cardiac disorders	33	4.72	3.52	6.32	6.09	4.09	9.08
Ptychopetalum olacoides	Investigations	4	3.13	1.47	6.69	4.56	1.29	16.16
Ptychopetalum olacoides	Vascular disorders	3	4.15	1.61	10.7	5.5	1.42	21.27
Ptychopetalum olacoides	Renal and urinary disorders	3	9	3.49	23.2	12.43	3.21	48.07
Ptychopetalum olacoides	Injury, poisoning and procedural complications	3	3.04	1.18	7.84	3.91	1.01	15.12
Piper methysticum	Hepatobiliary disorders	4	8.76	3.57	21.51	10.24	3.51	29.84
Piper methysticum	Renal and urinary disorders	3	3.6	1.25	10.41	3.95	1.18	13.2
Mentha spicata	Hepatobiliary disorders	3	3.57	1.2	10.66	3.75	1.16	12.09
Petroselinum crispum	Hepatobiliary disorders	3	3.16	1.05	9.48	3.29	1.03	10.56
Althaea officinalis	Cardiac disorders	39	3.83	2.9	5.06	4.62	3.24	6.59
Salvia purpurea	Cardiac disorders	4	4.14	1.76	9.75	5.1	1.66	15.64
Sabia purpurea	Cardiac disorders	4	4.14	1.76	9.75	5.1	1.66	15.64
Salix purpurea	Cardiac disorders	4	4.14	1.76	9.75	5.1	1.66	15.64
Lythrum salicaria	Cardiac disorders	4	4.14	1.76	9.75	5.1	1.66	15.64
Zea mays	Cardiac disorders	10	3.09	1.76	5.43	3.53	1.78	6.99
Rosmarinus officinalis	Hepatobiliary disorders	4	6.44	2.56	16.17	7.17	2.53	20.36
Rosmarinus officinalis	Eye disorders	5	3.31	1.47	7.44	3.7	1.43	9.56
Melissa officinalis	Hepatobiliary disorders	3	4.11	1.38	12.21	4.36	1.34	14.14
Glycyrrhiza glabra	Endocrine disorders	3	4.38	1.43	13.45	4.44	1.42	13.93
Paeonia suffruticosa	Investigations	3	3.92	1.76	8.73	6.83	1.38	33.84
Cola acuminata	Cardiac disorders	14	3.97	2.5	6.3	4.84	2.67	8.78
Calea acuminata	Cardiac disorders	14	3.97	2.5	6.3	4.84	2.67	8.78
Mentha canadensis	Product issues	7	7.82	4.1	14.91	9.99	4.27	23.39
Rubus idaeus	Reproductive system and breast disorders	4	5.93	2.37	14.83	6.63	2.33	18.91
Ilex paraguariensis	Cardiac disorders	21	5.13	3.58	7.35	6.83	4.11	11.35
Ilex paraguariensis	Hepatobiliary disorders	4	3.04	1.17	7.88	3.16	1.15	8.66
Peumus boldus	Investigations	10	4.12	2.69	6.31	7.59	3.08	18.68
Peumus boldus	Hepatobiliary disorders	4	11.53	4.83	27.55	14.34	4.76	43.21
Cynara scolymus	Hepatobiliary disorders	10	8.84	5.01	15.6	10.35	5.26	20.37
Attalea racemosa	Reproductive system and breast disorders	6	3.65	1.69	7.88	3.87	1.68	8.9
Attalea racemosa	Metabolism and nutrition disorders	11	3.12	1.8	5.4	3.47	1.83	6.57
Attalea racemosa	Hepatobiliary disorders	5	3.51	1.5	8.2	3.68	1.49	9.11
Actaea cimicifuga	Reproductive system and breast disorders	6	3.65	1.69	7.88	3.87	1.68	8.9
Actaea cimicifuga	Metabolism and nutrition disorders	11	3.12	1.8	5.4	3.47	1.83	6.57
Actaea cimicifuga	Hepatobiliary disorders	5	3.51	1.5	8.2	3.68	1.49	9.11
Actaea racemosa	Reproductive system and breast disorders	6	3.65	1.69	7.88	3.87	1.68	8.9
Actaea racemosa	Metabolism and nutrition disorders	11	3.12	1.8	5.4	3.47	1.83	6.57
Actaea racemosa	Hepatobiliary disorders	5	3.51	1.5	8.2	3.68	1.49	9.11
Larrea tridentata	Investigations	3	3.36	1.43	7.9	5.13	1.15	22.92
Arachis hypogaea	Immune system disorders	3	5.4	1.93	15.08	6.34	1.82	22.06
Arachis hypogaea	Respiratory, thoracic and mediastinal disorders	6	3.29	1.73	6.26	4.55	1.68	12.3
Uncaria tomentosa	Cardiac disorders	5	3.66	1.68	7.98	4.36	1.63	11.68
Cissus nobilis	Psychiatric disorders	3	4.14	1.76	9.74	6.5	1.45	29.04
Cissus nobilis	Gastrointestinal disorders	5	3.38	2.12	5.4	9.35	1.81	48.19
Eriobotrya japonica	Psychiatric disorders	3	4.83	2.17	10.75	8.67	1.75	42.96
Citrus reticulata	Ear and labyrinth disorders	5	3.01	1.27	7.12	3.08	1.26	7.52
Citrus tangerina	Psychiatric disorders	3	4.14	1.76	9.74	6.5	1.45	29.04
Citrus tangerina	Gastrointestinal disorders	5	3.38	2.12	5.4	9.35	1.81	48.19
Citrus nobilis	Ear and labyrinth disorders	5	3.1	1.31	7.33	3.18	1.3	7.77
Citrus unshiu	Psychiatric disorders	3	4.14	1.76	9.74	6.5	1.45	29.04
Citrus unshiu	Gastrointestinal disorders	5	3.38	2.12	5.4	9.35	1.81	48.19
Citrus aurantium	Metabolism and nutrition disorders	47	3.92	3.02	5.08	4.54	3.31	6.22
Sida cordifolia	Psychiatric disorders	5	3.45	1.71	6.97	4.82	1.62	14.38
Sida cordifolia	Cardiac disorders	6	7.54	4.12	13.81	12.44	4.32	35.86
Mentha arvensis	Psychiatric disorders	9	3	1.74	5.16	3.9	1.78	8.57
Mentha arvensis	Product issues	7	7.82	4.1	14.91	9.99	4.27	23.39
Scutellaria baicalensis	Gastrointestinal disorders	6	3.16	1.99	5.02	7.48	1.87	29.91
Ligusticum canadense	Psychiatric disorders	3	7.25	4.12	12.77	26	2.7	249.97
Levisticum officinale	Psychiatric disorders	3	5.8	2.84	11.86	13	2.17	77.8
Schizonepeta tenuifolia	Cardiac disorders	5	5.86	2.86	11.99	8.29	2.83	24.26
Rhodiola rosea	Hepatobiliary disorders	6	3.73	1.72	8.08	3.94	1.72	9.03
Epimedium sagittatum	Investigations	3	3.36	1.43	7.9	5.13	1.15	22.92
Fallopia multiflora	Psychiatric disorders	6	3.05	1.57	5.91	4	1.52	10.52
Fallopia multiflora	Cardiac disorders	6	5.55	2.86	10.76	7.66	2.91	20.15
Fallopia multiflora	Metabolism and nutrition disorders	3	3.5	1.24	9.89	3.96	1.15	13.59
Equisetum arvense	Renal and urinary disorders	5	3.57	1.57	8.13	3.92	1.54	9.98
Urtica dioica	Psychiatric disorders	9	3	1.74	5.16	3.9	1.78	8.57
Urtica dioica	Renal and urinary disorders	3	3.1	1.06	9.05	3.35	1.01	11.07
Malus sp	Metabolism and nutrition disorders	9	5.11	2.88	9.06	6.34	3.01	13.36
Piper nigrum	Cardiac disorders	11	3.65	2.16	6.18	4.34	2.23	8.43
Piper nigrum	Hepatobiliary disorders	3	3.1	1.03	9.31	3.23	1.01	10.36
Tanacetum vulgare	Psychiatric disorders	8	4.83	2.96	7.88	8.67	3.25	23.1
Inula helenium	Psychiatric disorders	3	3.22	1.28	8.11	4.33	1.08	17.31
Dioscorea villosa	Reproductive system and breast disorders	5	7.18	3.2	16.1	8.29	3.2	21.47
Dioscorea villosa	Hepatobiliary disorders	3	4.98	1.69	14.65	5.38	1.64	17.63
Centaurea benedicta	Investigations	7	3.92	2.32	6.62	6.83	2.4	19.47
Eucommia ulmoides	Nervous system disorders	4	3.44	1.95	6.06	8.31	1.52	45.37
Polygonatum multiflorum	Respiratory, thoracic and mediastinal disorders	3	4	1.7	9.41	6.25	1.4	27.93
Polygonatum multiflorum	Hepatobiliary disorders	3	23.47	9.98	55.22	40.33	9.02	180.22
Nigella sativa	Nervous system disorders	3	3.09	1.51	6.32	6.23	1.04	37.29
Melaleuca alternifolia	Injury, poisoning and procedural complications	38	5	3.99	6.27	8.91	5.7	13.93
Melaleuca alternifolia	Respiratory, thoracic and mediastinal disorders	25	3.03	2.2	4.18	4.01	2.49	6.46
Melaleuca lutea	Eye disorders	9	3.32	1.82	6.07	3.72	1.83	7.55
Melaleuca lutea	Injury, poisoning and procedural complications	29	4.82	3.7	6.27	8.28	5.01	13.69
Brassica napus	Musculoskeletal and connective tissue disorders	5	5.32	2.97	9.54	10.73	2.88	39.96
Carica papaya	Metabolism and nutrition disorders	7	4.08	2.09	7.97	4.77	2.1	10.83
Illicium verum	Psychiatric disorders	3	3.63	1.48	8.88	5.2	1.24	21.76
Leonurus cardiaca	Respiratory, thoracic and mediastinal disorders	5	3.89	1.99	7.6	5.95	1.89	18.75
Berberis aquifolium	Investigations	4	4.48	2.36	8.51	9.11	2.04	40.71
Viburnum opulus	Respiratory, thoracic and mediastinal disorders	3	3.11	1.23	7.84	4.17	1.04	16.67
Anemone uralensis	Vascular disorders	4	3.26	1.38	7.68	3.95	1.29	12.11
Pulsatilla pratensis	Vascular disorders	4	3.26	1.38	7.68	3.95	1.29	12.11
Anemone pulsatilla	Vascular disorders	4	3.26	1.38	7.68	3.95	1.29	12.11
Bacopa monnieri	Immune system disorders	5	3.06	1.33	7.03	3.29	1.31	8.29
Bacopa monnieri	Renal and urinary disorders	5	3	1.31	6.89	3.22	1.28	8.11
Withania somnifera	Hepatobiliary disorders	7	3.36	1.64	6.89	3.52	1.64	7.56
Plectranthus barbatus	Cardiac disorders	6	3.2	1.55	6.6	3.69	1.52	8.94
Plectranthus barbatus	Hepatobiliary disorders	3	4.98	1.69	14.65	5.38	1.64	17.63
Phyllanthus emblica	Hepatobiliary disorders	4	4.38	1.71	11.21	4.68	1.68	13
Terminalia chebula	Hepatobiliary disorders	4	4.47	1.75	11.44	4.78	1.72	13.29
Terminalia bellirica	Hepatobiliary disorders	4	4.3	1.68	11.02	4.58	1.65	12.71
Cuminum cyminum	Skin and subcutaneous tissue disorders	3	3.7	2.1	6.52	11.82	1.23	113.64
Rheum palmatum	Metabolism and nutrition disorders	4	3.16	1.28	7.83	3.52	1.22	10.15
Echinacea pallida	Cardiac disorders	3	3.77	1.38	10.28	4.52	1.26	16.2
Lomatium dissectum	Respiratory, thoracic and mediastinal disorders	3	4.67	2.1	10.4	8.33	1.68	41.27
Ulmus rubra	Hepatobiliary disorders	3	5.67	1.94	16.56	6.2	1.88	20.49
Origanum vulgare	Injury, poisoning and procedural complications	18	3.32	2.27	4.85	4.44	2.53	7.8
Origanum vulgare	Eye disorders	8	3.27	1.72	6.21	3.66	1.73	7.75
Origanum vulgare	Ear and labyrinth disorders	3	4.63	1.54	13.92	4.84	1.51	15.5
Allium cepa	Vascular disorders	4	3.46	1.48	8.09	4.28	1.38	13.27
Podophyllum peltatum	Nervous system disorders	5	4.3	3.01	6.15	20.78	2.43	177.87
Podophyllum peltatum	Musculoskeletal and connective tissue disorders	3	4.79	2.15	10.66	8.58	1.73	42.51
Veronica officinalis	Gastrointestinal disorders	3	3.55	2.02	6.25	11.22	1.17	107.87
Ferula assa-foetida	Nervous system disorders	3	3.87	2.2	6.81	12.47	1.3	119.89
Sesamum indicum	Nervous system disorders	4	4.12	2.66	6.39	16.62	1.86	148.7
Helianthus annuus	Product issues	3	4.41	1.54	12.62	4.95	1.46	16.73
Helianthus annuus	Respiratory, thoracic and mediastinal disorders	8	3.39	1.95	5.89	4.76	2	11.35
Helianthus annuus	Immune system disorders	4	5.56	2.29	13.49	6.58	2.23	19.44
Prunus serotina	Investigations	3	3.36	1.43	7.9	5.13	1.15	22.92
Prunus virginiana	Investigations	3	3.36	1.43	7.9	5.13	1.15	22.92
Echinacea purpurea	Renal and urinary disorders	3	3.21	1.1	9.35	3.48	1.05	11.53
Echinacea purpurea	Immune system disorders	4	4.37	1.76	10.83	4.93	1.71	14.21
Olea europaea	Product issues	6	3.04	1.42	6.51	3.25	1.4	7.53
Eurycoma longifolia	Investigations	3	3.36	1.43	7.9	5.13	1.15	22.92
Spinacia oleracea	Gastrointestinal disorders	23	3.89	3.27	4.62	17.2	6.54	45.24
Acacia senegal	Cardiac disorders	6	5.28	2.7	10.31	7.11	2.73	18.5
Lepidium meyenii	Hepatobiliary disorders	6	3.13	1.44	6.81	3.26	1.43	7.43
Piper longum	Investigations	4	4.48	2.36	8.51	9.11	2.04	40.71
Piper oblongum	Investigations	4	4.48	2.36	8.51	9.11	2.04	40.71
Ziziphus jujuba	Psychiatric disorders	9	4.14	2.53	6.78	6.5	2.74	15.43
Gynostemma pentaphyllum	Investigations	3	5.88	3.34	10.35	20.5	2.13	197.09
Gynostemma pentaphyllum	Nervous system disorders	3	3.87	2.2	6.81	12.47	1.3	119.89
Ziziphus sp	Cardiac disorders	3	3.3	1.19	9.15	3.83	1.09	13.44
Ziziphus sp	Psychiatric disorders	7	4.23	2.43	7.37	6.74	2.51	18.1
Prunus americana	Renal and urinary disorders	4	3.08	1.22	7.79	3.31	1.18	9.31
Pygeum africanum	Renal and urinary disorders	3	4.74	1.68	13.39	5.44	1.58	18.67
Prunus africana	Renal and urinary disorders	3	4.74	1.68	13.39	5.44	1.58	18.67
Aconitum balfourii	Vascular disorders	4	3.95	1.73	9.04	5.14	1.61	16.39
Aconitum balfourii	Renal and urinary disorders	3	6.43	2.36	17.53	7.91	2.21	28.36
Aconitum balfourii	Psychiatric disorders	5	3.45	1.71	6.97	4.82	1.62	14.38
Aconitum napellus	Immune system disorders	3	4.17	1.46	11.94	4.67	1.38	15.78
Aconitum napellus	Vascular disorders	5	3.15	1.46	6.81	3.78	1.39	10.25
Aconitum napellus	Investigations	11	3.92	2.58	5.95	6.83	2.96	15.75
Aconitum napellus	Renal and urinary disorders	4	5.45	2.25	13.23	6.44	2.18	19.03
Symphytum officinale	Musculoskeletal and connective tissue disorders	5	3	1.45	6.21	3.9	1.35	11.23
Symphytum officinale	Vascular disorders	5	4.33	2.09	8.96	5.84	2.03	16.81
Symphytum officinale	Psychiatric disorders	5	3.02	1.46	6.25	3.94	1.37	11.34
Arnica montana	Immune system disorders	3	3.06	1.05	8.95	3.29	1	10.85
Arnica montana	Renal and urinary disorders	4	4	1.61	9.96	4.46	1.56	12.78
Asparagus cochinchinensis	Gastrointestinal disorders	3	3.55	2.02	6.25	11.22	1.17	107.87
Liriope spicata	Gastrointestinal disorders	3	3.55	2.02	6.25	11.22	1.17	107.87
Ophiopogon japonicus	Gastrointestinal disorders	3	3.55	2.02	6.25	11.22	1.17	107.87
Saccharum officinarum	Cardiac disorders	5	4.63	2.18	9.83	5.92	2.13	16.44
Saccharum officinarum	Psychiatric disorders	6	3.05	1.57	5.91	4	1.52	10.52
Fraxinus excelsior	Nervous system disorders	3	3.87	2.2	6.81	12.47	1.3	119.89
Commiphora wightii	Reproductive system and breast disorders	3	4.44	1.51	13.04	4.8	1.46	15.76
Nepeta cataria	Cardiac disorders	6	5.86	3.05	11.26	8.29	3.11	22.09
Equisetum hyemale	Renal and urinary disorders	3	3.21	1.1	9.35	3.48	1.05	11.53
Urtica ardens	Gastrointestinal disorders	4	3.16	1.79	5.56	7.48	1.37	40.84
Urtica urens	Gastrointestinal disorders	4	3.16	1.79	5.56	7.48	1.37	40.84
Juglans regia	Gastrointestinal disorders	3	3.55	2.02	6.25	11.22	1.17	107.87
Gentiana lutea	Renal and urinary disorders	3	6	2.18	16.51	7.25	2.05	25.69
Chamaecrista dimidiata	Psychiatric disorders	3	5.8	2.84	11.86	13	2.17	77.8
Chamaecrista dimidiata	Nervous system disorders	3	3.09	1.51	6.32	6.23	1.04	37.29
Hedera canariensis	Immune system disorders	3	5.74	2.07	15.92	6.83	1.95	23.97
Hedera helix	Immune system disorders	3	5.74	2.07	15.92	6.83	1.95	23.97
Aconitum carmichaeli	Nervous system disorders	3	3.09	1.51	6.32	6.23	1.04	37.29
Embelia ribes	Nervous system disorders	3	3.09	1.51	6.32	6.23	1.04	37.29
Aconitum carmichaelii	Nervous system disorders	3	3.09	1.51	6.32	6.23	1.04	37.29
Azadirachta indica	Gastrointestinal disorders	10	3.16	2.21	4.52	7.48	2.56	21.88
Angelica archangelica	Eye disorders	3	3.21	1.13	9.15	3.58	1.05	12.15
Angelica archangelica	Musculoskeletal and connective tissue disorders	7	3.19	1.74	5.84	4.29	1.73	10.63
Schoenocaulon officinale	Vascular disorders	3	6.92	3.11	15.4	12.84	2.59	63.62
Gelsemium sempervirens	Vascular disorders	4	5.54	2.59	11.84	8.56	2.42	30.34
Hyssopus officinalis	Gastrointestinal disorders	21	3.11	2.42	4	7.14	3.44	14.81
Hyssopus officinalis	Metabolism and nutrition disorders	6	4.15	2.02	8.54	4.88	2.01	11.86
Hebanthe eriantha	Metabolism and nutrition disorders	3	3.16	1.11	9.01	3.52	1.04	11.95
Hebanthe eriantha	Cardiac disorders	4	3.35	1.39	8.09	3.9	1.31	11.59
Citrus sinensis	Skin and subcutaneous tissue disorders	39	3.63	3.09	4.27	10.98	5.96	20.22
Tilia sp	Nervous system disorders	5	4.3	3.01	6.15	20.78	2.43	177.87
Andrographis paniculata	Nervous system disorders	4	4.12	2.66	6.39	16.62	1.86	148.7
Chelidonium majus	Hepatobiliary disorders	4	14.61	6.31	33.82	19.55	6.22	61.41
Phellodendron amurense	Skin and subcutaneous tissue disorders	3	3.7	2.1	6.52	11.82	1.23	113.64
Valeriana mexicana	Psychiatric disorders	5	3.72	1.87	7.4	5.42	1.77	16.57
Vaccinium angustifolium	Reproductive system and breast disorders	3	7.11	2.5	20.19	8.19	2.4	27.95
Vaccinium stenophyllum	Reproductive system and breast disorders	3	7.11	2.5	20.19	8.19	2.4	27.95
Annona muricata	Investigations	3	5.88	3.34	10.35	20.5	2.13	197.09
Momordica charantia	Investigations	3	3.36	1.43	7.9	5.13	1.15	22.92
Momordica charantia	Gastrointestinal disorders	5	3.38	2.12	5.4	9.35	1.81	48.19
Jateorhiza palmata	Skin and subcutaneous tissue disorders	4	3.95	2.55	6.12	15.75	1.76	140.92
Viola arvensis	Investigations	4	5.22	2.96	9.19	13.67	2.5	74.64
Viola auricolor	Psychiatric disorders	3	7.25	4.12	12.77	26	2.7	249.97
Viola tricolor	Psychiatric disorders	3	7.25	4.12	12.77	26	2.7	249.97
Phleum pratense	Immune system disorders	11	12.47	7.91	19.66	20.36	9.45	43.88
Prunus cerasus	Investigations	3	4.7	2.3	9.61	10.25	1.71	61.35
Garcinia mangostana	Metabolism and nutrition disorders	4	3.28	1.33	8.1	3.68	1.27	10.64
Garcinia mangostana	Gastrointestinal disorders	23	4.04	3.45	4.73	21.5	7.44	62.17
Nelumbo nucifera	Nervous system disorders	3	3.87	2.2	6.81	12.47	1.3	119.89
Nelumbo nucifera	Psychiatric disorders	3	7.25	4.12	12.77	26	2.7	249.97
Cuscuta chilensis	Nervous system disorders	3	3.09	1.51	6.32	6.23	1.04	37.29
Cuscuta chilensis	Renal and urinary disorders	3	18	8.8	36.83	43.49	7.27	260.3
Cuscuta chinensis	Nervous system disorders	3	3.09	1.51	6.32	6.23	1.04	37.29
Cuscuta chinensis	Renal and urinary disorders	3	18	8.8	36.83	43.49	7.27	260.3
Eupatorium perfoliatum	Gastrointestinal disorders	3	3.55	2.02	6.25	11.22	1.17	107.87
Morus alba	Investigations	9	4.7	3.11	7.11	10.25	3.65	28.8
Morus alba	Cardiac disorders	3	3.52	1.28	9.69	4.15	1.17	14.71
Malus domestica	Renal and urinary disorders	10	3.41	1.9	6.11	3.72	1.93	7.19
Ligusticum porteri	Skin and subcutaneous tissue disorders	3	3.7	2.1	6.52	11.82	1.23	113.64
Terminalia catappa	Hepatobiliary disorders	5	5.37	2.34	12.35	5.85	2.32	14.73
Eschscholzia californica	Investigations	5	4.35	2.42	7.8	8.54	2.29	31.8
Eschscholzia californica	Psychiatric disorders	4	4.3	2.07	8.93	6.93	1.86	25.81
Eschscholzia californica	Respiratory, thoracic and mediastinal disorders	3	3.11	1.23	7.84	4.17	1.04	16.67
Actinidia chinensis	Gastrointestinal disorders	4	3.79	2.45	5.87	14.96	1.67	133.85
Rhododendron caucasicum	Gastrointestinal disorders	5	3.95	2.76	5.65	18.69	2.18	159.98
Lycium chilense	Respiratory, thoracic and mediastinal disorders	4	3.11	1.4	6.92	4.17	1.26	13.85
Lycium chilense	Cardiac disorders	3	4.4	1.65	11.72	5.53	1.5	20.43
Aralia elata	Reproductive system and breast disorders	6	6.47	3.08	13.61	7.33	3.1	17.34
Hoodia gordonii	Investigations	3	3.92	1.76	8.73	6.83	1.38	33.84
Chlorella vulgaris	Gastrointestinal disorders	33	3.55	2.99	4.21	11.22	5.67	22.2
Chlorella pyrenoidosa	Gastrointestinal disorders	33	3.55	2.99	4.21	11.22	5.67	22.2
Chlorella sp	Gastrointestinal disorders	33	3.55	2.99	4.21	11.22	5.67	22.2
Reynoutria japonica	Respiratory, thoracic and mediastinal disorders	3	3.5	1.43	8.56	5	1.19	20.92
Fallopia japonica	Respiratory, thoracic and mediastinal disorders	3	3.5	1.43	8.56	5	1.19	20.92
Polygonum cuspidatum	Respiratory, thoracic and mediastinal disorders	3	3.5	1.43	8.56	5	1.19	20.92
Phymatolithon calcareum	Nervous system disorders	3	3.87	2.2	6.81	12.47	1.3	119.89
Dioscorea composita	Hepatobiliary disorders	4	6.44	2.56	16.17	7.17	2.53	20.36
Euterpe oleracea	Gastrointestinal disorders	29	3.93	3.38	4.57	18.07	7.5	43.52
Crataegus pinnatifida	Hepatobiliary disorders	8	9.13	4.85	17.19	10.76	5.04	22.99
Epimedium grandiflorum	Psychiatric disorders	3	4.14	1.76	9.74	6.5	1.45	29.04
Tagetes erecta	Product issues	7	3.78	1.88	7.58	4.14	1.88	9.11
Prunus domestica	Gastrointestinal disorders	4	3.16	1.79	5.56	7.48	1.37	40.84
Coffea canephora	Hepatobiliary disorders	3	3.35	1.12	10.03	3.51	1.09	11.29
Trigonella foenum-graecum	Reproductive system and breast disorders	3	3.09	1.03	9.23	3.24	1.01	10.45
Salvia hispanica	Gastrointestinal disorders	20	3.51	2.81	4.39	10.68	4.52	25.26
Rumex acetosella	Investigations	4	6.27	4.04	9.72	27.33	3.05	244.53
Aristotelia chilensis	Gastrointestinal disorders	13	3.85	3.04	4.87	16.2	4.62	56.85
Mentha longifolia	Nervous system disorders	6	3.09	1.86	5.13	6.23	1.76	22.08
Chamaemelum nobile	Psychiatric disorders	3	7.25	4.12	12.77	26	2.7	249.97
Chamaemelum nobile	Nervous system disorders	3	3.87	2.2	6.81	12.47	1.3	119.89
Moringa oleifera	Nervous system disorders	4	4.12	2.66	6.39	16.62	1.86	148.7
Epimedium koreanum	Psychiatric disorders	4	4.3	2.07	8.93	6.93	1.86	25.81
Epimedium koreanum	Respiratory, thoracic and mediastinal disorders	4	4.15	2	8.62	6.67	1.79	24.84
Sorbus aucuparia	Respiratory, thoracic and mediastinal disorders	3	4	1.7	9.41	6.25	1.4	27.93
Plantago afra	Injury, poisoning and procedural complications	5	4.22	2.16	8.24	6.52	2.07	20.54
Plantago caffra	Injury, poisoning and procedural complications	5	5.63	3.14	10.1	11.42	3.07	42.53

## Sheet: TreeEval
Pathway	Related Pathways	Newick sub tree
Abacavir Pathway	Lamivudine Pathway; Tenofovir/ Adefovir pathway (PK); Nevirapine Pathway (PK); Zidovudine Pathway; Efavirenz pathway	((efavirenz:511.0,abacavir:448.0):122.0,(Didanosine:335.0,Nelfinavir:272.0,(Lamivudine:645.0,Stavudine:292.0):207.0,((Nevirapine:333.0,Zidovudine:449.0):230.0):64.0):64.0);
ACE Inhibitor Pathway	Losartan Pathway; Diuretics Pathway; Verapamil Pathway (PK); Beta-agonist/Beta-blocker Pathway; Agents acting on the renin-angiotensin system Pathway	((Losartan:423.0,Enalapril:617.0):35.0,(olmesartan:376.0,(Hydrochlorothiazide:409.0,valsartan:527.0):48.0,((candesartan:626.0,telmisartan:444.0):51.0):2.0):2.0);
Agents acting on the renin-angiotensin system Pathway	Losartan pathway (PK); Diuretics pathway; Verapamil pathway (PK); ACE Inhibitor pathway; Beta-agonist/Beta-blocker pathway	((dofetilide:288.0,Propafenone:329.0,Sotalol:445.0,dronedarone:257.0):30.0,(Diltiazem:394.0,Verapamil:443.0):43.0,((Amiodarone:563.0,Flecainide:420.0):75.0):10.0); ((Losartan:423.0,Enalapril:617.0):35.0,(olmesartan:376.0,(Hydrochlorothiazide:409.0,valsartan:527.0):48.0,((candesartan:626.0,telmisartan:444.0):51.0):2.0):2.0);
Anti-diabetic drug potassium channel inhibitors pathway	Metformin pathway (PK); Rosiglitazone Pathway (PK); Metformin pathway; Anti-diabetic drug Nateglinide pathway (PK); Anti-diabetic drug Repaglinide pathway (PK)	((nateglinide:337.0,(glimepiride:329.0,pioglitazone:370.0):67.0,((Glyburide:343.0,Glipizide:304.0):31.0,(Metformin:370.0,exenatide:225.0):34.0):10.0):36.0);
Antiarrhythmic Pathway	Glucocorticoid Pathway; ACE Inhibitor Pathway; Beta-agonist/Beta-blocker Pathway	((dofetilide:288.0,Propafenone:329.0,Sotalol:445.0,dronedarone:257.0):30.0,((Amiodarone:563.0,Flecainide:420.0):75.0):10.0);
Antimetabolite pathway	…	NA
Aromatase Inhibitor Pathway (Breast Cell)	Taxane Pathway (PK); Aromatase Inhibitor Pathway; Estrogen Metabolism Pathway; Tamoxifen Pathway (PK); Etoposide Pathway; Cyclophosphamide pathway; Doxorubicin Pathway; Platinum pathway	((Etoposide:471.0,Cytarabine:486.0):166.0,(rituximab:590.0,(Cyclophosphamide:382.0,(Doxorubicin:411.0,Vincristine:421.0):177.0):125.0):135.0);
Aromatase Inhibitor Pathway (Multiple Tissues)	Aromatase Inhibitor Pathway (Breast Cell); Estrogen Metabolism Pathway; Tamoxifen Pathway (PK)	((anastrozole:665.0,exemestane:364.0):56.0,(fulvestrant:262.0,(Tamoxifen:520.0,letrozole:488.0):175.0):39.0);
Atazanavir Pathway	0	NA
Benzodiazepine Pathway	Clobazam Pathway (PK); Benzodiazepine Pathway (PK)	((Clonazepam:482.0,Lorazepam:370.0):49.0,((Citalopram:514.0,Mirtazapine:525.0):69.0,(Escitalopram:371.0,(venlafaxine:511.0,(Fluoxetine:448.0,(Sertraline:512.0,Paroxetine:508.0):113.0):59.0):98.0):30.0):10.0);
Beta-agonist/Beta-blocker Pathway	Antiarrhythmic pathway; Leukotriene modifiers pathway; Glucocorticoid pathway (peripheral tissue); Glucocorticoid pathway – Transcription Regulation	((dofetilide:288.0,Propafenone:329.0,Sotalol:445.0,dronedarone:257.0):30.0,((Amiodarone:563.0,Flecainide:420.0):75.0):10.0);
Bisphosphonate pathway	0	((zoledronic acid:473.0,pamidronate:540.0):234.0);
Busulfan Pathway	Imatinib Pathway; Dasatinib Pathway (PK); Gemtuzumab ozogamicin Pathway	No Match
Celecoxib Pathway	Naproxen Pathway (PK); Celecoxib pathway (PK)	No Match
Cyclophosphamide Pathway	Dasatinib pathway (PK); Fluoropyrimidine Pathway (PK); Ifosfamide Pathway (PK); Platinum Pathway; Cyclophasphamide Pathway (PK)	No Match
Diuretics Pathway	Losartan Pathway (PK); Verapamil Pathway (PK); ACE Inhibitor Pathway; Beta-agonist/Beta-blocker Pathway; Agents acting on the renin-angiotensin system Pathway	((Losartan:423.0,Enalapril:617.0):35.0,(olmesartan:376.0,(Hydrochlorothiazide:409.0,valsartan:527.0):48.0,((candesartan:626.0,telmisartan:444.0):51.0):2.0):2.0);
Doxorubicin Pathway (Cancer cell)	Taxane pathway (PK); etoposide pathway; cyclophosphamide pathway platinum pathway	((Etoposide:471.0,Cytarabine:486.0):166.0,(rituximab:590.0,(Cyclophosphamide:382.0,(Doxorubicin:411.0,Vincristine:421.0):177.0):125.0):135.0);
Doxorubicin Pathway (Cardiomyocyte Cell)	Etoposide pathway; cyclophosphamide pathway	((Etoposide:471.0,Cytarabine:486.0):166.0,(rituximab:590.0,(Cyclophosphamide:382.0,(Doxorubicin:411.0,Vincristine:421.0):177.0):125.0):135.0);
Efavirenz Pathway	Abacavir pathway; Lamivudine Pathway; Tenofovir/ Adefovir pathway (PK); Nevirapine Pathway (PK); Zidovudine Pathway	((efavirenz:511.0,abacavir:448.0):122.0,(Didanosine:335.0,Nelfinavir:272.0,(Lamivudine:645.0,Stavudine:292.0):207.0,((Nevirapine:333.0,Zidovudine:449.0):230.0):64.0):64.0);
EGFR Inhibitor Pathway	VEGF Signaling pathway; vemurafenib pathway; erlotinib pathway (PK); Gefitinib pathway	((axitinib:159.0,pazopanib:331.0):36.0,(cabozantinib:143.0,(regorafenib:156.0,(sorafenib:372.0,sunitinib:376.0):98.0):23.0):8.0);
Etoposide Pathway	Taxane pathway (PK); Cyclophosphamide pathway; Platinum Pathway	((Etoposide:471.0,Cytarabine:486.0):166.0,(rituximab:590.0,(Cyclophosphamide:382.0,(Doxorubicin:411.0,Vincristine:421.0):177.0):125.0):135.0);
Fluoropyrimidine Pathway	Methotrexate pathway; Gemcitabine pathway; antimetabolite pathway	No Match
Gemcitabine Pathway	Fluoropyrimidine pathway; Antimetabolite pathway	((Paclitaxel:421.0,Carboplatin:368.0):151.0,(Cisplatin:613.0,gemcitabine:506.0):90.0);
Gemtuzumab ozogamicin Pathway	Busulfan pathway	(Gemtuzumab ozogamicin:207.0,(Idarubicin:393.0,Mitoxantrone:552.0):102.0,((clofarabine:287.0,(pegaspargase:224.0,(Daunorubicin:533.0,ASPARAGINASE:344.0):173.0):69.0):48.0):16.0);
Glucocorticoid pathway	...Theophylline pathway (PK); Beta-agonist/Beta-blocker pathway…	((Azathioprine:1107.0,Prednisone:791.0):246.0,(mesalamine:570.0,mercaptopurine:657.0):58.0);
Glucocorticoid Pathway (HPA Axis)	…	NA
Glucocorticoid Pathway (Peripheral tissue)	…	NA
Ibuprofen Pathway	Celecoxib pathway; naproxen pathway (PK);	((Ibuprofen:518.0,Acetaminophen:385.0):72.0,(Caffeine:482.0,Naproxen:420.0):33.0);
Ifosfamide Pathway	Cyclophosphamide pathway	((Ifosfamide:425.0,Mesna:282.0):167.0,(Thiotepa:262.0,alemtuzumab:361.0,(Filgrastim:529.0,(Busulfan:338.0,fludarabine:385.0):139.0,((Etoposide:471.0,Cytarabine:486.0):166.0,(rituximab:590.0,(Cyclophosphamide:382.0,(Doxorubicin:411.0,Vincristine:421.0):177.0):125.0):135.0):59.0):66.0):34.0);
Imatinib Pathway	Dasatinib pathway; Cyclophosphamide pathway	((dasatinib:231.0,(nilotinib:347.0,imatinib:881.0):91.0):28.0);
Irinotecan Pathway	Taxane pathway (PK); Vinka alkaloid pathway; fluoropyrimidine pathway; etoposide pathway; irinotecan pathway	((capecitabine:461.0,bevacizumab:596.0):108.0,(irinotecan:310.0,(oxaliplatin:211.0,(Fluorouracil:382.0,Leucovorin:283.0):68.0):118.0):53.0);
Ivacaftor pathway	0	NA
Lamivudine Pathway	Abacavir pathway; Zidovudine pathway; tenofovir/adefovir pathway; Nevirapine pathway (PK); Efavirenz pathway	((efavirenz:511.0,abacavir:448.0):122.0,(Didanosine:335.0,Nelfinavir:272.0,(Lamivudine:645.0,Stavudine:292.0):207.0,((Nevirapine:333.0,Zidovudine:449.0):230.0):64.0):64.0);
Leukotriene modifiers pathway	Theophylline pathway; glucocorticoid pathway; beta-agonist/beta-blocker pathway	((Theophylline:499.0,Oxygen:653.0):40.0,(Levalbuterol:360.0,Ipratropium:416.0):54.0,(Budesonide:583.0,montelukast:462.0):72.0,(Albuterol:248.0,(tiotropium:304.0,formoterol:389.0):72.0,((salmeterol:264.0,fluticasone:402.0):76.0):9.0):10.0);
Macrolide Antibiotic Pathway	0	NA
Metformin Pathway	Anti-diabetic drug nateglinide pathway (PK); Anti-diabetic drug Repaglinide pathway; Anti-diabetic drug potassium channel inhibitors pathway	((nateglinide:337.0,(glimepiride:329.0,pioglitazone:370.0):67.0,((Glyburide:343.0,Glipizide:304.0):31.0,(Metformin:370.0,exenatide:225.0):34.0):10.0):36.0);
Methotrexate Pathway	Methotrexate pathway; thiopurine pathway; fluoropyrimidine pathway; vinca alkaloid pathway…	No Match
Methylene Blue Pathway	… Uric acid lowering drugs pathway	No Match
Mycophenolic acid pathway	Tacrolimus/Cyclosporine pathway	((Mycophenolic Acid:622.0,valganciclovir:483.0):113.0,((Ganciclovir:500.0,Rabbit anti-human T-lymphocyte globulin:408.0):80.0,(basiliximab:443.0,(Methylprednisolone:662.0,(mycophenolate mofetil:593.0,Tacrolimus:661.0):302.0,(prednisolone:1233.0,Cyclosporine:911.0):198.0):164.0):72.0):10.0);
Nicotine Pathway (Chromaffin Cell)	Nicotine Pathway; Nicotine Pathway (Chromaffin Cell)	NA
Nicotine Pathway (Dopaminergic Neuron)	Nicotine Pathway (PK); Nicotine Pathway (Chromaffin Cell)	NA
Peginterferon alpha-2a/peginterferon alpha-2b pathway (Hepatocyte)	0	NA
Pentose Phosphate Pathway (Erythrocyte)	…	NA
Platelet Aggregation Inhibitor Pathway	Clopidogrel pathway (PK)	(Aspirin:281.0,clopidogrel:416.0):95.0
Platinum pathway	Fluoropyrimidine pathway (PK); Taxane Pathway (PK); Fluoropyrimidine pathway	No Match
Proton Pump Inhibitor Pathway	…	NA
Selective Serotonin Reuptake Inhibitor Pathway	Fluoxetine pathway (PK); Paroxetine pathway (PK); fluvoxamine pathway (PK); citalopram pathway	((Escitalopram:371.0,(venlafaxine:511.0,(Fluoxetine:448.0,(Sertraline:512.0,Paroxetine:508.0):113.0):59.0):98.0):30.0); ((Clonazepam:482.0,Lorazepam:370.0):49.0,((Citalopram:514.0,Mirtazapine:525.0):69.0,(Escitalopram:371.0,(venlafaxine:511.0,(Fluoxetine:448.0,(Sertraline:512.0,Paroxetine:508.0):113.0):59.0):98.0):30.0):10.0);
Sirolimus Pathway	0	NA
Sorafenib	Sorafenib (PK); VEGF signaling pathway (..see drug list…), pazopanib pathway (PK)	((cabozantinib:143.0,(regorafenib:156.0,(sorafenib:372.0,sunitinib:376.0):98.0):23.0):8.0);
Statin Pathway	Pravastatin pathway (PK); Fluvastatin pathway (PK); rosuvastatin pathway (PK); atorvastatin/lovastatin/simvastatin pathway (PK); statin pathway – Generalized (PK)	((Fenofibrate:410.0,ezetimibe:373.0):34.0,(atorvastatin:378.0,rosuvastatin:406.0):32.0);
Succinylcholine Pathway	0	NA
Tacrolimus/Cyclosporine Pathway	Mycophenolic acid pathway; tacrolimus/cyclosporine pathway (PK)	((mycophenolate mofetil:593.0,Tacrolimus:661.0):302.0,(prednisolone:1233.0,Cyclosporine:911.0):198.0);
Thiopurine Pathway	Fluoropyrimidine Pathway (PK); Methotrexate pathway; Vinka alkaloid pathway (PK); Cyclophosphamide pathway; Doxorubicin pathway; antimetabolite pathway- Folate Cycle	((certolizumab pegol:580.0,(Azathioprine:1107.0,Prednisone:791.0):246.0,(mesalamine:570.0,mercaptopurine:657.0):58.0):64.0);
Uric acid lowering drugs pathway	….	NA
Uricosurics pathway	Uric acid lowering drugs pathway	NA
Valproic Acid Pathway	Carbamazepine pathway (PK); Phenytoin Pathway (PK); Valproic Acid pathway (PK)	((topiramate:492.0,(Valproate:766.0,Carbamazepine:747.0):209.0):35.0);
Vemurafenib Pathway	VEGF Signaling pathway (..see drug list..); EGFR Inhibitor pathway	((trametinib:51.0,dabrafenib:68.0):64.0,(ipilimumab:266.0,Vemurafenib:279.0):38.0);
Warfarin Pathway	Warfarin pathway (PK)	((Acenocoumarol:492.0,Warfarin:502.0):45.0,((tinzaparin:481.0,Dalteparin:620.0):61.0,(Enoxaparin:706.0,fondaparinux:417.0):62.0):15.0);
Zidovudine Pathway	Abacavir pathway; Lamivudine Pathway; Tenofovir/ Adefovir pathway (PK); Nevirapine Pathway (PK); Efavirenz Pathway	((efavirenz:511.0,abacavir:448.0):122.0,(Didanosine:335.0,Nelfinavir:272.0,(Lamivudine:645.0,Stavudine:292.0):207.0,((Nevirapine:333.0,Zidovudine:449.0):230.0):64.0):64.0);
